# Supplementary material
Source: publisher figshare collection journal article supplement (https://rs.figshare.com/ndownloader/files/8753680)
Supplement: Supplementary file 1 [file 8753680]

Supporting Information
Table S1. Raw data from the 1882 squamate species with their respective mean values for the 19 variables used in pPCA analysis.
	bio_1	bio_2	bio_3	bio_4	bio_5	bio_6	bio_7	bio_8	bio_9	bio_10	bio_11	bio_12	bio_13	bio_14	bio_15	bio_16	bio_17	bio_18	bio_19
Ablepharus_budaki	14.32	11.11	3.63	69.34	30.67	0.37	30.3	5.81	22.96	23.05	5.41	718.49	140.61	5.16	75.95	375.42	22.52	28.5	373.11
Ablepharus_chernovi	10.15	11.72	3.33	80.42	29.01	-5.75	34.76	4.42	19.97	20.21	-0.34	583.71	93.04	6.63	58.87	253	26.45	35.77	227.51
Ablepharus_kitaibelii	11.6	10.2	3.35	70.51	27.85	-2.16	30.02	9.66	15.22	20.51	2.49	661.56	94.89	25.55	38.36	252.41	87.52	114.21	218.45
Abronia_anzuetoi	20.7	9.9	7.7	5.89	27.1	14.3	12.8	20.8	19.9	21.4	19.9	2266	470	7	90	1103	30	325	75
Abronia_aurita	18.47	9.57	7	11.52	25.1	11.5	13.6	19.33	17.63	19.63	16.77	2271.33	360.33	59	64.67	963.33	191.67	710.67	245.33
Abronia_campbelli	22.1	10.6	6.9	10.62	30.1	14.8	15.3	22.5	20.8	23.4	20.6	1116	250	4	93	590	17	149	34
Abronia_chiszari	22.2	8.9	5.8	19.17	30	14.9	15.1	23.5	23.3	24.2	19.5	2898	480	60	62	1293	195	479	438
Abronia_fimbriata	18.53	9.76	7.08	11.85	25.12	11.46	13.66	19.52	17.76	19.71	16.76	2287.64	366.36	60	61.91	973.27	200.27	707.18	244
Abronia_frosti	15.8	12.45	7.5	7.89	24.1	7.5	16.6	16.2	15.45	16.7	14.65	2037	336	48.5	63	905.5	171.5	545.5	205.5
Abronia_graminea	12.93	14.41	7.09	14.74	23.04	2.86	20.19	13.53	11.94	14.6	10.8	1181	226.14	20	82	637.29	67	314.14	94.29
Abronia_lythrochila	15.6	12.65	7.32	11.8	23.87	6.67	17.2	16.53	14.55	16.73	13.87	1463.67	245	32.83	66.67	647.33	114	513.33	138
Abronia_matudai	15.6	12.25	7.4	10.14	23.15	6.75	16.4	16.25	14.05	16.55	14.05	2404	432	18.5	78	1091	66.5	890.5	66.5
Abronia_mixteca	16.41	16.58	7.31	12.86	27.26	4.72	22.54	17.11	14.71	17.98	14.59	1029.4	218.2	7	91.9	576.1	35.6	349.7	39
Abronia_oaxacae	15.59	13.33	7.29	10.38	24.73	6.53	18.2	15.98	14.63	16.92	14.19	1064.17	224.75	7.75	90.58	586.08	33.67	254.83	44.83
Abronia_ornelasi	21.4	11.3	6.8	14.86	29.4	13	16.4	22.5	21.2	22.9	19.3	1179	217	17	84	632	56	302	96
Acalyptophis_peronii	25.56	8.23	5.72	22.87	32.56	17.49	15.07	27.25	23.43	28.11	22.31	1634.59	311.62	31.57	78.45	835.27	116.3	540.55	195.72
Acanthocercus_atricollis	21.99	13.29	6.12	26.32	32.03	10.12	21.91	24.14	18.86	24.69	18.14	820.8	175.72	8.6	91.74	477.39	35.2	309.31	48.97
Acanthodactylus_beershebensis	18.73	12.18	4.65	52.56	32.15	6.15	26	11.6	24.75	24.78	11.6	273.5	64	0	105.5	171.75	0	0	171.75
Acanthodactylus_blanci	15.7	12.31	3.92	64.63	33.61	2.59	31.03	8.66	24.15	24.25	7.83	473.36	64	7.45	45.59	179.91	39.59	44.27	174.32
Acanthodactylus_busacki	20.21	11.87	4.89	41.72	32.56	8.05	24.51	17.99	23.77	25.6	14.65	84.36	19.15	0.11	83.4	46.33	1.26	6.31	40.2
Acanthodactylus_erythrurus	14.76	11.39	3.85	60.73	31.28	2.1	29.18	10.73	21.92	22.91	7.4	486.39	69.26	7.54	48.47	187.84	39.21	44.56	167.43
Acanthodactylus_gongrorhynchatus	26.65	11.56	4.08	60.05	40.13	12.12	28.02	21.41	33.34	33.66	18.44	63.66	17.02	0	108.48	44.02	0	0	33.41
Acanthodactylus_maculatus	18.02	13.26	3.88	70.31	36.45	2.72	33.73	13.45	26.67	27.24	9.2	205.81	28.95	2.99	49.73	77.44	17.15	19.43	67.57
Acanthodactylus_masirae	26.69	10.86	4.95	35.37	37.38	15.66	21.72	25.33	27.77	30.74	21.65	36.05	10.14	0.1	88.9	23.43	1.71	8.52	10.05
Acanthodactylus_opheodurus	23.63	13.81	4.57	61.17	38.56	8.14	30.43	19.82	29.6	30.83	15.35	107.55	25.21	0.11	89.46	56.84	1.59	6.7	34.93
Acanthodactylus_orientalis	20.27	14.49	3.77	86.37	40.75	2.75	38	9.75	31.1	31.12	9.04	217.78	41.97	0	84.58	112.75	0.17	0.23	109.85
Acanthodactylus_pardalis	19.16	11.09	4.55	48.29	30.75	6.67	24.09	13.2	24.72	24.9	12.72	111.38	29.84	0	100.54	73.51	0.17	0.81	72.89
Acanthodactylus_schmidti	25.03	13.44	4.27	65.82	40.45	9.19	31.27	20.28	31.91	32.78	16.08	92.96	23.69	0.02	100.73	54.38	0.74	1.31	36.55
Acanthodactylus_schreiberi	17.99	11.28	4.04	59.62	32.98	5.38	27.6	10.61	25.49	25.56	10.61	508.53	117.8	1.53	90.3	294.57	9.47	10.73	281.2
Acanthodactylus_tristrami	16.4	13.49	4.23	67.3	33.16	1.54	31.61	7.69	24.51	24.54	7.44	208.78	44.38	0	90.42	121.49	0.28	0.36	121.21
Acanthosaura_lepidogaster	23.01	9.9	4.75	33.49	32.56	11.38	21.18	25.35	19.06	26.69	18.21	1631.03	328.19	12.94	81.06	873.68	54.68	578.51	74.68
Achalinus_meiguensis	8.3	10.88	3.8	59.08	20.98	-7.15	28.12	15.33	0.21	15.43	0.19	994.05	205.25	7.02	86.49	556.87	26.4	553.21	26.4
Achalinus_rufescens	19.84	7.9	3.2	59.2	31.39	6.81	24.58	24.69	13.34	26.75	11.72	1608.92	282.53	33.58	64.42	761.34	120.44	672.09	151.4
Acontias_breviceps	15.37	13.86	5.75	35.99	26.05	1.94	24.11	19.06	10.29	19.4	10.29	795.21	130.2	11.58	63.62	368.86	42.98	356.99	42.98
Acontias_gracilicauda	16.46	15.34	5.37	45.74	29.5	0.96	28.55	20.7	10.79	21.73	10.12	517.07	84.49	9.96	60.12	231.35	35.63	216.99	38.32
Acontias_lineatus	17.48	15.17	5.43	45.46	31.4	3.45	27.95	18.23	16.43	22.98	11.38	215.05	37.22	5.43	56.31	97.75	20.31	51.42	56.29
Acontias_percivali	21.07	15.65	5.76	36.73	32.7	5.66	27.05	24.06	15.77	24.72	15.72	460.31	106.85	0.98	98.25	282.34	4.58	181.47	5.6
Acontias_plumbeus	20.71	12.25	5.9	28.29	29.76	9.15	20.62	23.67	16.94	23.82	16.66	815.47	145.94	15.23	68.37	400.78	53.5	384.41	55.45
Acrantophis_dumerili	22.94	13.55	6.42	25.32	32.28	11.37	20.91	25.47	19.52	25.53	19.23	933.38	231.18	8.15	101.24	593.86	29.17	516.49	32.79
Acrantophis_madagascariensis	25.42	11.11	6.73	16.31	32.78	16.36	16.41	26.73	23.3	26.96	22.98	1543.02	392.82	13.99	106.4	974.53	53.87	688.97	68.84
Acrochordus_arafurae	26.62	11.64	5.91	25.28	35.64	15.75	19.89	28.39	23.18	29.34	22.87	1138.9	272.34	5.39	108.62	739.14	22.87	443.83	25.52
Acrochordus_granulatus	26.54	7.91	7.35	9.55	32.1	20.9	11.2	26.75	25.84	27.57	25.17	2387.82	377.25	82.62	54.82	1016.58	284.85	573.28	504.31
Acrochordus_javanicus	25.65	9.15	7.89	7.56	31.74	19.4	12.34	25.63	24.96	26.47	24.56	2445.83	328.23	103.05	42.7	884.35	346.86	592.09	579.99
Acutotyphlops_kunuaensis	25.67	6.77	8.47	3.97	29.86	21.89	7.96	25.45	25.86	26.06	25.06	3441.62	379.06	229.44	14.81	1021.94	741.81	844.81	943.19
Acutotyphlops_subocularis	24.82	7.36	8.37	4.49	29.41	20.65	8.76	24.61	24.93	25.2	24.13	3490.72	447.68	189.67	28.23	1227.48	629.93	885.1	1005.78
Adelophis_foxi	16.6	12.6	5.85	30.9	26.85	5.45	21.4	19.5	16.95	20.1	12.3	1153.5	250	6.5	88.5	701	43.5	608.5	174.5
Adelphicos_quadrivirgatum	23.02	11.11	6.12	23.69	32.01	13.55	18.45	24.62	21.19	25.61	19.65	1508.07	257.3	33.14	63.88	654.95	117.21	441.53	185.83
Adolfus_alleni	12	12.61	8.01	7.32	20.5	4.84	15.66	12.2	12.05	12.89	10.98	1521.38	238.38	46.31	48.69	579.38	187.56	379.44	359.69
Afronatrix_anoscopus	26.02	11.41	6.74	13.55	34.83	17.66	17.17	25.11	25.8	27.86	24.38	1527.93	306.14	9.91	82.94	780.18	50.47	237.08	522.47
Agama_boueti	28.26	15.01	5.27	42.68	41.4	13.03	28.37	31.04	24.41	33.03	22.11	166.41	65.57	0.01	147.71	141.1	0.2	38.33	0.71
Agama_boulengeri	28.42	14.5	5.17	43.51	41.55	13.74	27.81	32.02	25.97	33.43	22.29	161.36	58.83	0.1	133.22	133.97	1.34	46.59	3.5
Agama_hispida	16.65	15.12	5.5	43.95	30.5	2.93	27.56	16.1	16.65	21.97	10.79	234.95	40.28	6.16	53.26	104.41	22.39	54.52	63.6
Agama_impalearis	17.56	13.14	4.23	60.53	34.56	3.39	31.17	13.85	24.4	25.65	10.03	258.68	39.8	2.54	58.97	105.73	14.94	17.81	94.75
Agama_insularis	26.4	11.32	6.14	15.26	36.14	17.82	18.32	24.89	26.25	28.67	24.83	2510.02	689.64	1.47	107.16	1672.51	10.48	193.25	1495.05
Agama_mwanzae	22.25	11.66	7.28	8.46	30.2	14.18	16.02	22.25	21.25	23.34	21.18	930.85	171.25	3.33	77.2	431.03	20.74	177.95	55.62
Agama_spinosa	24	13.86	6.37	24.05	34.95	13.2	21.75	24.09	22.53	26.98	20.92	535.22	137.78	3.43	95.94	331.25	17.11	98.77	168.11
Agama_weidholzi	27	14.14	6.02	20.59	38.24	14.93	23.31	26.22	25.93	29.9	24.63	1114.43	308.24	0.43	120.07	781.85	3.14	117.79	27.34
Agamura_persica	18.69	15.33	4	81.08	37.82	-0.12	37.94	11.17	26.41	28.88	7.92	141.96	31.13	0.71	87.8	78.17	4.04	12.44	66.76
Agkistrodon_bilineatus	25.52	11.84	6.82	15.67	34.01	16.64	17.37	26.37	24.92	27.29	23.36	1332.78	281.64	8.99	90.16	726.51	35.39	353.08	107.1
Agkistrodon_contortrix	14.94	12.87	3.65	79.42	32.07	-2.95	35.02	18.27	10.86	24.79	4.27	1133.29	129.07	62.77	22.92	349.5	213.51	299.13	252.49
Agkistrodon_piscivorus	17.48	12.85	3.92	71.5	33.25	0.56	32.69	19.23	16.09	26.3	7.87	1217.01	144.63	64.54	24.74	388.92	224.2	324.33	282.94
Agkistrodon_taylori	23.33	12.27	5.17	39.89	34.14	10.57	23.57	26.91	19.32	27.68	17.73	935.61	192.66	17.66	73.64	454.53	67.26	388.39	79.49
Ahaetulla_fronticincta	24.06	9.7	4.94	23.42	33.13	13.5	19.63	25.16	21.75	26.82	20.79	2855.75	665.31	3.99	102.73	1828.31	22.24	608.49	28.53
Ahaetulla_pulverulenta	25.65	8.8	5.87	15.66	33.13	18.04	15.09	25.27	24.88	27.84	23.79	2708.9	907.81	6.43	116.54	1963.32	32	352.53	654.22
Ailuronyx_seychellensis	25.94	4.17	6.64	6.07	29.53	23.3	6.23	25.91	25.37	26.73	25.17	2208.4	373	67.5	48.3	942.4	229.9	531.3	286.2
Ailuronyx_tachyscopaeus	25.77	4.17	6.61	6.07	29.37	23.11	6.26	25.74	25.19	26.56	24.99	2212.57	373.14	67.71	48.14	943.14	230.86	533.14	287
Ailuronyx_trachygaster	26.03	4.13	6.6	6.1	29.63	23.4	6.23	25.97	25.47	26.83	25.27	2166.33	365	66.33	48	922.33	226.33	521.67	280.67
Aipysurus_duboisii	25.74	9.44	5.61	24.55	33.19	16.38	16.82	27.76	23.46	28.43	22.16	1216.7	271	12.89	95.13	738.58	48.47	472.32	69.72
Aipysurus_eydouxii	26.55	8.18	7.4	9.55	32.19	20.81	11.38	26.8	25.91	27.57	25.17	2100.37	335.37	67.77	56.79	898.15	237.71	499.43	458.41
Aipysurus_fuscus	26.64	8.34	7.57	5.06	32.1	21.14	10.95	26.6	26.39	27.16	25.89	2226.33	350.93	57.56	48.41	921.37	205.37	419.74	436.26
Aipysurus_laevis	25.76	9.14	5.98	21.87	33.01	17.32	15.69	26.96	24.11	28.18	22.6	1402.88	267.4	29.24	83.7	733.81	105.23	486.56	153.84
Algyroides_fitzingeri	14.31	7.36	3.23	53.43	27.1	4.72	22.39	11.7	21.26	21.51	8.08	660.19	97.83	8.31	51.02	266.07	48.96	69.19	236.84
Algyroides_marchi	12.19	12.09	3.78	65.77	30.71	-0.85	31.56	10.08	21.1	21.11	4.45	529.14	67.21	13.14	35.86	182.36	62.79	64.29	144.64
Algyroides_moreoticus	14.76	9.69	3.66	58.26	29.4	3.36	26.04	9.26	22.31	22.34	7.69	790.1	142.14	9.4	68.28	382.15	36.63	43.14	351.59
Algyroides_nigropunctatus	12.49	8.79	3.22	63.6	27.27	0.42	26.86	8.01	18.75	20.71	4.49	1150.15	155.67	46.34	36.78	430.76	159.43	166.61	369.2
Alluaudina_bellyi	23.52	10.9	7.01	15.41	30.6	15.15	15.46	24.87	21.46	24.99	21.26	1613.77	367.36	19.61	94.17	967.34	72.46	770.99	77.91
Alopoglossus_angulatus	25.97	9.99	7.94	4.91	32.43	19.79	12.64	25.76	25.95	26.53	25.31	2364.21	328.31	76.76	45.73	913.28	267.68	429.21	605.19
Alopoglossus_copii	25.77	9.27	8.42	5.31	31.28	20.33	10.96	25.52	26.02	26.26	24.95	2962.21	326.14	170.7	19.38	921.17	563.1	630.29	793.39
Alsophis_antiguae	26.3	6.1	6.6	11.17	30.5	21.3	9.2	27.3	25.2	27.4	24.7	1082	139	38	34	385	139	294	153
Alsophylax_pipiens	6.1	11.8	2.42	129.4	30.62	-17.2	47.82	10.05	4.19	22.1	-10.94	203.7	26.6	9.25	34.54	70.52	33.07	53.96	44.37
Amastridium_veliferum	25.32	9.03	7.75	6.96	31.4	19.82	11.58	24.84	25.65	26.28	24.45	3738.18	506.9	123.47	38.16	1310.08	460.02	667.41	1180.39
Ameiva_chrysolaema	24.72	11.18	7.4	11.82	31.83	16.85	14.98	25.55	23.17	26.02	22.99	1224	185.38	32.26	52.47	473.21	113.67	392.76	127.1
Ameiva_corax	27.1	5.8	6.4	11.4	31.4	22.4	9	27.7	25.9	28.3	25.5	954	117	45	31	334	155	270	162
Ameiva_lineolata	24.49	11.63	7.47	11.85	31.83	16.37	15.46	25.42	22.88	25.81	22.75	1089.92	172.44	24.33	56.56	437.25	86.37	364.67	89.87
Amphibolurus_norrisi	16.75	13.06	5.19	42.31	30.16	5.17	24.98	12.16	21.51	22.03	11.21	340.82	44.3	13.88	31.31	123.07	49.55	51.77	118.97
Amphiglossus_anosyensis	20.1	10.82	6.23	25.19	28	10.79	17.22	22.8	17.48	22.84	16.5	1539.77	293.92	38.88	73.93	803.85	137.98	789.65	160.17
Amphiglossus_astrolabi	21.39	9.98	6.22	23.72	28.92	13.02	15.9	24	19.31	24.03	18.1	1990.9	341.1	54.24	63.87	949.79	204.47	930.8	270.94
Amphiglossus_frontoparietalis	21.81	9.65	6.21	23.43	29.17	13.74	15.43	24.4	19.96	24.44	18.59	2233.3	377.16	61.89	60.93	1059.76	233.6	1033.28	309.91
Amphiglossus_macrocercus	18.37	11.98	6.4	25.07	26.96	8.38	18.58	20.96	14.97	20.97	14.72	1254.03	273.31	16.91	90.63	728.76	55.27	720.12	57.18
Amphiglossus_mandokava	24.17	10.3	7.11	14.02	30.71	16.3	14.4	25.38	22.33	25.46	22.11	1600.88	366.29	19.15	94.12	963.47	72.53	787.15	75.97
Amphiglossus_melanurus	23.49	9.44	6.75	17.25	30.11	16.24	13.87	25.25	21.96	25.32	21.03	1809.37	317.08	45.28	67.82	874.81	172.39	821.06	223.21
Amphiglossus_ornaticeps	24.99	12.9	6.61	20.93	33.51	14.1	19.41	26.88	22.18	27.09	21.89	1099.89	298.83	4.47	107.91	737.51	18.06	492.89	21.22
Amphiglossus_punctatus	22.43	9.38	6.15	23.06	29.62	14.47	15.15	25.03	20.66	25.06	19.27	2325.12	377.11	67.49	55.44	1064.65	261.71	1035.33	349.44
Amphiglossus_reticulatus	25.9	11.47	6.86	14.43	33.3	16.63	16.67	26.86	23.81	27.2	23.67	1514.8	417.8	5.64	112.89	1022.13	22.76	600.08	23.81
Amphiglossus_splendidus	23.01	12.66	6.46	24.95	31.72	12.34	19.38	25.68	20.41	25.73	19.45	1074.38	206.45	25.62	71.07	555.28	92.41	452.07	118.38
Amphiglossus_tanysoma	25.39	12.02	6.92	14.4	33.27	15.94	17.33	26.36	23.21	26.7	23.19	1596.52	437.29	4.61	113.52	1076.87	16.61	662.1	17.29
Amphiglossus_tsaratananensis	19.9	12.3	7.1	17.61	28	10.83	17.17	21.57	17.4	21.57	17.33	1517.33	327.67	14.33	96.67	905.67	47.67	905.67	55.67
Amphisbaena_alba	23.77	11.3	6.97	16.3	32.25	15.3	16.95	24.7	22.31	25.68	21.58	1688.25	256.42	43.73	55.27	704.89	157.18	366.74	366.85
Amphisbaena_angustifrons	17.61	13.12	4.93	46.01	31.31	4.85	26.45	22.78	11.92	23.35	11.6	790.45	117.53	23.14	53.26	318.06	78.51	303.06	81.02
Amphisbaena_bolivica	21.82	13.43	5.4	39.16	33.8	8.73	25.08	26.03	16.8	26.45	16.52	840.5	142.44	13.36	69.13	390.16	51.42	363.05	60.93
Amphisbaena_hyporissor	25.3	10.73	7.45	11.55	32.18	17.88	14.3	26.45	23.78	26.7	23.68	980.25	158	27	55.5	413.75	92	337	93.5
Amphisbaena_polystegum	24.95	10.82	7.57	7.82	32.26	17.94	14.32	24.92	24.68	25.83	23.88	1590.79	266.78	27.29	65.98	730.27	101.3	261.75	517.18
Amphisbaena_schmidti	24.58	10.58	7.55	12.02	31.23	17.28	13.95	25.55	22.88	25.9	22.88	1799	219.5	77	29.75	564.25	264.75	517.25	264.75
Anatololacerta_anatolica	12.96	11.17	3.72	66.96	29.47	-0.18	29.65	4.9	21.35	21.58	4.55	688.67	124.1	10.84	61.04	317.83	45.67	51.52	316.43
Anatololacerta_danfordi	11.38	11	3.5	71.27	28.26	-2.69	30.95	2.62	20.26	20.43	2.24	644.24	112.91	7.94	63.58	306.45	30.3	42.54	305.66
Androngo_trivittatus	23.81	12.42	6.22	27.85	32.75	12.97	19.79	26.98	20.68	26.98	19.95	541.63	103.48	12.72	75.59	287.15	46.7	281.2	64.65
Anelytropsis_papillosus	22.84	12.5	5.44	35.19	33.38	10.67	22.71	25.81	19.16	26.45	17.82	1217.24	252.37	21.04	82.26	640.54	73.41	512.87	80.83
Anniella_geronimensis	18.13	16.31	5.93	40.45	32.68	5.38	27.3	13.67	20.45	24.05	13.6	174.83	31.58	0	77.5	90.42	3.83	17.17	90.33
Anniella_pulchra	15.35	14.86	5	53.46	31.92	2.1	29.83	9.64	21.27	22.48	8.97	380.06	72.7	1.06	81.33	201.86	8.86	17.95	193.74
Anolis_ahli	22.1	9.3	6.1	19.04	29.2	14	15.2	23.9	19.4	24.2	19.4	1747	264	27	59	695	148	667	148
Anolis_allogus	25.07	10.18	6.45	18.22	32.54	16.88	15.66	26.58	22.58	27.17	22.48	1307.05	203.81	33.06	56.83	519.95	115.59	451.33	121.53
Anolis_altae	19.24	9.8	8.01	5.94	25.58	13.41	12.16	19.09	19.16	19.97	18.43	3049.91	449.77	63.51	54.35	1218.81	225.09	634.28	586.93
Anolis_alumina	22.83	11.27	7.57	11.14	29.79	15	14.79	23.9	21.32	24.15	21.25	1298.46	204.62	33.23	57.15	547.15	112	442.38	113
Anolis_armouri	20.65	11.21	7.38	11.83	27.72	12.68	15.04	21.62	18.99	22.02	18.96	1700.69	270.44	42.12	56.06	689	152.06	532.62	153
Anolis_bimaculatus	25.9	5.9	6.43	11	30.18	21.1	9.08	26.88	24.63	27.05	24.33	1332.83	165.5	58	31.33	465.33	201	437.33	215.67
Anolis_carolinensis	18.13	12.76	4.05	67.57	33.17	1.87	31.3	19.04	17.95	26.45	9.06	1278	151.84	68.69	24.16	407.75	237.69	347.95	310.99
Anolis_carpenteri	23.94	9.37	7.61	6.81	30.36	18.1	12.26	23.74	24.2	24.85	23.07	2689.32	387.21	69.47	53.6	1033.49	252.27	455.04	596.99
Anolis_centralis	25.07	9.9	6.49	17.03	32.31	17.16	15.15	26.45	22.69	27.05	22.63	1233.85	192.26	31.69	55.23	479.57	108.71	387.88	110.91
Anolis_clivicola	21.4	9.8	6.73	15.34	28.43	13.93	14.5	22.77	19.23	23.23	19.23	1625.67	250	46.67	51	594.67	150.33	555	150.33
Anolis_festae	24.9	9.03	7.89	7.46	30.73	19.34	11.39	25.66	24.08	25.83	24	1769.02	375.94	20.88	95.67	1034.94	77.23	984.58	87.77
Anolis_fitchi	16.72	10.2	8.69	4.24	22.75	11.08	11.68	16.45	16.87	17.1	16.04	2503.35	283.6	148.95	20.19	791	477.54	555.8	733.99
Anolis_fraseri	19.18	9.91	8.74	3	24.92	13.63	11.28	19.17	19.02	19.49	18.76	2546.57	344.82	100.52	42.07	949.78	358.48	776.93	648.84
Anolis_gemmosus	14.45	10.51	8.76	2.59	20.37	8.45	11.92	14.65	14.12	14.69	14.07	1521.7	223.48	36.86	47.25	627.2	145.11	578.27	217.98
Anolis_grahami	24.03	7.22	6.89	9.87	29.21	18.79	10.42	24.71	22.76	25.14	22.65	1817.31	294.53	60.06	47.81	714.17	213.14	516.67	221.31
Anolis_guafe	25.2	9.55	6.65	14.69	32	17.75	14.25	26.6	23.2	26.85	23.1	1071	172.5	30	54.5	429	107	343	107
Anolis_haetianus	24.67	9	6.97	10.43	30.7	17.93	12.77	24.9	23.5	25.9	23.2	1839.67	265.33	68.33	38.67	619.33	240	450.33	295.33
Anolis_jacare	15.79	10.5	8.18	4.44	21.68	8.89	12.79	16	15.26	16.13	15.07	1074.46	147.98	26.9	46.51	399.37	94.34	322.71	118.15
Anolis_lineatus	27.3	5.7	6.5	8.77	31.9	23.2	8.7	27.4	26.9	28.3	26	594	116	15	66	297	52	157	122
Anolis_lionotus	26.06	9	7.42	6.37	32.67	20.59	12.09	25.45	26.34	26.97	25.34	2509.22	427.64	16.55	67.16	1099.04	80.23	317.76	907.43
Anolis_longiceps	26.4	8.1	7.2	9.09	31.8	20.6	11.2	26.6	25.3	27.4	25.1	1679	230	63	37	578	216	425	286
Anolis_loveridgei	20.7	10.8	6.5	16.08	29.4	12.9	16.5	21.3	21.1	22.6	18.4	1432	216	28	55	559	115	401	173
Anolis_maculigula	19.33	10.19	8.68	3.44	25.36	13.68	11.68	18.97	19.44	19.73	18.86	2736.17	343.8	105.27	33.85	887.83	377.78	597.78	793.56
Anolis_marron	22.55	11.45	7.5	12.06	29.75	14.5	15.25	23.75	20.85	23.95	20.85	1609	252.5	37	53	630	129.5	510	129.5
Anolis_monticola	22.77	9.25	6.88	12.09	29.08	15.77	13.32	23.4	21.15	24.18	21.05	2002.5	317.17	65.33	47.83	746.33	237.83	521	252.67
Anolis_nubilis	26.6	6.5	6.7	10.95	31.3	21.6	9.7	27.6	25.6	27.7	25.1	1357	157	65	29	465	210	384	242
Anolis_occultus	22.73	10.05	7.33	12.51	29.18	15.55	13.63	23.95	21	24.1	21	1928.5	250.17	72.33	36.83	703	251.33	560.67	251.33
Anolis_oculatus	23.9	7.7	7.35	9.71	28.85	18.45	10.4	24.7	22.85	24.9	22.5	2491.5	289.5	112	31.5	848	359	821	384.5
Anolis_olssoni	25.13	11.48	7.44	11.88	32.45	17.14	15.31	25.99	23.56	26.47	23.4	1069.75	167.34	27.94	53.78	416.22	96.78	336.88	105.5
Anolis_pachypus	18.43	9.46	7.89	5.89	24.59	12.65	11.94	18.35	18.33	19.12	17.61	3171.67	475.83	68.64	52.58	1249.11	241.17	691.28	627.28
Anolis_pogus	26.9	5.9	6.5	11.23	31.2	22.2	9	27.6	25.7	28.1	25.3	1029	128	44	33	371	157	312	165
Anolis_quercorum	16.68	16.21	7.02	15.35	27.91	4.98	22.93	17.48	14.74	18.51	14.48	708.78	150.33	5.33	89.78	383.11	21	253.56	28.67
Anolis_semilineatus	23.94	11.04	7.36	12.39	31.04	16.16	14.89	24.7	22.45	25.31	22.15	1451.23	213.52	49.19	45.71	530.44	165.32	435.46	189.07
Anolis_sminthus	20.7	10.67	6.9	11.7	28.8	13.4	15.4	21.13	19.43	22.07	19.07	1425.67	268.33	14.33	77.67	671.67	50	293.33	96.67
Anolis_strahmi	25.6	10.9	7.4	11.87	32.7	18.1	14.6	26.8	23.9	27	23.9	881	137	24	55	372	84	299	84
Anolis_valencienni	24.03	7.22	6.89	9.87	29.21	18.79	10.42	24.71	22.76	25.14	22.65	1817.31	294.53	60.06	47.81	714.17	213.14	516.67	221.31
Anolis_ventrimaculatus	20.05	10.34	9.14	2.55	25.82	14.57	11.26	19.68	20.11	20.28	19.65	2364.71	305.15	124.21	30.26	784.35	429.29	568.29	777.59
Anolis_whitemani	24.89	11.35	7.45	11.33	31.99	16.88	15.11	25.88	23.35	26.15	23.21	996.94	157.82	20.94	58.88	406.12	74.35	334	76.24
Anomochilus_leonardi	25.09	10	8.74	4.8	30.84	19.48	11.36	24.85	25.05	25.59	24.39	2480.14	306.21	123.43	28.14	861	426.14	607.07	624.14
Aparallactus_capensis	20.55	13.12	5.92	30.02	30.57	8.2	22.37	23.28	16.64	23.72	16.23	808.2	165.06	7.33	85.17	449.93	28.63	324.12	35
Apathya_cappadocica	12.94	12.11	3.25	87.31	33.11	-3.74	36.85	5.37	23.87	23.97	1.64	588.02	97.56	3.24	68.36	267.19	14.61	19.92	245.75
Aphaniotis_fusca	25.52	8.48	8.81	3.2	30.49	20.89	9.59	25.29	25.5	25.86	25.08	2829.03	335.62	144.97	26.31	922.21	481.68	677.68	784.17
Aplopeltura_boa	25.51	8.58	8.49	4.2	30.74	20.61	10.13	25.28	25.41	25.97	24.93	2744.45	350.41	125.86	33.09	955.83	421.52	647.19	716.28
Aprasia_aurita	15.8	13.85	4.9	49.19	31.65	3.6	28.05	12.6	22.2	22.2	9.6	366	40	22	20	113	70	70	102.5
Archaeolacerta_bedriagae	12.64	6.37	2.93	53.16	24.78	3.48	21.3	10.23	19.58	19.83	6.51	701.72	96.72	12.44	45.22	268.72	65.28	84.33	235.78
Aristelliger_georgeensis	26.5	8.1	6.8	13.54	32	20.2	11.8	26.8	25.8	27.8	24.6	1342	197	29	49	557	110	397	279
Aristelliger_lar	24.76	9.9	7.29	12.04	31.23	17.75	13.47	25.19	23.77	26.1	23.06	1506.77	209.97	63.9	39.7	527.93	213.37	391.27	271.13
Arizona_elegans	17.29	15.69	4.53	68.87	34.68	-0.12	34.8	22.51	13.79	25.97	8.35	408.94	74.5	10.08	63.31	185.67	39.22	147.24	64.16
Arrhyton_taeniatum	24.81	9.91	6.41	18.54	32.17	16.82	15.35	26.42	22.37	26.94	22.22	1343.97	211.78	37.84	54.45	532.86	135.22	460.99	144.56
Arthrosaura_kockii	25.67	9.11	7.7	5.98	32.43	20.67	11.76	25.34	26.47	26.48	24.94	2381.86	380.29	57.17	50.38	980.42	210.17	229.54	696.85
Asaccus_platyrhynchus	22.41	10.1	4.01	51.41	34.65	9.75	24.9	19.37	22.61	28.44	15.48	149.27	40.33	0.6	87.6	85.4	12.07	26.67	55.53
Aspidoscelis_burti	20.95	16.69	5.16	58.51	36.89	4.67	32.22	27.86	21.72	28.25	13.51	438.66	119.11	3.76	94.99	274.51	20.57	244.34	77.34
Aspidoscelis_ceralbensis	23.32	14.48	5.52	46.61	35.66	9.7	25.96	29.26	24.26	29.26	17.52	253	66.6	0	108	174.8	1.8	174.8	32.8
Aspidoscelis_communis	25.5	13.7	6.94	15.77	34.64	14.98	19.66	26.62	24.55	27.3	23.28	1021.7	253.77	2.5	108.9	688.23	11.92	430.45	36.21
Aspidoscelis_deppei	25.39	11.14	6.84	13.58	33.56	17.35	16.22	25.88	24.91	26.95	23.5	1805.29	341.81	24.06	81.87	897.79	86.39	405.05	212.3
Aspidoscelis_gularis	19.14	14.4	4.51	62.81	34.47	2.34	32.13	24.02	12.93	26.71	10.61	602.35	100.37	20.47	55.02	242.62	75.89	191.54	82.24
Aspidoscelis_guttata	25.46	12	6.74	16.16	34.16	16.46	17.7	26.44	24.33	27.23	23.17	1337.46	295.02	14.33	95.03	759.83	49.44	363.12	71.63
Aspidoscelis_hyperythra	19.46	15.24	5.7	42.35	33.43	6.89	26.55	19.07	20.75	25.37	14.47	206.18	44.24	0.51	82.3	113.3	4.86	62.25	79.72
Aspidoscelis_inornata	16.91	16.84	5.06	60.37	33.18	-0.23	33.41	23.2	12.71	24.29	8.88	331.88	68.22	6.76	74.76	177.75	26.35	150.06	35.3
Aspidoscelis_laredoensis	22.57	12.88	4.21	61.2	36.85	6.65	30.2	27.11	15.84	29.75	14.08	537.37	98.28	16.52	53.5	211.51	66.34	157.92	73.1
Aspidoscelis_lineattissima	25.08	13.86	6.83	17.65	34.47	14.26	20.21	26.47	24.09	27.07	22.6	1059.09	271.78	2.6	111.49	732.9	13.2	483.96	38.14
Aspidoscelis_sexlineata	15.02	13.56	3.74	80.74	32.81	-3.43	36.24	19.76	9.15	25.12	4.27	976.13	122.99	46.18	35.18	330.39	160.17	284.97	194.17
Aspidoscelis_tigris	14.82	16.02	4.52	69.93	33.59	-2.02	35.61	16.74	16.01	23.87	6	304.31	53.93	7.08	56.26	138.86	28.56	89.36	79.9
Aspidoscelis_velox	10.24	16.77	4.24	79.72	30.92	-8.28	39.2	18.54	10.95	20.66	0.18	341.43	54.01	11.62	43.51	136.71	44.91	116.15	72.59
Asthenodipsas_vertebralis	25.51	8.5	8.84	3	30.46	20.87	9.58	25.31	25.47	25.81	25.1	2788.58	323.77	140.5	26.28	899.9	462.83	679.04	763.84
Atheris_barbouri	17.44	10.97	6.46	15.54	25.72	8.85	16.87	18.34	15.4	19.06	15.1	1154.76	245.71	2.43	97.95	656.29	12.69	321.55	14.67
Atheris_ceratophora	18.6	10.81	6.53	15.41	26.88	10.47	16.41	19.45	16.53	20.26	16.33	955.98	199.73	7.02	93.66	538.25	25.84	230.34	28.95
Atheris_chlorechis	26.01	10.18	7.13	10.11	33.63	19.31	14.33	25.44	26.17	27.27	24.7	2169.07	419.64	24.28	67.07	1024.1	122.65	341.1	839.29
Atlantolacerta_andreanskyi	11.45	15.78	4.31	65.85	31.71	-4.46	36.16	6.19	20.24	20.34	3.49	511.4	69.02	7.07	50.5	190.67	32.81	37.5	173.74
Atractaspis_irregularis	24.42	11.2	7.48	9.54	32.18	17.04	15.14	23.98	24.06	25.64	23.22	1515.78	250.61	23.52	62.1	647.05	100.74	335.49	377.89
Atractaspis_microlepidota	27.77	14.85	6.16	22.84	39.11	15.05	24.06	28.26	26.85	30.51	24.53	504.01	168.59	0	141.05	417.73	0.59	93.82	2.14
Atractaspis_micropholis	27.7	14.45	5.82	25.97	39.42	14.73	24.69	27.21	25.51	31.14	24.41	608.44	197.57	0.01	133.19	468.81	0.4	90.82	3.1
Atractus_albuquerquei	25.29	11.9	7.25	7.15	33.21	16.76	16.45	25.38	24.6	26	24.26	1937.66	319.41	17.27	68.27	893.56	74.74	375.76	341.01
Atretium_schistosum	25.79	10.68	4.41	40.61	37.63	12.9	24.73	27.51	21.86	30.51	20.04	1303.16	332.8	5.76	107.09	849.49	37.36	336.7	91.49
Atretium_yunnanensis	17.38	11.86	4.99	39.21	26.43	2.88	23.55	21.44	12.2	21.44	11.67	1434.81	301.45	13.55	84.69	816.99	51.84	813.02	53.3
Atropoides_nummifer	19.35	12.33	6.27	21.63	28.96	9.44	19.52	20.71	17.61	21.74	16.29	2062.97	414.94	42.32	77.09	1070.37	138.74	525.53	171.33
Atropoides_olmec	21.57	10.46	6.57	15.62	29.39	13.59	15.8	22.6	21.23	23.22	19.35	1769.68	319.21	31.37	73.53	845.16	109.37	424.05	184.84
Aurivela_longicauda	15.33	14.74	4.87	54.33	30.68	0.7	29.97	19.14	10.03	22.13	8.24	283.61	47.03	8.62	51.31	125.64	30.98	116.16	35.77
Australolacerta_australis	14.21	14.45	5.38	43.41	28.41	1.81	26.6	9.31	19.49	19.64	8.67	416.12	70.19	8.42	62.15	196.04	40.65	41.19	191.12
Bachia_bresslaui	23.86	12.25	6.82	15.24	31.78	13.94	17.84	24.93	21.99	25.25	21.53	1452.22	257.36	15.2	69.71	693.96	60.65	449.35	96.12
Bachia_flavescens	26.18	9.53	8.16	5.19	32.45	20.81	11.64	25.69	26.55	26.82	25.51	2388.37	351.62	79.57	48.01	964.25	278.12	350.68	804.52
Bachia_panoplia	26.86	8.91	8.53	2.79	32.26	21.87	10.39	26.66	27	27.17	26.44	2422.29	290.14	103	30.14	807.43	354.86	417.86	583.29
Bachia_trisanale	25.8	9.95	8.24	4.82	31.68	19.63	12.05	25.79	25.47	26.26	25.07	2578.7	301.28	116.93	30.07	852.06	398.45	615.37	522.83
Balanophis_ceylonensis	25.06	7.79	7.11	6.76	30.71	19.79	10.92	24.76	24.92	25.89	24.12	2708.04	379.71	97.09	40.3	970.32	365.41	735.61	641.23
Bamanophis_dorri	27.53	13.64	5.94	23.07	38.63	15.7	22.93	26.5	25.76	30.73	24.79	870.05	243	0.43	117.85	596.26	3.45	104.86	162.89
Barisia_herrerae	15.98	15.24	7.06	14.69	26.5	5.02	21.48	16.82	13.98	17.8	13.98	1155.4	239.6	7	98.8	693	30.6	332.8	32.6
Barisia_imbricata	16.7	16.19	6.33	29.12	29.06	3.6	25.46	19.25	15.31	20	12.64	703.1	158.03	7.45	89.26	417.89	31.16	285.15	59.19
Barisia_levicollis	12.24	18.41	5.3	56.25	29.51	-4.89	34.4	18.52	11.4	19.33	4.98	554.87	140.78	7.96	94.83	352.91	33.83	305.04	76.43
Barisia_rudicollis	15.13	13.93	6.67	15.89	25.23	4.47	20.77	15.8	14.23	17.03	12.87	1233	241	11	90.33	689.67	47.67	337.67	51.67
Basiliscus_basiliscus	25.3	9.79	8.28	4.53	31.37	19.56	11.8	25.04	25.27	25.83	24.69	2482.62	354.62	64.16	52.01	930.15	236.38	480.84	708.39
Basiliscus_plumifrons	25.42	8.24	7.08	8.84	31.36	19.82	11.54	25.71	25.4	26.37	24.12	2908.88	439.11	65.62	50.65	1177.29	242.15	647.78	569.3
Basiliscus_vittatus	25.12	10.69	6.61	16.91	33.11	16.88	16.24	26.14	24.4	26.94	22.71	1778.07	311.31	33.94	68.66	813.41	121.63	437.04	237.46
Bavayia_cyclura	21.79	7.28	5.38	22.42	28.27	14.86	13.41	24.59	19.95	24.59	18.82	1596.66	238.02	65.79	45.11	677.48	211.38	677.48	241.89
Bavayia_geitaina	20.85	7.27	5.23	24.08	27.65	13.84	13.81	23.87	19.92	23.87	17.65	1849.82	244.36	84.73	35.27	693.82	270.27	693.82	317.36
Bavayia_goroensis	21.6	6.9	5.1	23.69	28.2	14.8	13.4	24.6	20.7	24.6	18.5	2222	290	100	34	803	325	803	386
Bavayia_montana	21.81	7.26	5.41	22.03	28.21	14.9	13.31	24.56	19.62	24.56	18.89	1595.69	246.78	64.25	47.75	705.08	205.47	705.08	230.64
Bavayia_ornata	20.3	7.1	5.4	21.78	26.7	13.6	13.1	23	18.1	23	17.4	1846	286	66	52	843	223	843	251
Bavayia_pulchella	21.43	7.48	5.43	22.88	28.03	14.35	13.68	24.3	19.2	24.3	18.4	1478	226.5	64.25	44.5	630.5	203.25	630.5	229.5
Bavayia_sauvagii	21.75	7.28	5.36	22.54	28.25	14.79	13.45	24.56	19.97	24.56	18.76	1637.45	241.34	68.3	44.07	687.3	219.64	687.3	251.62
Bipes_biporus	21.23	15.15	5.94	37.85	34.47	9.24	25.22	22.65	20.86	26.62	16.81	118.17	26.44	0.1	79.59	61.93	1.15	54.28	37.6
Bipes_canaliculatus	25.85	14.09	6.9	14.23	35.81	15.49	20.33	26.5	25.15	27.59	23.87	881.7	209.91	2.57	105.57	552.26	11.61	249.26	33.22
Bipes_tridactylus	25.79	12.03	7.71	7.66	33.64	18.13	15.51	25.87	25.73	26.79	24.79	1302.43	340.86	3.29	109.57	831.43	13	363.86	32.43
Bitia_hydroides	26.74	8.36	7.32	6.87	32.74	21	11.74	26.4	26.41	27.67	25.91	3258.21	575.31	70.08	61.42	1648.22	260.34	611.08	395.52
Bitis_atropos	18.55	11.73	5.7	29.37	27.94	7.55	20.4	19.23	17.1	21.91	14.51	764.15	132.36	20.03	57.79	365.82	68.6	302.91	106.06
Bitis_peringueyi	23.51	7.85	5.49	21.21	30.02	15.88	14.14	25.68	20.73	25.74	20.43	399.26	116.9	0.02	110.71	248.93	0.3	248.06	1.24
Blaesodactylus_antongilensis	23.1	8.94	6.43	19.7	29.82	16.04	13.78	25.27	21.81	25.32	20.38	2237.22	345.69	65.72	52.48	969.97	252.36	960.22	344.88
Blaesodactylus_boivini	25.63	9.97	7.04	12.11	32.07	18	14.06	26.52	24.02	26.69	23.8	1506.69	384.62	11.08	105.96	977.54	42.27	678.42	45.73
Blaesodactylus_sakalava	25.28	12.37	6.58	20.2	33.43	14.71	18.72	27.09	22.53	27.31	22.29	1079.49	303.95	3.58	109.88	738.76	15.23	476.35	18.45
Blanus_cinereus	14.3	10.81	3.81	59.3	30.52	2.43	28.09	10.56	21.59	22.24	7.11	571.87	78.5	9.27	45.97	216.69	48.86	53.34	195.44
Blanus_mettetali	16.96	13.17	4.52	52.08	32.52	3.72	28.8	11.72	23.57	23.9	10.48	397.71	63.82	1.46	66.69	171.12	11.57	14.46	163.94
Blanus_strauchi	13.9	11.57	3.48	76.62	32.02	-0.94	32.96	4.93	23.54	23.67	4.15	667.9	121.8	5.39	70.5	328.52	22.91	28.92	322.85
Blanus_tingitanus	17.65	11.67	4.16	53.43	32.96	5.15	27.81	11.48	24.55	24.75	10.99	708	124.49	0.79	73.88	341.59	13	16.73	337.14
Bogertophis_rosaliae	20.38	15.42	5.68	44.38	34.22	7.26	26.96	22.48	20.81	26.45	15.04	200.39	49.08	0.27	87.63	117.92	3.21	106.48	54.18
Bogertophis_subocularis	18.33	15.94	4.84	61.59	33.94	1.17	32.78	24.37	13.26	25.74	10.03	330.54	66.54	6.72	74.22	172.02	26.47	143.4	33.29
Boiga_beddomei	25.26	9.31	5.75	16.85	33.47	17.14	16.32	24.81	24.51	27.67	23.31	2396.48	808.9	4.67	117.42	1729.74	25.05	309.29	522.39
Boiga_cynodon	25.48	8.6	8.5	4.15	30.71	20.57	10.14	25.26	25.38	25.93	24.91	2752.65	350.42	126.91	32.88	956.3	424.57	651.15	718.69
Boiga_forsteni	25.96	11.54	4.87	36.15	37.78	13.3	24.48	27.1	23.32	30.39	20.97	1104.44	321.9	3.77	116.27	756.27	22.78	197.09	130.01
Boiga_kraepelini	17.47	8.09	3.01	67.25	30.62	3.47	27.16	23.17	9.65	25.59	8.35	1441.74	251.24	31.94	62.64	676.03	115.84	597.1	134.11
Boiga_trigonata	17.66	13.72	3.94	74.47	35.22	0.07	35.15	13.89	22.49	26.87	7.67	515.66	121.88	3.52	88.04	302.51	18.56	147.44	94.92
Bothriechis_aurifer	19.28	10.29	7.12	11.7	26.27	11.94	14.33	20.17	18.72	20.47	17.54	2294.14	372.18	58.82	61.86	993.77	197.95	671.23	246.18
Bothriechis_bicolor	17.21	12.08	7.22	11.06	25.08	8.43	16.65	17.86	15.9	18.36	15.58	1839.45	359	12.36	83.95	886.41	47.73	641.14	58.64
Bothriechis_rowleyi	21.3	11.85	6.9	16.21	29.6	12.55	17.05	22.25	21.1	22.95	18.95	1738.5	274.5	45	62	745	164.5	397.5	239
Bothrochilus_boa	24.64	7.34	8.41	4.36	29.18	20.49	8.69	24.39	24.74	25.01	23.96	3403.73	429.18	188.74	26.67	1173.81	625.9	863.42	970.93
Bothrops_erythromelas	24.26	11.53	7.29	11.7	32	16.27	15.74	24.66	23.32	25.5	22.57	808.67	171.5	5.55	85.08	444.79	23.06	191.89	92.9
Bothrops_itapetiningae	23.57	12.18	6.8	15.46	31.48	13.67	17.8	24.68	21.67	24.98	21.2	1434.31	261.74	13.6	73.11	706.17	52.02	450.51	84.59
Bothrops_jararacussu	21.57	11.83	6.25	23.74	30.1	11.31	18.79	23.91	18.6	24.19	18.24	1385.63	215.41	38.25	51.97	585.42	142.23	535.05	168.67
Brachylophus_fasciatus	24.1	6.3	6.2	13.59	29.5	19.4	10.1	25.8	22.5	25.8	22.3	2096	305	96	37	793	319	793	320
Brachylophus_vitiensis	23.59	6.31	6.19	13.26	28.98	18.86	10.11	25.19	21.87	25.21	21.81	2461.86	357.23	100.55	43.09	988.32	333.05	988	340.77
Brachymeles_bicolor	22.74	8.52	6.57	12.13	29.07	16.18	12.89	22.62	21.64	24.12	20.94	2853.55	477.72	65.45	54.67	1225.11	254.19	677.12	389.66
Brachymeles_bonitae	25.49	7.27	7.15	7.89	30.96	20.83	10.13	25.29	25.02	26.53	24.45	2534.17	448.94	31.43	66.8	1189.49	126.83	514.03	269.77
Brachymeles_boulengeri	25.51	8.19	6.93	10.09	31.58	19.74	11.85	25.37	24.83	26.71	24.08	2509.93	438.25	50.46	61.26	1145.69	185.79	563.86	350.34
Brachymeles_cebuensis	26.07	8.33	7.85	6.02	31.6	21.07	10.53	25.95	25.83	26.78	25.2	1856.83	225.67	63.17	33	622.33	237.33	389.17	400.17
Brachymeles_elerae	25.44	8.5	7.51	7.82	31.29	19.95	11.34	25.22	25.07	26.35	24.35	2537.5	397.27	76.79	50.35	1057.8	265.19	558.34	518.39
Brachymeles_gracilis	25.12	9.06	8.29	4.95	30.75	19.89	10.86	24.83	25.16	25.65	24.43	2639.47	347.26	122.31	33.06	947.07	404.25	584.18	720.77
Brachymeles_minimus	25.85	7.9	7.45	8.91	31.1	20.6	10.5	25.5	26.25	26.8	24.6	4155	744	136	54	1953.5	550	717	1243.5
Brachymeles_pathfinderi	24.89	9.93	8.41	3.61	31.08	19.35	11.74	24.73	24.93	25.35	24.45	1881.02	222.96	92.24	28.29	632.67	297.43	426.29	526.16
Brachymeles_samarensis	26.05	7.78	7.74	7.81	31.15	21.13	10.01	25.45	26.17	26.81	24.9	2946.24	423.34	128.1	38.43	1153.17	433.29	574.17	959.75
Brachymeles_schadenbergi	25.12	9.07	8.29	4.94	30.75	19.89	10.86	24.83	25.16	25.65	24.44	2636.28	346.72	122.08	33.08	945.73	403.46	583.77	718.33
Brachymeles_talinis	25.87	7.74	7.42	7.43	31.44	21.02	10.41	25.79	25.58	26.81	24.86	2531.36	370.29	51.69	51.65	1016.5	193.57	553.85	369.56
Brachymeles_tridactylus	26.15	7.75	7.66	6.32	31.64	21.58	10.06	26.02	26.02	27	25.33	2488.77	369.51	52.61	52.39	1011.22	188.69	531.14	351.93
Brachyophidium_rhodogaster	21.65	7.87	6.28	11.98	27.89	15.41	12.49	21.58	21.04	23.2	20.01	1663.08	300.08	24.92	58.92	712.85	100.85	376.15	288.31
Bradypodion_caffer	18.73	8.15	5.63	20.91	25.2	10.83	14.38	21.43	16.03	21.43	16.03	1055.5	135.25	31.75	41	378	114.75	378	114.75
Bradypodion_dracomontanum	14.33	13.96	5.6	37.67	24.82	0.01	24.81	18.34	9.02	18.5	9	933.27	159.91	10.55	68.27	439.64	46.36	438.82	46.45
Bradypodion_setaroi	21.98	10.67	5.57	26.61	30.59	11.63	18.96	25.16	18.38	25.16	18.29	869.25	133.71	29.54	48.79	352.04	99.12	351.79	99.62
Bradypodion_taeniabronchum	16.46	10.85	5.6	27.71	25.44	6.26	19.18	15.66	15.88	19.96	12.86	607.16	64.88	37.56	16.8	178.72	122.16	146.04	141.72
Bradypodion_transvaalense	18.55	12.94	5.91	31.09	27.51	5.75	21.76	21.83	14.05	21.87	14.05	852.05	153.28	9.88	75.7	432.08	35.21	431.57	35.21
Bradypodion_ventrale	16.25	14.32	5.67	36.76	28.34	3.27	25.07	19.8	11.77	20.72	11.3	484.22	64.43	19.07	36.87	172.49	66.59	161.32	68.37
Brookesia_ambreensis	23	9.4	7.3	12.99	28.9	16.1	12.8	24.2	21.8	24.2	21.1	1399	346	13	103	890	55	890	59
Brookesia_antakarana	23	9.4	7.3	12.99	28.9	16.1	12.8	24.2	21.8	24.2	21.1	1399	346	13	103	890	55	890	59
Brookesia_betschi	20.63	11.68	7.02	18.83	28.4	11.91	16.49	22.52	18.2	22.53	17.93	1639.64	329.09	28.94	83.12	904.76	106.61	880.88	116.12
Brookesia_bonsi	25.88	11.4	6.9	14.43	32.75	16.3	16.45	26.78	23.63	27.13	23.63	1360	408	2	121.5	974.25	9.5	693	9.5
Brookesia_brygooi	25.22	12.97	6.59	20.15	33.71	14.12	19.59	26.95	22.32	27.19	22.2	1104.82	314.19	2.08	115.45	764.68	10.1	499.84	10.23
Brookesia_decaryi	26.38	12.85	6.85	13.85	35	16.33	18.68	27.15	24.35	27.75	24.25	1511.25	447.75	1.25	120.5	1062.25	5.25	488.75	5.25
Brookesia_dentata	26.58	12.74	6.86	13.7	35.14	16.66	18.48	27.26	24.54	27.96	24.46	1532.8	450.2	1	120.2	1073.6	5.4	478.4	5.4
Brookesia_ebenaui	24.03	10.47	7.07	13.99	30.72	16.02	14.7	25.22	22.12	25.29	21.97	1574.49	362.05	16.63	97.28	964.58	61.47	801.65	66.02
Brookesia_exarmata	24.71	12.66	6.54	18.45	33.1	13.86	19.24	26.09	21.93	26.33	21.8	1319	348.43	2	108.86	876.29	12	401.57	12
Brookesia_griveaudi	23.18	9.24	6.65	18.27	29.82	16.04	13.78	25.13	21.77	25.19	20.61	1896.69	293.43	56.45	54.43	827.98	214.2	817.32	283.34
Brookesia_karchei	20.4	10.9	6.9	20.71	28	12.3	15.7	22.7	18.2	22.7	17.5	1717	295	50	62	825	188	825	209
Brookesia_lineata	20.64	12.04	7.12	16.64	28.46	11.7	16.76	22.18	18.26	22.18	18.22	1567	352.8	13	99	953.4	44.2	885	49.6
Brookesia_minima	23.57	10.91	7.12	13.99	30.41	15.22	15.19	24.72	21.51	24.82	21.5	1735.39	417.33	12.78	100.39	1076.67	44.22	857.33	46.39
Brookesia_perarmata	25.4	12.6	6.5	18.87	33.8	14.5	19.3	26.8	22.9	27.1	22.4	1263	340	2	110	850	12	380	12
Brookesia_peyrierasi	22.78	8.03	6.09	19.92	29.38	16.33	13.04	24.89	21.75	25.11	20.03	2498.25	337.08	76.5	40.5	957.33	289.5	938.33	454.17
Brookesia_stumpffi	25.33	10.88	6.91	14.39	32.36	16.67	15.68	26.41	23.38	26.65	23.16	1554.55	400.37	12.89	105.06	998.8	48.62	672.25	53.64
Brookesia_superciliaris	20.95	10.16	6.36	23.5	28.58	12.72	15.85	23.5	18.84	23.54	17.68	1967.72	346.07	50.5	67.53	966.28	188.75	951.81	240.24
Brookesia_therezieni	20.64	10.62	6.58	23.18	28.47	12.44	16.03	23.15	18.28	23.16	17.41	1713.95	321.05	39.18	73.99	891.87	152.55	891.08	178.31
Brookesia_thieli	19.71	10.97	6.52	23.97	27.76	11.06	16.71	22.26	17.16	22.27	16.34	1677.09	326.84	34.79	78.6	895.81	131.02	886.72	153.56
Brookesia_tuberculata	23	9.4	7.3	12.99	28.9	16.1	12.8	24.2	21.8	24.2	21.1	1399	346	13	103	890	55	890	59
Brookesia_vadoni	21.66	9.89	6.54	21.21	29.09	14.14	14.95	23.96	19.94	24	18.66	2093.74	337.46	57.09	58.63	948.87	216.72	945.72	293.17
Brookesia_valerieae	22.6	11.53	7.07	15.36	29.97	13.8	16.17	23.95	20.38	23.97	20.37	1696	396.33	13.67	100.17	1047.5	47.17	924.5	49.17
Bungarus_candidus	25.38	9.62	6.76	13.38	32.5	17.52	14.98	25.73	23.86	26.87	23.45	2041.45	343.45	48.01	63.98	909.73	172.15	524.92	326.42
Bungarus_fasciatus	23.83	10.86	4.25	42.72	35.42	9.93	25.48	26.32	18.59	28.75	17.77	1694.06	413.04	5.21	106.5	1080.85	34.1	612.44	40.59
Bungarus_flaviceps	25.51	8.61	8.5	4.08	30.76	20.55	10.21	25.3	25.38	25.96	24.95	2730.27	343.03	126.2	33	941.35	422.84	646.8	709.81
Bungarus_multicinctus	18.43	8.94	3.68	55.73	29.9	5.04	24.87	23.05	11.8	24.94	10.75	1501.62	282.21	26.49	70.85	757.07	98.95	656.09	115.55
Bunopus_crassicauda	14.5	14.38	3.49	90.71	35.77	-4.85	40.62	5.8	25.36	25.93	2.51	203.05	40.34	0.75	75.93	99.83	4.95	6.2	77.83
Bunopus_tuberculatus	21.83	14.05	4.1	72.98	39.08	4.88	34.19	14.57	29.38	30.74	12.06	123.05	28.12	0.21	92.21	70.07	1.68	4.25	62.03
Calamaria_pavimentata	21.69	9.73	5.25	32.17	30.66	10.73	19.93	24.23	17.83	25.29	17.14	1802.78	333.33	30.24	73.37	894.31	111.3	642.11	182.43
Calamaria_yunnanensis	18.16	11.22	4.9	39.53	27.46	4.77	22.69	22.41	13.78	22.41	12.51	1059.14	216	13.14	84.21	605	44.21	605	44.86
Caledoniscincus_aquilonius	21.72	7.13	5.43	21.35	27.98	14.98	13.01	24.38	19.58	24.38	18.88	1732.08	273.42	63.17	52.08	793.17	208.25	793.17	232.75
Caledoniscincus_atropunctatus	21.98	7.27	5.41	21.95	28.43	15.1	13.33	24.73	20.17	24.73	19.08	1616.77	241.63	65.76	44.58	681.06	214.07	681.06	245.82
Caledoniscincus_auratus	22.9	7.2	5.55	21.09	29.05	16.1	12.95	25.5	20.8	25.5	20.1	1337.5	213.5	49.5	51.5	607.5	162	607.5	185
Caledoniscincus_austrocaledonicus	21.92	7.3	5.38	22.38	28.39	14.95	13.44	24.71	20.1	24.71	18.95	1621	239.09	66.92	44.06	679.38	216.63	679.38	248.95
Caledoniscincus_chazeaui	21.54	7.04	5.38	21.43	27.78	14.82	12.96	24.22	19.38	24.22	18.68	1944.4	303.4	74.8	51	886.6	237	886.6	260.8
Caledoniscincus_festivus	21.74	7.29	5.38	22.48	28.23	14.8	13.44	24.55	19.89	24.55	18.76	1593.07	237.91	65.63	45.2	677.76	210.8	677.76	240.89
Caledoniscincus_haplorhinus	21.92	7.3	5.38	22.38	28.39	14.95	13.44	24.71	20.1	24.71	18.95	1621	239.09	66.92	44.06	679.38	216.63	679.38	248.95
Caledoniscincus_orestes	21.15	7.47	5.4	22.97	27.82	14.1	13.72	24	18.9	24	18.1	1580	236.5	66	44.83	677.17	213	677.17	239.67
Caledoniscincus_renevieri	21.65	7.15	5.35	21.85	28	14.75	13.25	24.4	19.45	24.4	18.75	1655.5	259	68.5	48	732.5	213	732.5	239
Caledoniscincus_terma	22	7.25	5.5	21.18	28.3	15.25	13.05	24.65	19.9	24.65	19.2	1485.5	240.5	49	54.5	695.5	172	695.5	196.5
Calliophis_bivirgata	25.5	8.59	8.69	3.43	30.6	20.72	9.87	25.28	25.45	25.87	25.03	2787.1	339.98	135.93	29.47	933.78	453.4	667.06	749.87
Callisaurus_draconoides	17.49	16.18	4.76	65.83	35.56	1.29	34.27	18.65	20.08	26.12	9.37	259.82	52.84	4.28	60.73	129.77	19.56	102.58	65.23
Calodactylodes_aureus	25.96	9.85	4.65	30.71	36.28	15.18	21.1	26.31	22.47	29.85	21.69	1180.97	269.28	4.94	91.17	693.42	24.95	246.11	92.53
Calotes_chincollium	19.06	8.76	4.47	29.45	27.76	8.36	19.4	21.09	15.83	21.93	14.61	1952.38	400.56	4.31	89.92	1081.46	27.58	612.69	30.77
Calumma_boettgeri	21.2	11.3	7.04	16.28	28.64	12.78	15.86	22.72	18.86	22.74	18.82	1621.6	357.6	16.2	96.8	972	55	964.6	60.4
Calumma_brevicorne	20.2	10.97	6.54	23.8	28.17	11.5	16.67	22.75	17.75	22.77	16.86	1668.18	318.17	37.39	75.35	876.73	140.32	868.97	165.18
Calumma_capuroni	20.13	11.87	6.53	24.93	28.5	10.47	18.03	23	17.2	23	16.63	1033	185.33	31	66.33	515.33	103	515.33	116
Calumma_crypticum	19.49	11.38	6.49	23.96	27.71	10.31	17.39	21.99	16.64	22.01	16.07	1522.61	310.49	28.39	83.72	844.14	102.56	830.05	115.93
Calumma_cucullatum	21.58	9.83	6.5	22.27	28.97	13.97	15.01	24.06	19.63	24.06	18.5	1987.37	338.56	53.25	63.1	962.37	202.1	962.37	249.58
Calumma_fallax	20.33	9.88	6.07	24.55	27.75	11.6	16.15	22.95	18.18	23	16.85	1775	333.5	47.83	75	934.5	161.17	900.5	201.17
Calumma_furcifer	19.7	10.78	6.38	25.75	27.78	10.98	16.8	22.5	17.4	22.5	16.15	1963.25	346.25	53.5	67.25	982.5	196.5	982.25	250.75
Calumma_gallus	21.95	9.77	6.27	23.79	29.36	13.9	15.46	24.62	19.88	24.62	18.67	2312.83	395.08	65.33	59.33	1110	257.33	1109.92	322.17
Calumma_gastrotaenia	19.8	11.74	6.57	22.82	28.17	10.45	17.71	22.08	16.93	22.16	16.52	1491.92	331.99	19.08	93.42	876.8	69.26	790.97	78.08
Calumma_globifer	18.15	11.55	6.6	24.47	26.25	8.9	17.35	20.65	14.7	20.7	14.7	1410	321	16.5	94.5	840.5	64	824.5	70.5
Calumma_guibei	19.9	12.3	7.1	17.61	28	10.83	17.17	21.57	17.4	21.57	17.33	1517.33	327.67	14.33	96.67	905.67	47.67	905.67	55.67
Calumma_hilleniusi	19.4	11.63	6.37	22.56	27.73	9.67	18.07	21.57	16.5	21.67	16.03	1318	296.33	16.67	94	793.67	54.67	632.67	57.67
Calumma_malthe	20.13	10.93	6.62	22.94	28.06	11.67	16.39	22.59	17.68	22.6	16.93	1692.99	318.98	37.48	75.69	888.01	140.7	882.5	162.84
Calumma_nasutum	20.69	11.24	6.61	21.99	28.67	11.76	16.9	22.95	18.08	22.98	17.55	1556.3	322.11	26.76	85.59	865.96	98.77	826.25	115.4
Calumma_oshaughnessyi	19.41	10.94	6.28	25.44	27.47	10.17	17.3	22.11	16.85	22.15	15.8	1582.67	304.22	38.15	75.68	831.68	131.43	817.08	153.62
Calumma_parsonii	19.72	10.94	6.56	23.4	27.71	11.16	16.56	22.21	17.32	22.23	16.44	1686.68	322.02	36.87	77.01	889.21	136.03	882.32	160.74
Calumma_tsaratananense	19.9	12.3	7.1	17.61	28	10.83	17.17	21.57	17.4	21.57	17.33	1517.33	327.67	14.33	96.67	905.67	47.67	905.67	55.67
Calyptommatus_confusionibus	26.23	12.58	7.79	7.43	34.3	18.23	16.07	26.01	25.71	27.27	25.3	904.56	162.22	1.89	81.78	444.44	9.89	179.11	102.67
Cantoria_violacea	26.65	7.84	6.54	7.83	32.97	20.92	12.05	26.33	26.27	27.77	25.82	3670.41	708.43	28.24	81.58	2014.75	114.32	626.36	449.71
Caraiba_andreae	24.97	10.17	6.47	17.95	32.38	16.79	15.59	26.5	22.5	27.03	22.4	1339.65	208.35	31.76	57.37	531.39	115.39	469.88	120.11
Carlia_bicarinata	26.17	8.98	6.5	14.39	32.96	19.1	13.86	27.17	24.54	27.74	24.03	1604.42	360.75	10.8	100.59	1020.33	40.91	630.98	53.16
Carlia_dogare	25.55	7.65	5.8	19.34	31.8	18.65	13.15	27.35	24.45	27.65	22.75	1760.5	394	17.5	94.5	1094.5	57.5	917	92
Carlia_gracilis	27.16	12.66	5.66	29.21	36.9	14.63	22.27	29.02	23.09	30.2	22.77	982.26	249.67	0.95	111.49	663.65	8.79	313.95	9.97
Carlia_rubrigularis	22.84	11.16	5.7	27.97	31.71	12.29	19.42	25.4	19.9	25.88	18.81	1329.28	293.88	17.25	95.19	812.95	57.26	627.51	71.64
Carlia_tetradactyla	16.13	13.63	4.77	52.71	30.69	2.38	28.31	18.08	14.74	22.72	9.22	754.22	93.96	38.64	26.38	255.76	134.41	221.48	169.36
Carphophis_amoenus	13.97	12.68	3.66	78.73	30.89	-3.44	34.33	16.66	11.82	23.79	3.45	1248.72	133.83	76.17	16.09	369.99	253.03	327.66	306.86
Celatiscincus_euryotis	22.5	6.8	5.1	23.22	28.8	15.7	13.1	25.4	21.5	25.4	19.4	1950	249	89	32	688	289	688	351
Celatiscincus_similis	22.1	7.2	5.4	21.37	28.4	15.3	13.1	24.8	20	24.8	19.3	1357	218	48	52	620	165	620	188
Celestus_enneagrammus	16.87	12.79	6.7	16.71	26.26	7.35	18.91	17.64	15.7	18.82	14.51	1859.76	360.62	33.76	79.97	980.86	112.14	451	164.95
Cemophora_coccinea	16.82	12.81	3.93	71.77	32.59	0.05	32.54	18.26	16.67	25.71	7.21	1285.33	149.09	70.34	22.32	405.48	241.51	347.46	310.06
Cerastes_gasperettii	24.45	13.42	4.5	61.05	39.27	9.21	30.05	20.07	30.26	31.68	16.19	95.35	23.67	0.2	95.07	53.96	1.93	5.46	34.39
Cerastes_vipera	24.19	15.23	4.58	62.95	40.51	7.25	33.26	23.44	24.55	31.71	15.62	44.13	13.52	0.09	78.18	29.72	0.88	10	9.34
Ceratophora_aspera	25.59	7.23	7.14	5.69	30.77	20.69	10.07	25.56	25.37	26.33	24.83	3042.1	412.55	110.39	37.45	1041.35	418.16	879.1	665.81
Cerberus_australis	26.91	12.27	5.87	27.41	36.4	15.25	21.14	28.85	23.38	29.82	22.84	1082.33	247.25	8.08	105.96	667.87	31.87	396.4	34.96
Cerberus_microlepis	26.3	8	6.75	10.29	32.53	20.77	11.76	26.29	26.13	27.6	24.82	2511.1	376.2	46.5	57.9	1065.8	160.1	507.4	385.6
Cerberus_rynchops	26.22	9.32	6.53	15.54	33.82	18.47	15.35	26.23	24.92	28.02	24.05	2026.43	374.6	53.77	66.96	936.74	190.87	435.43	403.51
Cercosaura_argulus	25.99	10.05	7.83	5.63	32.54	19.64	12.9	25.82	25.87	26.62	25.22	2337.44	323	73.52	46.18	900.91	261.85	434.98	585.83
Cercosaura_schreibersii	22.56	12.42	6.27	21.72	32.09	12.12	19.97	23.72	20.77	24.97	19.55	1436.77	234.52	26.92	61.66	643.55	96.31	407.27	120.78
Cerrophidion_petlalcalensis	15.95	13.6	6.85	16.61	25.65	6.05	19.6	16.8	14.6	17.8	13.6	1480	288	25	81	790.5	88	376.5	130
Cerrophidion_tzotzilorum	15.98	12.91	7.36	11.52	24.44	6.98	17.47	16.87	14.88	17.11	14.28	1346.33	232.67	28.22	69.44	598.78	96.44	463.44	113.11
Chalarodon_madagascariensis	24.09	13.94	6.45	25.81	33.51	12.08	21.43	26.7	20.69	26.76	20.33	805.07	204.69	6.17	102.12	523.8	23.35	444.82	27.98
Chalcides_bedriagai	13.86	10.95	3.77	60.94	30.35	1.65	28.7	10.94	20.6	22.02	6.48	534.85	72.18	11.31	42.17	195.58	54.44	60.51	167.01
Chalcides_chalcides	14.27	8.43	3.27	59.51	28.39	3.11	25.28	11.57	20.91	22.07	7.02	685.46	93.69	23.01	39.47	253.64	89.25	101.47	208.55
Chalcides_colosii	16.29	10.97	4.1	50.86	30.86	4.43	26.44	10.33	22.91	23.11	10.02	720.19	122.26	1.09	73.67	350.56	14.04	19.07	344.13
Chalcides_guentheri	18.57	10.51	4.14	55.73	31.63	6.5	25.12	11.32	25	25.19	11.27	598.02	149.37	0.11	106.65	388.04	0.46	1.48	377.02
Chalcides_lanzai	11.78	14.38	4.08	64.44	31.56	-3.19	34.76	7.81	20.46	20.54	4.06	635.88	85.31	8.56	49.19	231.56	43.44	47.94	213.44
Chalcides_manueli	18.23	9.95	4.9	33.05	27.51	7.35	20.16	14.75	22.03	22.47	13.78	241.25	46.17	0.12	80.29	125.17	2.62	6	119.5
Chalcides_mauritanicus	17.58	7.87	3.48	49.3	29.4	7.22	22.18	12.48	23.83	24.29	11.68	390.78	63.44	1.28	62.78	174.89	12.28	20.44	160.11
Chalcides_minutus	13.88	12.85	4.1	60.15	31.3	0.36	30.93	10.18	21.79	22	6.59	389.71	52.64	5.84	46.75	140.49	28.4	34.8	126.89
Chalcides_mionecton	17.87	11.81	4.54	46.64	31.29	5.52	25.78	12.92	23.65	24.01	11.93	303.87	52.7	0.64	70.61	140.99	6.18	9.73	134.01
Chalcides_montanus	10.86	16.33	4.29	68.89	32.01	-5.61	37.61	4.92	20.11	20.2	2.6	484.79	65.76	7.26	49.02	182.05	32.4	39.05	163
Chalcides_parallelus	17.8	8.4	3.69	47.61	29.63	7.33	22.3	12.78	23.81	24.33	12.11	369.12	57.5	1.25	60.62	157.5	12.12	19.88	152.25
Chalcides_polylepis	17.01	12.99	4.47	52.75	32.76	3.87	28.89	11.81	23.74	24.04	10.46	447.57	73.14	1.8	67.34	194.43	13.61	16.58	186.67
Chalcides_pseudostriatus	16.87	13.25	4.41	55.01	33.37	3.64	29.74	11.27	23.96	24.24	10.11	587.37	98.23	1.8	68.66	262.1	15.72	19.05	254.56
Chalcides_sepsoides	20.99	14.96	4.8	57.95	35.8	5.03	30.76	14.79	22.41	27.73	13.05	25.6	6.38	0	59.56	15.84	0.03	0.08	15.38
Chalcides_sexlineatus	18.12	7.45	4.87	26.13	26.77	11.53	15.23	15.95	20.97	21.67	15	239.67	49.67	0.67	84.67	134.5	3.33	9.17	112.33
Chalcides_sphenopsiformis	21.99	11.45	5.47	31.4	32.57	11.62	20.96	22.28	22.28	26.02	17.82	59.14	17.89	0.02	89.99	40.53	1	25.61	15.01
Chalcides_striatus	13.49	10.23	3.79	56.81	28.85	2.1	26.75	10.05	20.07	21.04	6.55	676.82	89.62	17.19	40.6	246.1	76.08	81.47	221.39
Chalcides_viridanus	16.78	7.04	4.36	29.94	25.94	9.9	16.04	14.24	20.3	21	13.36	388.8	79.2	0.8	84.6	216.6	5.6	12	188.8
Chamaeleo_africanus	26.14	15.01	5.55	39.07	39.13	11.79	27.34	26.6	22.58	30.69	20.75	372.12	102.25	0.51	112.65	243.8	2.92	56.22	87.62
Chamaeleo_arabicus	22.48	11.45	5.46	30.6	32.54	11.76	20.78	22.05	22.67	26.09	18.37	118.88	29.63	0.84	79.9	63.42	6.65	38.33	21.98
Chamaeleo_calcaricarens	20.01	13.93	6.95	16.47	29.99	9.96	20.03	20.34	18.48	22.05	17.91	885.19	233.35	7.68	93.39	540.47	34.58	188.85	216.77
Chamaeleo_calyptratus	21.24	13.94	5.91	32.66	32.68	9.24	23.44	22.4	19.57	25.27	16.91	253.49	60.23	3.51	79.9	133.37	18.28	89.75	27.69
Chamaeleo_chamaeleon	18.24	12.19	4.28	57.24	33.48	4.89	28.59	13.65	24.96	25.61	11	314.43	54.96	2.79	67.11	144.06	16.24	22.75	129.36
Chamaeleo_dilepis	22.66	12.76	6.85	17.99	31.69	12.47	19.22	23.75	20.46	24.55	20.07	1051.4	188.71	12.38	79.49	495.89	52.34	308.82	112.18
Chamaeleo_gracilis	24.6	12.26	7.15	11.72	33.3	15.92	17.38	24.3	23.82	26.09	23.13	1225.41	223.93	13.19	78.09	574.26	58.19	266.01	259.05
Chamaeleo_laevigatus	24.78	12.7	7.31	11.48	33.8	16.01	17.79	24.27	24.18	26.31	23.38	1198.11	203.66	19.9	75.09	540.51	78.97	232.75	300.88
Chamaeleo_monachus	25.48	7.77	5.53	19.27	33.06	19.08	13.98	23.44	27.83	27.83	23.16	95.1	21	2.1	61.4	43.3	9.8	9.8	26.1
Chamaeleo_namaquensis	18.74	14.69	5.94	35.04	30.36	5.61	24.75	20.85	16.03	22.72	13.87	204.85	48.76	1.92	88.89	128.25	7.73	78.89	16.29
Chamaeleo_necasi	26.83	9.94	7.29	12.07	34.49	20.93	13.56	26.69	27.44	28.31	25.11	1241	183.43	14.29	55.43	484.14	77.57	277.14	390
Chamaeleo_senegalensis	27	13	6.2	19.42	37.38	16.31	21.07	26.04	25.84	29.68	24.69	1029.51	249.23	2.17	105.14	624.92	13.15	144.37	262.24
Chamaeleo_zeylanicus	26.16	11.74	4.65	37.59	38.93	13.29	25.64	26.89	23.76	31.04	21.13	1074.53	318.91	2.68	119.91	767.58	16.03	175.72	84.25
Charina_bottae	6.22	14.41	3.98	73.31	26.69	-9.24	35.93	1.99	12.11	15.83	-2.9	630.12	91.73	19.5	37.91	256.53	73.61	90.66	230.82
Chilomeniscus_stramineus	21.28	15.87	5.27	54.77	36.65	6.42	30.23	25.94	22.61	28.48	14.53	202.49	45.71	1.2	77.68	108.81	6.7	95.52	53.42
Chionactis_occipitalis	18.42	15.74	4.29	74.84	37.78	1.42	36.35	18.45	21.86	28.23	9.22	176.07	28.57	2.7	50.88	71.05	14.27	42.58	61.16
Chioninia_delalandii	21.4	6.9	6.33	14.15	26.57	15.73	10.83	23.2	20.47	23.2	19.57	348.67	142	0	152	296.67	0.33	296.67	6.33
Chioninia_fogoensis	19.2	4.5	5.05	16.53	23.65	14.8	8.85	21.35	18.55	21.35	17.15	287	103.5	0	122.5	207.5	0.5	207.5	22
Chioninia_spinalis	22.28	6.47	5.68	16.28	27.9	16.6	11.3	24.43	20.9	24.43	20.27	224.5	94.5	0	157	191.67	0.17	191.67	4.33
Chioninia_stangeri	23.23	4.38	5.13	15.56	27.52	19.03	8.48	25.22	21.98	25.22	21.27	140	69.83	0	158.17	114.5	0	114.5	5.17
Chioninia_vaillantii	22.1	7	6.3	14.58	27.4	16.3	11.1	24	21.2	24	20.2	367	149	0	151	315	0	315	4
Chironius_monticola	15.25	11.87	8.22	6.64	22.31	7.65	14.66	15.51	14.54	15.91	14.25	1466.33	207.12	53.96	47.07	567.15	187.84	412.13	313.03
Chlamydosaurus_kingii	25.57	12.63	5.64	32.16	35.6	13.1	22.5	28.23	21.57	29.03	20.87	960.41	224.54	9.13	101.47	596.59	36.57	387.2	46.42
Chondrodactylus_angulifer	18.12	15.61	5.61	43.66	31.48	3.51	27.97	21.22	14.29	23.31	12.19	197.18	41.18	3.1	76.8	106.71	12.05	77.86	21.54
Clonophis_kirtlandii	10.59	11.66	3.03	93.92	29.54	-8.43	37.96	18.95	-0.58	22.18	-2.13	989.61	107.37	52.49	21.2	307.48	182.14	291.85	183.96
Cnemaspis_kandiana	25.39	8.59	6.99	10.17	31.59	19.37	12.21	24.46	25.94	26.46	23.89	1940.57	330.57	51	57	892.57	202.43	376.29	674
Cnemaspis_limi	25.33	7.83	7.93	5.45	30.85	21.05	9.8	24.55	25.53	26.03	24.55	2666.25	615	98.5	67	1351.75	332.75	378.5	1351.75
Cnemaspis_podihuna	26.52	7.57	6.79	10.99	32.15	21.04	11.1	25.55	27.19	27.67	24.93	1878.07	342.85	42.12	65.77	864.74	187.87	364.35	589.64
Cnemaspis_tropidogaster	26.52	7.56	6.78	11	32.15	21.06	11.09	25.56	27.2	27.68	24.94	1873.82	342.62	41.93	65.97	863.96	187.07	363.17	589.68
Cnemidophorus_gramivagus	27.08	9.46	7.33	8.08	34.37	21.5	12.87	26.16	27.66	28.15	26.02	2347.3	356.42	30.52	59.99	997.72	155.9	237.75	978.69
Coelognathus_flavolineatus	25.53	8.65	8.46	4.31	30.83	20.49	10.34	25.33	25.36	26	24.93	2719.23	343.76	124.51	33.69	942.31	417.62	646.06	700.87
Coleodactylus_natalensis	25.75	8.8	7.4	10.53	31.5	19.7	11.8	25.45	26.2	26.9	24.2	1340.5	219	18	68.5	621	61	333.5	490.5
Coleodactylus_septentrionalis	25.7	10.09	8.31	5.04	31.82	19.74	12.08	25.4	25.6	26.19	24.97	1514.33	251.48	35.77	59.9	687.16	140.51	290.08	442.23
Coleonyx_brevis	19.16	15.23	4.69	61.64	34.48	2.25	32.23	24.86	13.49	26.56	10.81	392.85	76.24	9.76	68.31	185.59	38.07	152.47	44.16
Coleonyx_elegans	25.46	11.37	6.59	17.63	33.8	16.68	17.12	26.57	24.85	27.32	22.94	1557.15	290.96	27.97	73.98	761.2	99.4	419.42	164.47
Coleonyx_mitratus	25.73	11.03	7.35	9.48	33.56	18.65	14.91	25.39	25.72	26.96	24.52	1742.73	341.33	14.27	82.24	868.36	53.72	269.98	336.62
Coleonyx_variegatus	18.55	15.82	4.78	64.63	36.12	2.77	33.35	19.74	21.43	27.08	10.63	224.71	43.32	2.62	64.22	106.71	14.02	73.35	71.61
Colobodactylus_dalcyanus	14.7	11.2	6.2	22.68	22.3	4.4	17.9	17.2	11.6	17.2	11.5	1881	331	34	67	922	133	850	150
Coloptychon_rhombifer	25.21	10.64	7.6	7.12	32.6	18.71	13.89	24.74	25.33	26.24	24.36	3590.71	619.43	55.14	60	1536.71	211.57	652.71	1163.43
Coluber_constrictor	20.77	13.29	5.58	37.05	32.16	8.04	24.12	23.96	17.26	24.91	15.59	883.47	168.87	18.2	71.56	422.05	67.11	294.01	89.38
Compsophis_albiventris	25.4	12.6	6.5	18.87	33.8	14.5	19.3	26.8	22.9	27.1	22.4	1263	340	2	110	850	12	380	12
Compsophis_boulengeri	20.23	10.67	6.45	24.01	28.12	11.7	16.41	22.81	17.9	22.83	16.88	1780.71	334.77	41.9	73.74	927.15	155.73	907.37	187.52
Compsophis_laphystius	20.49	10.5	6.36	24.2	28.3	11.91	16.39	23.11	18.19	23.14	17.12	1859.39	339.97	45.04	71.12	943.57	170.6	925.55	213.36
Congolacerta_vauereselli	19.62	11.35	8.8	2.9	26.11	13.28	12.83	19.51	19.45	19.94	19.26	1390.81	170.88	44.13	34.17	462.69	185.33	349.5	281.12
Conophis_lineatus	25.23	10.8	6.8	14.76	33.1	17.32	15.78	25.98	24.55	26.84	23.15	1596.88	292.52	24.84	72.53	753.97	86.74	374.5	192.9
Conopsis_biserialis	17.8	15.84	6.59	21.14	29.45	5.54	23.91	19.38	16.44	20.2	14.8	843.68	194.37	6.35	98.04	513.37	26.12	295.42	40.22
Conopsis_nasus	17.47	16.68	6.23	31.04	30.39	3.71	26.68	20.07	16.08	21.02	13.14	643.75	152.26	5.31	98.05	406.34	22.56	247.86	41.91
Contia_tenuis	11.2	13.96	4.75	54.32	28.44	-0.86	29.29	5.11	18.25	18.38	4.76	1045.31	189.32	6.8	76.44	526.05	38.51	45.36	503.47
Cophosaurus_texanus	18.08	15.68	4.68	64.2	34.33	0.86	33.47	23.98	13.04	25.95	9.52	462.24	85.58	12.98	65.01	208.4	49.14	172.98	62.03
Cophotis_dumbara	23.94	8.84	7.24	9.14	30.24	18.1	12.14	23.04	24.2	24.96	22.62	2368.8	354.6	100.2	42.2	958.8	345.4	496.8	731
Cordylosaurus_subtessellatus	18.7	13.64	6.12	29.94	29.16	6.95	22.22	19.74	17.12	22.05	14.52	178.96	43.49	1.37	93.14	115.14	5.87	62.34	23.43
Cordylus_aridus	15.23	13.83	5.51	38.67	28.09	3.18	24.91	18.26	10.23	20.06	10.15	394.4	47.6	21.73	21.87	125.13	74.27	106.53	74.27
Cordylus_meculae	25.35	10.5	6.13	18.88	33.68	16.7	16.98	26.4	22.75	27.4	22.75	1239	290.5	2	108.25	808.25	7.25	280.75	7.25
Cordylus_ukingensis	16.9	11	6.3	14.57	25.1	7.9	17.2	17.4	15.5	18.5	14.7	1665	338	3	92	885	21	454	26
Coronella_girondica	13.5	10.56	3.73	59.81	29.29	1.4	27.89	10.21	20.09	21.45	6.19	622.95	81.24	18.84	38.88	221.46	78.82	85.32	194.17
Corytophanes_cristatus	25.34	9.29	7.32	10.17	31.87	19.04	12.84	25.62	25.3	26.46	23.89	2550.07	371.68	65.8	51.33	987.12	236.41	533.84	601.42
Corytophanes_percarinatus	20.28	11.31	7.35	9.58	27.86	12.56	15.31	20.73	19.3	21.37	18.92	1869.24	356.42	15.59	83.12	903.87	57.64	458.1	97.11
Crisantophis_nevermanni	25.44	10.81	7.43	7.92	33.04	18.6	14.44	25.18	25.42	26.53	24.48	1756.79	346.5	8.89	85.83	880.69	36.52	253.34	286.44
Crocodilurus_amazonicus	26.11	10.01	7.9	4.99	32.68	19.94	12.74	25.79	26.15	26.69	25.45	2416.2	333.76	75.07	45.99	932.21	267.07	417.95	673.62
Crotalus_adamanteus	19.7	12.43	4.45	57.5	32.8	4.87	27.93	23.66	17.08	26.68	11.99	1367.11	178.3	62.75	32.89	489.21	226.84	472.45	296.48
Crotalus_aquilus	18.46	15.57	6.36	25.92	30.26	5.98	24.28	20.51	15.68	21.26	14.81	756.66	161.4	12.85	83.32	400.5	46.31	258.03	50.43
Crotalus_atrox	18.14	15.61	4.61	66	34.75	0.87	33.88	23.98	13.62	26.32	9.44	477.24	86.6	13.69	63.51	211.33	51.73	173.34	68.11
Crotalus_basiliscus	24.01	14.17	6.34	27.52	34.14	11.85	22.29	26.77	23.05	27.14	20.28	922.39	241.65	2.71	112.3	648.82	14.3	472.61	52.3
Crotalus_catalinensis	23.8	14.35	5.4	47.71	36.5	10.2	26.3	30.1	24.3	30.1	17.9	169.5	42	1	85.5	97.5	6	97.5	41
Crotalus_cerastes	18.85	15.79	4.43	72.13	37.56	2.09	35.47	19.3	22.38	28.28	9.97	198.28	34.83	2.59	56.86	86.3	13.83	55.4	67.44
Crotalus_durissus	23.19	11.53	6.67	19.15	31.89	14.1	17.79	24.42	21.41	25.37	20.56	1426.19	232.41	30.31	61.15	626.81	112.71	363.61	245.16
Crotalus_enyo	20.61	15.47	5.85	40.82	34.25	8.02	26.22	21.63	20.86	26.31	15.77	156.22	36.71	0.15	82.76	88.13	2.19	74.42	47.57
Crotalus_horridus	14.19	12.67	3.56	81.41	31.56	-3.88	35.44	17.67	10.19	24.28	3.23	1175.65	132.94	64.05	21.97	363.24	218.67	312.92	261.58
Crotalus_intermedius	17.22	14.15	6.8	16.3	27.4	6.78	20.63	18.07	15.63	19.15	14.95	1059.45	215.47	14.89	85.17	558.37	52.45	313.08	69.3
Crotalus_lepidus	17.28	16.6	5.26	54.2	32.64	0.96	31.69	22.67	14.2	23.82	10.03	443.1	99.24	6.75	82.17	254	28.09	207.6	48.73
Crotalus_mitchellii	17.91	15.49	4.64	66.3	35.92	2.21	33.72	17.11	20.79	26.73	9.85	198.44	34.92	2.41	58.37	88.54	13.47	49.72	72.43
Crotalus_molossus	16.92	16.63	5.29	54.05	32.65	0.87	31.78	22.46	15.16	23.59	9.84	471.11	102.58	7.35	78.57	262.31	30.15	202.14	58.66
Crotalus_oreganus	8.94	15.3	4.17	73.8	29.54	-7.15	36.69	6.08	13.98	18.65	-0.23	460.47	69.01	12.54	40.51	189.71	49.08	67.16	169.79
Crotalus_polystictus	17.04	16.04	6.5	22.57	28.96	4.42	24.55	18.77	16.05	19.61	13.83	827.86	192.61	6.4	99.95	514.22	25.76	274.28	37.43
Crotalus_pricei	16.35	16.2	5.56	45.07	30.61	1.53	29.09	20.93	15.24	21.75	10.35	700.25	168.14	8.84	89.49	414.76	38.83	345.86	91.36
Crotalus_pusillus	19.29	14.38	6.49	17.76	30.06	8.1	21.96	20.24	18.87	21.39	16.77	1099	243.44	4.44	103.33	693.44	17.22	369.89	36
Crotalus_ravus	15.04	14.92	6.97	16.3	25.36	4.09	21.27	16.09	13.05	16.9	12.74	896.52	179.59	10.62	85.02	479.95	37.82	266.06	49.85
Crotalus_ruber	19.04	15.44	5.63	44.29	33.52	6.2	27.32	18	20.35	25.21	13.83	204.49	42.22	0.52	78.29	108.4	5.89	60.01	79.73
Crotalus_scutulatus	17.47	16.53	5.12	57.82	33.92	1.28	32.65	21.19	16.96	24.67	9.99	354.96	73.74	5.38	72.84	188.65	23.55	144.43	51.73
Crotalus_tancitarensis	17.28	14.48	6.6	16.59	28.08	6.33	21.75	18.03	16.98	19.25	14.9	1212.5	283.5	3.75	105.75	779.25	16.75	324	32.75
Crotalus_tigris	21.22	16.54	5.04	61.29	37.44	4.83	32.61	28.16	22.64	28.95	13.48	361.65	91.1	3.32	86.84	210.81	16.96	188.56	75.33
Crotalus_transversus	12.12	15.08	6.98	15.53	22.32	0.84	21.48	13.2	9.96	13.92	9.96	1174	242.4	9.8	94.6	693.2	39	333	40.2
Crotalus_triseriatus	15.69	15.07	6.7	18.68	26.49	4.17	22.32	17.03	14.06	17.77	13.02	960.05	201.99	10.64	89.18	546.99	38.68	318.23	53.6
Crotalus_viridis	9.35	15.74	3.82	88.35	30.5	-10.58	41.07	17.78	0.65	20.69	-2.07	405.56	69.15	12.39	55.64	179.12	43.61	156.72	48.44
Crotalus_willardi	15.25	17.13	5.39	52.3	31.2	-0.58	31.79	20.98	15.08	21.71	8.46	616.6	155.04	7.56	91.25	376.44	35.85	327.07	93.23
Crotaphopeltis_tornieri	20.23	10.24	6.35	16.26	27.99	12.01	15.98	21.16	18.17	21.94	17.82	1277.56	277.11	8.77	89.49	699.94	33.97	370.4	39.19
Crotaphytus_antiquus	21.23	16.67	5.27	52.29	35.87	4.7	31.17	26.13	19	27.03	14.03	189.33	32	2	62.67	91	11.67	85	25.67
Crotaphytus_bicinctores	11.95	16.05	4.1	78.98	33.34	-5.39	38.73	9.52	16.06	22.42	2.24	241.8	31.94	8.57	34.4	85.59	34.36	48.69	75.05
Crotaphytus_collaris	15	15.62	4.24	75.72	33.3	-3.56	36.86	21.91	8.8	24.53	5.05	534.2	85.13	17.26	54.85	217.66	63.89	184.35	74.6
Crotaphytus_grismeri	21.55	18.05	4.98	66.18	40.4	4.48	35.93	13.4	25.45	30.25	13.4	102.5	15.5	0	57.5	43.75	4	25.5	43.75
Crotaphytus_insularis	20.42	16.68	5.62	48.01	35.5	6.22	29.28	14.82	21.2	26.92	14.46	108.6	19	0	63	44	2	38.6	43.6
Crotaphytus_nebrius	21.64	16.28	4.9	62.78	38.15	5.2	32.95	28.88	23.15	29.56	13.72	316.65	81.12	2.7	82.89	185.49	13.89	165.88	66.3
Crotaphytus_reticulatus	22.33	13.37	4.27	62.24	37.07	6.09	30.99	26.94	15.31	29.67	13.72	546.98	100.37	17.47	54.32	216.83	66.76	163.8	71
Crotaphytus_vestigium	17.87	16.05	5.45	49.52	33.66	4.32	29.34	15.78	19.42	24.73	12.06	211.62	38.79	0.57	69.92	102.19	8.55	53.42	88.74
Cryophis_hallbergi	17.85	12.15	6.55	16.14	27.05	8.7	18.35	18.5	16.6	19.85	15.65	2411.5	475	38	80	1285	133.5	544.5	217.5
Cryptoblepharus_novocaledonicus	22.63	7.23	5.4	21.79	28.9	15.66	13.24	25.32	20.73	25.32	19.73	1650.7	242.1	67.6	42.8	683.4	219.3	683.4	253.7
Ctenoblepharys_adspersa	19.03	10.32	5.8	25.5	28.29	10.74	17.56	20.1	20.67	22.51	16.02	8.1	1.84	0	45.87	4.48	0.48	2.68	3.13
Ctenophorus_maculosus	20.53	14.71	4.6	61.27	36.49	4.86	31.63	27.64	13.06	28.19	12.48	170.34	25.08	9.39	33.18	63.34	30.65	61.46	30.96
Ctenophorus_nuchalis	22.73	14.78	4.81	55.88	37.46	6.98	30.48	27.04	18.72	29.33	15.13	281.95	57.13	6.01	61.39	143.68	23.8	118.91	41.6
Ctenophorus_ornatus	18.03	13.99	4.76	54.75	34.18	5.05	29.13	12.22	21.41	25.07	11.17	323.74	55.28	11.68	49.73	143.61	40.71	47.91	137.46
Ctenophorus_tjantjalka	21.07	15.07	4.7	60.09	37.03	5.3	31.73	27.98	14.6	28.42	13.07	179.91	29.51	7.76	38.62	70.38	27.49	66.82	29.89
Ctenosaura_bakeri	26.2	8.5	7	13.53	32	19.9	12.1	25.2	27.3	27.5	24.2	2603	432	73	57	1241	280	318	878
Ctenosaura_melanosterna	24.77	11.7	6.97	14.92	33.3	16.67	16.63	24.93	24.7	26.47	22.57	1336.33	186.67	34.33	46	496.67	127.33	313.33	225
Ctenosaura_oedirhina	26.6	7.4	6.9	12.13	31.7	21	10.7	25.8	27	27.7	24.7	2275	433	62	67	1190	191	387	676
Ctenosaura_palearis	24.94	10.76	6.76	12.83	33.24	17.44	15.8	25.32	24.2	26.52	23.16	997.6	202.8	8.2	89.2	498	28	170	52.6
Ctenosaura_similis	24.54	10.26	7.05	12.27	31.91	17.3	14.61	25.01	24.22	25.88	22.8	2121	342	44.42	62.92	898.13	158.81	466.88	382.98
Ctenotus_gagudju	27.26	11.82	6.01	19.75	36.3	16.78	19.52	28.11	24.25	29.48	24.25	1416.6	325	1.38	108	935.93	6.24	377.67	6.24
Ctenotus_inornatus	26.71	13.33	5.48	35.31	37.3	13.06	24.25	29.41	21.84	30.43	21.51	774.94	199.18	1.1	110.05	523.73	9.09	295.72	10.25
Ctenotus_leonhardii	22.44	14.99	4.68	59.92	37.73	5.99	31.74	28.24	17.73	29.55	14.3	237.1	42.68	6.25	53.67	107.86	24.88	102	35.16
Cyclophiops_major	17.29	8.34	3.17	64.91	30.11	3.36	26.75	23.06	9.57	25.1	8.46	1401.25	251.17	28.29	66.06	674.07	103.4	608.69	118.37
Cyclura_collei	26.18	7.43	6.98	9.98	31.35	20.75	10.6	27.08	24.8	27.28	24.8	1067.25	232	27.5	64.25	499.75	97.5	325.5	97.5
Cylindrophis_ruffus	24.97	9.08	6.99	14.2	31.8	17.48	14.32	25.57	23.55	26.52	22.93	2264.38	339.63	75.17	53.67	920.18	257.75	590.82	427.62
Cyrtodactylus_agusanensis	25.08	9.07	8.3	4.92	30.72	19.86	10.86	24.79	25.12	25.61	24.4	2669.71	352.53	124.49	33.22	961.36	409.05	590.78	733.55
Cyrtodactylus_annulatus	25.28	8.95	8.23	4.87	30.92	20.12	10.8	25.05	25.25	25.85	24.65	2443.71	324.69	100.76	36.94	888.52	335.8	535.6	632.02
Cyrtodactylus_ayeyarwadyensis	25.83	10.26	4.92	20.58	35.71	15.01	20.7	26.2	24.17	28.2	22.78	2328.04	540.7	1.14	104.56	1511.96	8.92	379.9	13.14
Cyrtodactylus_louisiadensis	24.39	7.47	8.2	5.2	28.96	19.93	9.03	24.86	23.68	24.93	23.63	2632.69	366.19	128.06	36.19	1015.19	432.94	902.38	446.69
Cyrtodactylus_philippinicus	25.47	8.14	6.83	10.64	31.57	19.62	11.95	25.3	24.77	26.72	23.95	2629.57	465.96	55.3	62.95	1216.56	201.73	586.24	394.36
Cyrtopodion_agamuroides	21.43	14.14	4.15	70.07	37.9	4.25	33.65	13.73	27.47	30.07	12.02	120.48	29.57	0.48	95.37	73	3.47	8.85	69.41
Cyrtopodion_gastrophole	23.69	11.04	3.31	78.51	40.67	7.7	32.97	15.44	30.76	33.69	13.5	244.86	70.57	0	115.29	167.43	0.71	1	127.86
Cyrtopodion_scabrum	20.61	14.4	3.94	78.3	38.79	2.59	36.19	14.61	26.77	30.18	10.13	221.7	52	1.39	90.64	127.35	8.28	42.75	80.1
Cyrtopodion_sistanense	20.7	15	4.2	74.28	38.4	2.7	35.7	10.9	30.1	30.1	10.9	120	29	0	93	76	4	4	76
Daboia_deserti	18.53	12.7	3.82	70.42	36.57	3.62	32.95	16.75	27.48	27.75	9.66	177.91	26.05	2.51	47.02	68.01	16.46	18.84	56.85
Daboia_mauritanica	16.09	13.01	4.08	62.8	33.63	2	31.64	11.36	23.93	24.47	8.37	351.96	51.49	4.05	52.33	139.37	22.68	25.88	127.95
Daboia_palaestinae	17.62	10.66	4.08	56.91	31.08	5.24	25.84	10.21	24.28	24.44	10.17	628.21	148.57	0.23	102.79	391.14	1.38	3.36	383.01
Dalmatolacerta_oxycephala	11.34	8.5	3.13	64.3	26.02	-0.69	26.71	7.05	19.5	19.62	3.22	1190.68	154.95	54.3	30.17	423.8	189.11	191.66	364.72
Darevskia_alpina	4.24	10.06	3.46	65.07	19.59	-9.05	28.64	10.36	-3.75	12.37	-4.12	1000.45	132.5	49.64	29	351.32	166.55	328.77	182.82
Darevskia_armeniaca	3.81	11.44	3.34	77.02	21.38	-12.43	33.81	8.19	-5.15	13.24	-6.34	619.81	100.01	24.86	44.33	255.62	83.22	177.19	85.87
Darevskia_bendimahiensis	5.03	11.74	3.11	86.73	24.89	-12.38	37.28	6.84	14.56	15.89	-6.3	455.56	69.81	16.94	41.5	177.25	58.44	62.12	94.44
Darevskia_brauneri	8.53	9.51	3.25	68.99	23.81	-5.02	28.83	11.29	2.39	17.27	-0.28	1026.52	122.26	58.78	21.93	329.33	193.24	297.12	228.75
Darevskia_caucasica	2.98	10.33	3.32	71.18	19.08	-11.69	30.77	9.04	-6.24	11.79	-6.29	819.85	123.67	25.95	47.74	337.21	91.38	302.36	91.91
Darevskia_chlorogaster	13.92	11.02	3.43	73.88	30.69	-0.89	31.58	10.69	22.31	23.22	4.63	639.23	99.28	17.81	49.61	260.16	60.48	70.54	182.04
Darevskia_clarkorum	10.28	9.65	3.4	65.43	24.95	-3	27.95	7.5	7.8	18.43	1.8	1205.25	139.25	73	21.5	396.5	228.75	277.25	336.25
Darevskia_daghestanica	3.13	9.71	3.06	74.72	19.45	-11.82	31.27	10.14	-6.59	12.43	-6.59	713.12	115.71	18.63	53.53	311.41	64.96	275.55	64.96
Darevskia_derjugini	8.48	10.11	3.39	68.58	23.89	-5.51	29.4	10.59	2.55	17.04	-0.42	1103.5	126.46	65.53	19.3	340.69	214.73	298.89	259.73
Darevskia_mixta	5.37	11.34	3.52	71.06	22.02	-9.76	31.78	6.49	-1.94	14.09	-4.02	937.38	108.08	55.69	19.08	284.23	185.54	240.77	221
Darevskia_parvula	6.07	11.34	3.29	77.79	23.97	-10.08	34.05	8.62	5.03	15.61	-4.22	721.99	95.06	37.82	30.54	253.57	125.73	154.93	160.09
Darevskia_portschinskii	10.44	10.77	3.22	78.72	27.75	-5.21	32.96	15.03	0.17	20.32	0.17	569.92	91.08	21.6	43.56	232.4	74.04	181.92	74.04
Darevskia_praticola	10.04	9.72	3.02	78.67	26.78	-4.91	31.69	15.25	3.88	19.93	-0.21	697.02	93.67	36.43	30.11	246.89	119.52	209.41	143.79
Darevskia_raddei	8	11.87	3.14	86.35	28.02	-9.14	37.16	6.85	15.37	18.76	-3.29	445.07	70.47	12.03	49.33	182.6	43.28	59.38	109.72
Darevskia_rostombekovi	8.33	10.62	3.26	75.65	25.35	-6.81	32.16	11.72	-1.54	17.79	-1.54	572.94	96.5	18.38	49.06	247.38	64.94	188.12	64.94
Darevskia_rudis	8.31	10.2	3.39	68.62	23.98	-5.68	29.67	8.79	9.49	16.82	-0.66	767.49	99.31	36.33	30.91	267.89	120.67	179.38	186.65
Darevskia_sapphirina	4.55	11.75	3	88.17	24.9	-13.05	37.95	2.65	15.6	15.6	-6.85	552	76	16	41.5	207.5	54.5	54.5	132
Darevskia_saxicola	4.86	10.51	3.48	68.15	20.69	-9.07	29.75	11.42	-3.57	13.4	-3.95	869	130.65	32.04	44.08	351.38	110.62	336.31	115.08
Darevskia_uzzelli	5.2	12.4	3.04	92.98	26.1	-14.12	40.22	9.56	16.44	16.44	-7.32	516.2	76.4	20.8	36	197.6	79	86.4	104.6
Darevskia_valentini	6.91	11.79	3.28	81.26	25.92	-9.6	35.52	6.98	14.21	16.93	-3.84	535.51	77.34	14.37	44.53	205.62	52.22	68.35	139.76
Dasia_olivacea	25.67	8.6	8.17	5.21	31.13	20.41	10.72	25.49	25.38	26.26	24.94	2599.12	340.42	109.63	38.92	932.31	370.17	608.33	625.33
Dasypeltis_fasciata	25.23	11.06	7.23	10.1	33.27	17.75	15.52	24.58	25.04	26.56	24	1663.03	286.12	21.36	64.91	742.12	93.41	323.35	483.45
Dasypeltis_scabra	22.58	13.66	6.33	25.16	32.98	10.95	22.02	24.14	19.89	25.38	19.05	664.28	140.75	4.42	93.53	364.4	20.01	203.29	53.39
Delma_fraseri	17.55	13.58	4.89	49.55	32.59	5.02	27.58	12.89	19.81	23.83	11.16	299.88	42.25	14.62	32.75	112.19	48.65	56.25	105.1
Delma_labialis	23.53	10.55	5.3	32.12	31.94	12.23	19.71	26.76	20.31	27.05	18.91	1002.48	226.7	10.45	91.72	612.85	42.85	563.17	59
Delma_torquata	18.8	12.87	5.18	42.61	29.98	5.31	24.67	23.63	13.92	23.79	12.9	945.09	133.55	33.27	41	371.82	122.82	370.09	141.55
Dendrelaphis_bifrenalis	26.55	9.51	5.75	19.76	35.27	18.53	16.74	25.89	25.84	29.16	24	1286.43	325.51	9.9	86.93	743.26	46.25	198.85	353.36
Dendroaspis_polylepis	22.32	13.4	6.18	25.78	32.3	10.38	21.92	24.2	19.13	25.05	18.63	794.22	177.76	5.26	92.97	461.13	21.98	257.82	70.06
Diadophis_punctatus	12.62	13.46	3.8	79.52	30.52	-5.39	35.91	17.57	7.54	22.54	2.06	905.91	117.37	42.18	38.7	318.98	144.65	259.84	193.86
Dibamus_bourreti	19.25	7.93	3.14	62.87	31.38	5.92	25.45	24.61	11.67	26.64	10.62	1501.19	268.58	32.37	65.53	736.64	119.1	670.94	129.66
Dibamus_novaeguineae	24.2	8.58	8.22	5.52	29.61	19.23	10.38	24.34	23.87	24.73	23.39	2790.67	330.14	145.5	28.06	917.44	480.42	725.35	595.89
Dierogekko_inexpectatus	23.5	7.2	5.6	20.33	29.6	16.85	12.75	26	21.55	26	20.85	1255	213.5	40.5	55.5	582	137.5	582	160
Dierogekko_insularis	23.8	7	5.7	18.65	29.6	17.5	12.1	26.1	21.9	26.1	21.3	1437	233	51	53	652	165	652	187
Dierogekko_kaalaensis	22.3	7.2	5.4	21.32	28.6	15.5	13.1	25	20.2	25	19.5	1207	201	39	54	558	141	558	164
Dierogekko_koniambo	22.78	7.1	5.45	21.25	28.9	15.95	12.95	25.4	20.65	25.4	19.95	1373.5	214.5	55	48.75	613.5	175.75	613.5	197
Dierogekko_nehoueensis	23.2	7.3	5.57	21.09	29.4	16.37	13.03	25.8	21.1	25.8	20.43	1102.67	185	35.33	54.67	514	124	514	146.33
Dierogekko_poumensis	23.5	7.2	5.6	20.33	29.6	16.85	12.75	26	21.55	26	20.85	1255	213.5	40.5	55.5	582	137.5	582	160
Dierogekko_thomaswhitei	22.1	7.2	5.4	21.37	28.4	15.3	13.1	24.8	20	24.8	19.3	1357	218	48	52	620	165	620	188
Dierogekko_validiclavis	20.65	7.15	5.4	21.56	27.05	13.95	13.1	23.35	18.5	23.35	17.8	1739.5	272.5	60.5	52.5	799	208	799	235
Dinarolacerta_mosorensis	9.93	8.35	3.13	63.41	24.37	-1.92	26.29	6.13	17.98	18.06	1.9	1219.13	153.49	59.72	26.91	417.55	204.39	206.04	365.93
Diplodactylus_granariensis	18.6	14.34	4.99	49.13	33.12	4.61	28.51	18.35	15.87	24.61	12	201.13	23.22	11.41	21.72	60.97	38.75	52.77	50.94
Diplodactylus_ornatus	23.11	13.72	4.88	50.44	37.56	9.74	27.83	19.71	24.18	29.55	16.57	231.34	47.79	1.58	76.07	117.76	9.88	71.27	94.97
Diploglossus_bilobatus	23.84	9.52	7.85	6.73	30.13	18.09	12.05	23.53	24.05	24.75	22.98	3179.83	431.35	102.54	41.25	1143	369.19	622.35	840.54
Diplolaemus_darwinii	7.67	9.08	4.76	37.24	18.03	-0.88	18.91	6.46	7.5	12.22	2.77	393.96	44.32	24.36	21.39	121.88	79.3	99.94	98.61
Diplometopon_zarudnyi	24.37	13.86	4.15	71.72	40.72	7.69	33.03	19.17	32.37	32.87	14.65	117.76	29.76	0.02	99.01	66.33	0.57	1.02	44.46
Diporiphora_albilabris	26.9	12.3	5.7	27.48	36.08	14.66	21.42	28.83	24.09	29.76	22.77	996.76	246.61	1.04	112.37	669.65	6.67	357.96	9.61
Diporiphora_lalliae	25.08	15.04	5.08	50.04	38.26	8.89	29.37	29.93	19.45	30.56	18	398.04	95.85	3.71	88.92	241.28	16.8	194.55	19.46
Diporiphora_linga	18.31	14.96	5.42	43.58	32.44	5.07	27.37	15.05	21.7	23.53	12.41	204.3	23.62	9.96	22.06	65.21	39.03	45.26	55.41
Dipsas_catesbyi	25.85	10.69	7.82	5.31	32.81	19.02	13.79	25.66	25.69	26.45	25.13	2195.69	318.23	61.54	52.56	886.67	217.26	402.92	530.21
Dipsas_pratti	21.01	9.75	8.67	3.47	26.71	15.5	11.22	20.78	20.92	21.36	20.49	2166.21	301.23	69.77	41.04	761.96	267.53	505.5	631.91
Dipsosaurus_dorsalis	19.84	15.85	4.8	64.75	37.17	3.88	33.29	21.87	22.24	28.33	11.86	198.61	40.69	2.05	65.88	97.08	11.27	78.72	56.66
Ditypophis_vivax	25.48	7.77	5.53	19.27	33.06	19.08	13.98	23.44	27.83	27.83	23.16	95.1	21	2.1	61.4	43.3	9.8	9.8	26.1
Dixonius_vietnamensis	24.76	9.49	6.01	14.18	32.54	16.82	15.72	24.91	23.26	26.46	22.75	1982.61	372.87	5.79	80.94	1039.47	38.3	411.86	102.96
Dolichophis_jugularis	14	12.74	3.54	82.06	33.48	-2.26	35.74	6.57	24.06	24.35	3.38	498.06	92.23	3.03	75.68	247	12.26	16.17	225.23
Dolichophis_schmidti	11.56	12.37	3.32	84.97	31.42	-5.26	36.67	7.32	20.78	22.26	0.48	434.36	68.96	6.84	58.08	183.41	26.56	37.64	146.99
Draco_bimaculatus	24.09	8.99	8.27	5.07	29.65	18.86	10.79	23.73	24.16	24.61	23.37	2843.02	369.52	140.59	30.92	1008.02	464.3	627.54	845.02
Draco_cornutus	25.55	7.89	8.89	2.85	30.16	21.33	8.84	25.39	25.56	25.82	25.14	3015.12	339.36	165.09	22.2	939.57	544.12	710.08	818.22
Draco_cyanopterus	24.63	9.37	8.35	4.59	30.43	19.28	11.15	24.36	24.66	25.14	24	2604.17	340.45	127.54	31.45	925.22	412.66	588.65	738.52
Draco_dussumieri	25.34	9.15	5.94	15.86	33.39	17.95	15.44	24.66	24.96	27.6	23.5	1930.57	582.01	7.39	97	1261.32	35.5	241.76	627.45
Draco_guentheri	26.03	9.26	8.66	3.4	31.63	21.01	10.63	26	25.88	26.46	25.62	2560.13	321.42	90.45	38.36	895	307.42	602.94	422.19
Draco_haematopogon	25.6	9.18	7.82	7.94	31.77	19.2	12.56	25.63	24.83	26.46	24.45	2421.99	323.68	100.48	43.71	875.59	338	593.04	560.57
Draco_lineatus	24.54	6.43	7.48	7.14	29.22	20.68	8.54	24.16	24.43	25.26	23.5	2141.86	303.29	86.22	36.43	804.9	323.43	486.45	601.29
Draco_maculatus	23.22	9.96	5.02	29.64	32.08	11.96	20.12	25.43	19.59	26.41	18.91	1802.99	372.74	10.95	83.95	995.31	50.3	654.4	79.78
Draco_mindanensis	24.09	8.99	8.27	5.07	29.65	18.86	10.79	23.73	24.16	24.61	23.37	2843.02	369.52	140.59	30.92	1008.02	464.3	627.54	845.02
Draco_ornatus	24.43	9.03	8.29	4.98	30.03	19.21	10.82	24.1	24.51	24.96	23.74	2795.03	367.67	133.23	32.42	1002.79	438.42	609.47	805.3
Draco_quadrasi	25.28	7.26	7.25	7.24	30.67	20.71	9.96	25.11	24.74	26.26	24.35	2544.89	456.93	24.68	69.04	1214.21	108.04	532.75	221.46
Draco_reticulatus	26.23	7.8	7.84	7.34	31.23	21.33	9.91	25.68	26.43	26.91	25.14	2783.61	385.53	127.52	34.53	1048.92	444.29	554.02	871.21
Draco_taeniopterus	26.32	10.1	5.89	15.42	34.64	17.26	17.38	26.4	24.55	28.14	24.12	1793.14	353.07	11.85	77.92	917.41	56.6	360.11	142.77
Dromicodryas_bernieri	23.6	13.05	6.63	21.15	32.39	12.8	19.59	25.51	20.63	25.68	20.45	1213.87	315.68	5.9	107.47	794.17	22.36	594.73	24.44
Dromicodryas_quadrilineatus	23.29	11.99	6.64	19.66	31.5	13.55	17.95	25.06	20.75	25.23	20.39	1532.13	360.23	16.75	99.01	925.75	63.88	718.26	77.66
Drymobius_rhombifer	26.04	9.83	7.95	5.4	32.44	20.06	12.39	25.75	26.06	26.66	25.31	2310.28	329.25	70.7	47.98	908.87	251.81	410.55	625.94
Drysdalia_mastersii	16.47	12.7	5.34	38.64	29.12	5.53	23.6	12.27	21.14	21.28	11.41	367.18	49.56	14.24	35.95	137.08	50.8	53.15	132.82
Duberria_lutrix	18.54	13.48	6.74	20.65	28.34	8.03	20.32	19.72	16.52	20.95	15.74	939.94	180.22	14.05	71.97	467.28	56.17	264.92	195.07
Duberria_variegata	22.64	11.66	6.02	25.6	31.32	12.1	19.22	25.56	19.42	25.57	18.99	798.09	136.15	21.67	56.91	356.15	74.29	354.27	81.43
Ebenavia_inunguis	22.18	9.36	6.12	22.86	29.33	14.15	15.18	24.71	20.32	24.76	19.02	2167.08	363.62	61.27	59.6	1010.64	235.11	978.76	317.82
Echinanthera_undulata	19.03	10.89	5.87	24.98	27.5	9.15	18.34	21.91	15.81	21.98	15.66	1491.41	230.16	48.08	50.26	632.34	168.16	599.12	178.42
Echiopsis_curta	16.78	12.84	5.05	44.18	30.9	5.63	25.27	12.42	21.34	22.47	11.22	440.55	68.88	15.17	43.77	187.2	52.73	56.28	182.71
Echis_jogeri	27.75	13.78	5.85	23.21	39.18	15.79	23.39	26.54	26.68	31.13	25.28	912.39	276.53	0	125.89	681.02	0.09	80.86	18.73
Echis_leucogaster	27.86	14.61	5.52	34.3	40.25	13.87	26.38	28.63	25.27	31.99	23.09	347.45	120.81	0.05	139.96	276.37	0.6	59.07	3.38
Echis_omanensis	25.79	11.24	4.37	51	38.06	12.72	25.35	20.58	31.08	31.75	18.88	107.02	36.15	0.17	114.94	72.74	2.83	3.58	60.62
Echis_pyramidum	26.16	13.56	6.93	17.86	36.32	16.58	19.74	26.82	25	28.32	23.81	447.5	108.03	2.84	102.06	242.59	15.2	99.25	119.89
Egernia_kingii	16.93	12.74	5.02	44.75	31.23	5.97	25.26	12.09	21.37	22.74	11.4	491.21	84.7	13.58	54.89	227.4	48.7	53.41	223.7
Eirenis_aurolineatus	15.58	10.63	3.54	68.64	31.13	1.61	29.52	7.06	24.19	24.22	6.67	682.91	125.73	6.5	66.5	324.5	28.68	34.41	324.09
Eirenis_barani	15.11	11.46	3.57	73.69	32	0.25	31.76	6.33	24.19	24.26	5.46	715.68	128.03	5.25	69.32	347.67	25.5	30.3	345.91
Eirenis_collaris	15.08	13.35	3.46	86.07	35.08	-2.76	37.84	9.19	23.57	25.93	3.82	316.45	56.77	4.62	70.84	146.8	17.64	25.42	115.16
Eirenis_coronelloides	18.72	14.07	3.8	82.82	38.77	2.05	36.72	8.43	29.08	29.15	8.02	282.39	54.39	0.04	84.5	146.95	0.6	0.94	144.69
Eirenis_decemlineatus	16.33	11.71	3.77	70.54	32.91	1.86	31.05	7.97	24.95	25.06	7.14	555.69	107.67	2.43	83.96	290.51	11.65	13.58	285.9
Eirenis_eiselti	14.91	12.17	3.34	84.77	34.64	-1.34	35.99	4.9	25.52	25.65	3.99	597.48	99.59	3.16	69.6	274.25	15.16	19.61	273.02
Eirenis_levantinus	16.24	10.66	3.64	67.07	31.46	2.54	28.92	7.5	24.47	24.56	7.5	800.37	158.45	4.22	78.54	423.08	20.85	24.27	421.05
Eirenis_lineomaculatus	16.63	11.64	3.85	67.94	32.57	2.55	30.03	7.8	24.87	24.97	7.74	573.69	119.25	1.63	88.89	321.27	8.91	10.92	318.93
Eirenis_medus	13.53	13.5	3.5	86.47	33.72	-4.29	38.01	8.79	23.91	24.42	2.25	303.83	55.12	4.27	67.73	140.8	16.35	20.45	104.15
Eirenis_modestus	10.55	11.47	3.41	76.61	28.61	-4.7	33.31	7.14	17.73	20.17	0.57	548.31	85.87	12.06	50.67	226.28	45.52	64.15	191.7
Eirenis_punctatolineatus	12.42	13.94	3.5	87.82	33.4	-5.77	39.17	5.42	23.09	23.51	0.94	364.46	64.69	3.07	74.94	168.43	12.37	15.17	143.11
Eirenis_rothii	16.53	12.22	3.97	67.94	32.84	2.23	30.61	7.68	24.74	24.83	7.6	450.45	95.88	0.63	91.3	258.94	3.78	5.48	256.8
Eirenis_thospitis	7.79	11.05	2.98	87.9	27.63	-8.91	36.54	5.49	18.9	18.92	-3.48	512.29	74.71	6.79	51.89	195.96	27.36	32.96	144.93
Elaphe_bimaculata	12.3	9.86	2.77	89.87	29.12	-5.87	34.99	22.35	0.77	23.46	0.21	893.7	183.87	15.98	80.16	456.34	58.57	434.4	62.08
Elaphe_quatuorlineata	12.94	9.1	3.3	63.15	27.96	0.9	27.06	8.97	20.25	21.12	5.08	814.56	111.92	30.03	37.42	304.89	107.91	114.8	261.94
Elapsoidea_nigra	20.33	10.22	6.51	17.3	28.47	12.89	15.58	21.04	18.36	22.32	17.95	1076.2	220.1	24.4	68.1	512.7	88.1	277.6	108.2
Elasmodactylus_tetensis	24.04	12.8	5.85	25.31	34.32	12.32	21.99	25.58	20.78	26.76	20.37	790.25	198.02	0.53	117.43	562.36	2.45	260.12	3.7
Elasmodactylus_tuberculosus	22.12	11.87	6.84	12.44	30.47	13.21	17.26	22.57	20.46	23.56	20.37	869.6	173.6	1	92.3	456.66	5.08	203.79	17.32
Elgaria_coerulea	6.49	11.6	3.85	63.61	23.82	-6.26	30.09	0.54	11.92	14.81	-1.31	1092.37	169.16	27.45	48.47	478.48	104.78	120.94	445.4
Elgaria_kingii	16.68	16.77	5.41	51.22	32.42	1.17	31.25	22.06	17.42	23.06	10.08	679.44	164.79	7.32	86.12	409.75	33.83	328.28	98.61
Elgaria_multicarinata	12.61	14.12	4.76	55.25	29.72	0.04	29.69	6.44	19.22	19.94	6.01	764.73	138.15	5.14	74.38	383.73	30.09	38.61	366.14
Elgaria_panamintina	17.25	15.88	3.98	83.21	38.26	-1.2	39.46	8.71	22.14	28.15	6.87	119.21	18.15	3	44.77	48.1	14.51	22.92	47.33
Elgaria_paucicarinata	21.37	13.76	5.73	39.51	32.41	8.65	23.76	26.02	21.14	26.39	16.38	381.2	120.13	0.53	122.33	275.47	4	274.07	41.53
Emoia_concolor	24.18	6.26	6.35	12.34	29.4	19.6	9.8	25.62	22.56	25.67	22.51	2564.68	359.05	103.02	41.14	1000.36	342.04	996.18	347.07
Emoia_cyanogaster	24.72	7.09	8.15	5.38	29.24	20.53	8.71	24.86	24.52	25.26	23.93	3272.12	407.29	185.07	26.37	1118.78	613.02	905.1	828.1
Emoia_isolata	26.25	7.3	8.2	5.39	30.5	21.65	8.85	26.75	25.45	26.75	25.45	2599.5	333	143	31	956.5	475.5	906	481.5
Emoia_loyaltiensis	22.66	7.43	5.38	22.24	29.11	15.4	13.71	25.44	20.98	25.44	19.73	1825.12	251.88	75.62	37.38	709.12	256.62	709.12	301.12
Emoia_pseudocyanura	25.1	7.04	8.39	4.33	29.38	21.05	8.34	25.25	24.98	25.53	24.45	3303.67	394.97	201.54	22.16	1081.28	669.18	926.99	787.94
Emoia_schmidti	26.2	6.85	8.64	3.97	30.33	22.41	7.91	26.5	26.1	26.59	25.59	3485.5	417.12	221	22.5	1171.5	690.38	954.38	803.5
Emydocephalus_annulatus	25.94	8.48	6.24	17.8	32.36	18.46	13.91	27.25	24.32	27.89	23.35	1640.45	300.6	34.02	75.28	817.74	123.19	506.34	214.65
Enhydris_enhydris	25.75	9.48	6.07	19.1	33.72	16.81	16.9	26.43	23.49	27.82	22.96	1999.85	366.13	35.37	74.56	987.11	128.62	471.34	271.16
Enhydris_innominata	27.15	7.77	6.39	9.49	33.24	21.09	12.16	27.15	26.26	28.31	25.8	1793.21	303.94	4.24	74.45	836.1	30.52	416.34	73.01
Enhydris_jagorii	27.23	10.18	5.67	17.21	35.56	17.69	17.87	27.51	24.95	29.15	24.67	1346.25	280.9	6.03	78.54	678.16	33.69	320.97	56.59
Enhydris_longicauda	27.39	9.1	5.67	15.96	34.82	18.94	15.88	27.3	25.45	29.22	25.01	1259.38	236.5	2.04	73.92	614.96	27.62	241.29	107.46
Enyalioides_heterolepis	25.6	8.24	8.69	3.19	30.55	21.09	9.46	25.43	25.63	26	25.17	5377.83	623.99	272.14	27.43	1719.81	909.04	1212.61	1442.62
Enyalioides_microlepis	25.68	9.49	8.38	5.22	31.4	20.13	11.26	25.38	25.85	26.19	24.88	2805.62	305.81	152.19	20.43	868.76	509.58	598.89	771.66
Enyalioides_praestabilis	24.37	9.76	8.49	4.72	30.31	18.87	11.44	24.13	24.41	24.9	23.68	2951.51	314.33	180.58	16.74	893.38	583.68	702.64	783.08
Ephalophis_greyae	24.33	12.32	5.15	40.68	35.63	11.95	23.69	23.93	24.57	29.25	18.85	303.36	76.24	0.9	91.97	185.66	6.81	127.36	82.64
Eremias_montanus	11.22	15.2	3.76	86.16	33.64	-6.28	39.92	5.4	22.12	22.36	0.1	468.2	84.4	0.2	81.2	227.2	0.8	2.6	190.4
Eremias_pleskei	11.08	12.35	3.08	94.17	31.85	-7.74	39.59	11.88	20.7	22.65	-1.63	316.59	55.09	10.1	49.19	136.02	35.02	55.26	65.45
Erpeton_tentaculatum	27.11	8.54	6.44	10.85	33.77	20.49	13.28	26.86	26.31	28.39	25.54	1724.47	329.7	15.01	73.08	838.47	72.56	343.01	291.29
Erythrolamprus_ceii	23.16	13.14	5.72	34.25	33.92	10.72	23.21	26.67	19.26	26.93	18.38	716.55	128.72	8.47	71.31	351.55	37.27	331.56	50.04
Erythrolamprus_jaegeri	20.88	11.85	5.81	29.09	31.09	10.5	20.59	23.04	18.09	24.32	17.01	1361.56	192	49.36	42.37	523.03	172.74	441.05	192.62
Erythrolamprus_mimus	24.56	8.97	7.2	9.15	30.99	18.53	12.46	24.69	24.57	25.6	23.25	2469.9	374.87	49.04	54.04	1000.14	184.03	517.25	530.7
Eryx_jayakari	24.64	13.21	4.31	63.76	39.78	9.13	30.66	19.69	31.08	32.18	15.99	105.25	26.61	0.06	100.21	62.72	1.04	1.84	46.94
Eublepharis_turcmenicus	14.81	12.79	3.12	98.77	36.21	-4.21	40.42	11.53	26.4	27.5	2.01	220.19	38.03	2.47	63.86	101.85	10.14	12.77	72.92
Eulamprus_heatwolei	14.88	13.6	4.71	53.66	29.88	1.3	28.58	16.79	14.02	21.68	7.92	769.54	95.03	43.16	23.3	249.65	148.09	210.65	187.45
Euleptes_europaea	14.32	7.37	3.23	53.46	27.09	4.7	22.4	11.71	21.27	21.51	8.07	664.15	97.94	8.83	50.39	266.54	51.13	71.45	235.59
Eumeces_algeriensis	15.87	13.23	4.25	58.63	32.8	1.99	30.81	11.17	23.51	23.73	8.66	373.26	56.61	3.18	57.24	151.44	18.05	21.63	140.08
Euprepiophis_mandarinus	15.42	9.44	3.25	71.09	29.43	-0.19	29.62	22.51	6.45	24.04	5.74	1194.34	229.75	20.44	74.16	605.59	75.85	549.4	84.53
Eurolophosaurus_amathites	24.06	13.52	7.44	9.75	32.66	14.62	18.04	24.64	22.58	25.04	22.58	721	125.6	0.6	87.4	362.6	3.4	200	3.4
Eurolophosaurus_nanuzae	19.47	11.36	6.37	17.73	27.9	10.19	17.71	20.97	17.32	21.37	16.89	1414.48	313	8.3	85.37	788.11	28.56	561.78	47.26
Eurydactylodes_agricolae	22.08	7.2	5.46	21.26	28.37	15.33	13.04	24.74	19.98	24.74	19.28	1415	229	47.9	53.5	654	166.1	654	190.2
Eurydactylodes_occidentalis	22.6	7.4	5.5	22.41	29	15.6	13.4	25.4	20.4	25.4	19.7	1262	196	54	45	542	172	542	196
Eurydactylodes_symmetricus	20.74	7.3	5.23	24.1	27.57	13.72	13.85	23.77	19.81	23.77	17.54	1881.2	248.5	86.3	35.4	707.6	275.3	707.6	322.4
Eurydactylodes_vieillardi	21.65	7.33	5.35	22.94	28.23	14.64	13.59	24.52	19.93	24.52	18.61	1615.35	234.18	69.88	42.15	664.05	221.93	664.05	255.25
Eutropis_bibronii	28.05	8.37	5.05	25.76	36.08	19.39	16.7	27.51	26.07	30.95	24.44	1178.06	283.13	8.41	92.87	697.29	46.25	198.46	196.64
Eutropis_clivicola	25.78	7.93	6.28	11.73	32.73	20.18	12.55	25	26.03	27.6	24.6	2497.67	597	12.67	85	1419.83	70.5	368.33	997.83
Eutropis_nagarjuni	27.48	11.41	4.7	32.69	39.91	15.91	24	27.5	25.96	31.92	23.14	681.76	165.68	0.48	101.24	428.92	8.36	116.96	31.72
Eutropis_trivittata	26.19	11.32	4.65	35.01	38.58	14.01	24.57	26.69	22.8	30.76	21.54	1106.21	300.82	2.67	107.98	743.49	17.46	210.55	46.43
Exiliboa_placata	16.72	13.49	6.78	15.29	26.62	6.88	19.74	17.33	15.74	18.62	14.62	1389.44	263.89	18.11	84.33	735.78	62.67	356.67	126.56
Farancia_abacura	18.09	12.55	4.02	67.86	33.05	1.91	31.14	19.64	19	26.44	8.98	1321.6	154.7	71	23.5	423.33	245.03	365.72	323.93
Farancia_erytrogramma	17.92	12.82	4.13	66.48	32.66	1.87	30.78	21.35	16.26	26.13	9.06	1342.02	158.92	70.55	23.66	436.63	247.42	411.37	332.6
Ficimia_streckeri	22.83	12.52	4.8	47.88	35.05	8.86	26.19	26.65	17.77	28.24	16.12	816.99	162.55	20.22	62.87	367.93	78.11	293.79	88.64
Fordonia_leucobalia	26.42	10.08	6.82	15.49	33.67	18.11	15.56	27.11	24.72	28.07	24.12	1839.64	328.09	48.09	78.47	888.08	166.22	498.01	277.92
Furcifer_angeli	26.5	12.06	6.77	15.11	34.4	16.68	17.73	27.42	24.31	27.9	24.16	1491.04	447.78	1.23	122.22	1064.44	6.41	579.29	6.46
Furcifer_antimena	24.03	13.07	6.38	26.03	32.87	12.6	20.27	26.97	20.44	26.97	20.41	508.76	138	2.24	110.29	353.12	10.71	342.65	10.76
Furcifer_balteatus	20.39	10.89	6.29	24.81	28.39	11.19	17.2	23.13	18.36	23.18	16.91	1570.25	281.38	44.88	62.88	768.62	162	746.38	199.75
Furcifer_belalandaensis	24.1	12.5	6.2	26.48	33.3	13.3	20	27.3	21	27.3	20.6	358	84	4	91	219	16	219	18
Furcifer_bifidus	22.72	9.18	6.45	20.24	29.57	15.45	14.12	24.94	21.25	24.98	19.91	2063.79	325.02	59.54	55.72	914.84	229.12	910.43	307.1
Furcifer_campani	17.04	11.38	6.25	25.47	25.53	7.47	18.06	19.66	13.68	19.66	13.33	1372.19	290.38	23.64	86.6	773.04	76.3	762.77	79.04
Furcifer_cephalolepis	20.5	7.55	6.9	12.75	25.55	14.7	10.85	21.75	19.55	21.75	18.65	2181	348	56	51.5	929.5	233.5	929.5	275.5
Furcifer_labordi	25.09	13.03	6.31	25.01	33.58	13.1	20.48	27.65	21.51	27.69	21.5	711.84	218.26	0.9	123.94	522.8	4.76	489.74	4.78
Furcifer_lateralis	20.42	10.36	6.23	24.16	28.17	11.71	16.46	23.02	17.95	23.04	17.04	1885.73	344.48	45.24	72.55	948.48	170.48	925.76	221.05
Furcifer_minor	19.02	12.8	6.43	24.25	28.17	8.41	19.76	21.36	15.4	21.39	15.4	1331.75	311	10.75	99.75	827.5	34.58	770.17	34.58
Furcifer_oustaleti	22.88	12.26	6.55	21.82	31.34	12.75	18.59	24.97	20.1	25.1	19.69	1380.29	316.23	17.2	96.4	819.85	65.17	676.65	81.03
Furcifer_pardalis	23.89	9.03	6.58	17.48	30.4	16.78	13.62	25.71	22.44	25.78	21.44	2020.82	355.51	49.25	68.02	972.88	186.12	876.69	251.04
Furcifer_petteri	25.48	9.43	7.03	12.77	31.57	18.26	13.31	26.54	23.88	26.64	23.57	1467.17	347.92	18.17	97.03	905.78	69.5	719.08	74.81
Furcifer_polleni	25.3	6.5	6.45	13.36	30.25	20.2	10.05	26.4	23.35	26.55	23.35	1276	302.5	13	88.5	733	52.5	526	52.5
Furcifer_verrucosus	24.06	13.31	6.51	23.7	33	12.71	20.29	26.37	20.86	26.46	20.57	912.28	242.54	5.29	105.6	605.27	20.68	478.37	24.19
Furcifer_willsii	20.75	10.87	6.57	22.43	28.69	12.31	16.39	23.11	18.41	23.15	17.61	1750.86	333.99	36.74	78.49	913.12	139.04	900.79	173.94
Gallotia_atlantica	18.99	7.1	4.86	25.21	26.9	12.41	14.49	16.95	21.76	22.35	15.96	126.62	30.75	0	91.38	74.38	0	4.12	69.12
Gallotia_caesaris	17.4	6.85	4.4	28.69	26.15	10.7	15.45	15	20.7	21.45	14.1	348.5	73	0.5	86.5	197.5	4	11	172
Gallotia_galloti	15.27	7.1	4.2	32.42	24.96	8.17	16.79	12.5	19.21	19.86	11.63	452.29	90.14	1	83.43	249.86	7.14	14.43	211.57
Gallotia_intermedia	17.57	7.03	4.42	28.95	26.58	10.82	15.77	15.17	20.88	21.63	14.27	387.17	78.83	0.83	84.17	214.17	5.67	11	182.33
Gallotia_simonyi	17.6	6.85	4.45	28.19	26.2	10.95	15.25	15.3	20.85	21.55	14.4	315	67.5	0	88.5	181	2.5	10	139
Gallotia_stehlini	18.12	7.45	4.87	26.13	26.77	11.53	15.23	15.95	20.97	21.67	15	239.67	49.67	0.67	84.67	134.5	3.33	9.17	112.33
Gambelia_copeii	19.53	15.69	5.84	41.05	33.71	7.04	26.67	18.22	20.17	25.34	14.74	160.35	32.35	0.2	76.01	82.88	3.71	48.67	63.29
Gambelia_sila	16.01	15.83	4.64	63.46	35.14	1.42	33.72	9.31	24.12	24.18	8.13	304.73	57.67	0.42	82.44	162.24	3.63	5.93	155.95
Gambelia_wislizenii	13.61	16.27	4.35	74.54	33.48	-3.84	37.32	15.15	15.74	23.28	4.22	273.44	44.17	8.09	48.51	115.21	32.12	84.99	65.05
Gastropholis_prasina	23.87	10.42	6.88	15.13	31.42	16.44	14.98	24.76	22.82	25.61	21.8	963.31	181.81	20	61.31	429.25	81.06	254.38	122.38
Geckolepis_maculata	25.08	10.81	6.6	17.75	32.37	16.1	16.28	26.67	22.96	26.87	22.48	1560.54	366.42	21.48	98.58	922.15	83.2	688.46	108.8
Geckolepis_typica	24.49	13.49	6.52	23.99	33.46	12.91	20.55	26.85	21.31	26.94	20.97	891.1	232.79	5.65	104.08	586.12	22.28	462.37	26.73
Gehyra_australis	23.71	12.51	5.52	33.66	33.98	11.31	22.67	26.79	19.54	27.48	18.89	992.62	219.01	12.77	88.25	591.47	47.27	398.97	54.08
Gehyra_barea	26.86	6	7.42	7.23	31.22	23.14	8.08	26.28	26.94	27.56	25.78	2450.6	379.6	85	40.6	968.2	325.8	523	761
Gehyra_borroloola	25.85	11.82	5.8	26.98	35.1	14.76	20.34	27.92	22.52	28.76	21.88	1097.37	286.15	4.08	114.87	759.85	15.42	490.4	20.19
Gehyra_brevipalmata	27.33	6.9	8.77	2.45	31.37	23.53	7.83	27.33	27.3	27.63	27.03	3551.33	418.67	183	24	1168.33	593.33	889	706.67
Gehyra_dubia	22.18	13.58	5.24	43.49	34.14	8.16	25.99	26.77	17.34	27.17	16.09	758.67	155.42	15.36	71.3	410.96	58.05	341.55	65.33
Gehyra_pilbara	26.55	14.77	5.28	43.47	38.59	10.87	27.72	30.16	21.01	31.13	20.23	498.09	134.39	1.7	108.08	332.98	11.56	234	13.12
Gekko_athymus	25.09	7.87	7.63	5.74	30.13	19.87	10.27	24.78	25.18	25.77	24.58	1754.22	238	27.78	50.78	666.44	119	368.44	600.22
Gekko_auriverrucosus	12.55	11.25	2.8	100.36	31.03	-8.38	39.4	23.33	-1.13	25.08	-1.13	520.25	114	5	81.25	290.75	16	269.75	16
Gekko_badenii	25.52	9.44	6.1	12.56	32.99	17.55	15.45	25.72	24.32	27.01	23.78	2131	401.65	8.95	77.7	1065.45	49.5	479.15	137.8
Gekko_chinensis	22.11	7.52	3.48	49.7	31.75	10.3	21.44	26.82	16.58	27.67	15.16	1661.68	296.06	27.72	68.95	801.03	100.97	738.2	122.79
Gekko_grossmanni	25.4	7.7	6.22	15.69	31.44	19.16	12.27	25.21	23.72	27.05	23.17	1162.64	270	13.91	82.18	658.36	63.64	204.55	154.36
Gekko_hokouensis	17.87	7.96	2.84	70.56	31.65	3.5	28.15	22.33	10.7	26.48	8.42	1691.91	282.53	43.91	55.1	751	160.18	612.9	199.45
Gekko_mindorensis	26.06	7.69	7.54	6.75	31.53	21.41	10.13	25.9	25.8	26.94	25.17	2434.04	374.64	47.71	53.88	1018.07	180.16	513.44	349.29
Gekko_porosus	25.05	6.28	5.06	21.22	30.81	18.56	12.25	26.18	24.05	27.31	21.98	2914.62	407.5	76	44	1135.88	300.5	796.62	594.62
Gekko_romblon	26.23	6.8	7	8.11	31.5	21.87	9.63	26.37	26.03	27.23	25.07	2423.33	364.67	43.33	54.33	954	150	481	354
Gekko_smithii	25.5	8.99	7.91	8.11	31.56	19.32	12.24	25.56	24.88	26.36	24.33	2626.43	359.94	107.69	42.81	989.94	361.65	635.33	604.13
Gekko_swinhonis	11.93	10.84	2.78	97.93	30.02	-8.06	38.08	23.34	-1.03	24.08	-1.32	634.92	158.64	9.64	90.22	366.84	34.18	358.19	35.09
Geophis_carinosus	20.81	12.02	6.71	16.8	29.68	11.9	17.78	21.81	20.1	22.58	18.39	2133.79	373.48	47.21	66.17	982.99	164.46	500.32	238.03
Geophis_godmani	19.93	9.45	7.93	5.8	26.06	14.19	11.86	19.74	19.85	20.62	19.14	2813.43	427.5	54.07	55.14	1133.29	201.93	575.36	559.5
Gerarda_prevostiana	26.5	8.05	6.69	8.84	32.67	20.43	12.24	26.16	26	27.67	25.42	2851	656.84	33.77	86.06	1672.75	121.98	501.62	401.61
Gerrhonotus_infernalis	19.02	15.41	5.17	52.15	33.14	3.23	29.92	23.62	14.11	25.09	11.84	405.5	72.27	10.64	64.5	183.84	41.13	155.8	47.8
Gerrhonotus_liocephalus	19.89	13.81	6.87	16.08	29.66	9.73	19.93	20.83	18.41	21.72	17.61	1168.14	238.96	11.72	89.47	639.62	41.76	327.26	64.4
Gerrhonotus_parvus	20	14.2	5.6	38.77	31.95	6.7	25.25	22.6	14.75	24.55	14.75	725	154	17.5	69	339	57	271.5	57
Gerrhopilus_hedraeus	25.16	8.74	7.46	8.09	31.2	19.46	11.75	24.99	24.7	26.12	24.02	2549.93	405.5	76.83	51.31	1071.9	263.69	577.96	472.65
Gerrhosaurus_skoogi	18.77	7.9	5.81	19.13	24.89	11.54	13.36	21.05	16.87	21.07	16.17	38.59	14.67	0	123.89	31.5	0	30.45	0.02
Gloydius_saxatilis	3.28	10.52	2.21	132.52	25.8	-21.83	47.63	18.39	-12.81	19.27	-14.78	797.57	162.2	15.43	74.97	408.49	56.95	391.07	61.76
Gonatodes_alexandermendesi	22.52	9.69	8.29	4.31	28.53	16.92	11.61	22.36	22.48	23.03	21.95	2123.14	322.24	68.51	46.48	881.58	251.46	423.83	390.42
Gonatodes_caudiscutatus	21.85	9.78	7.71	9.91	28.45	15.65	12.8	22.96	20.96	23.1	20.64	1199.35	226.42	26.83	98.02	614.27	96.03	561.93	126.94
Gonatodes_ceciliae	25.67	8.48	7.96	6.43	30.78	20.19	10.59	25.94	25.29	26.21	24.64	1759	254	47.11	48.67	684.67	164.11	475.22	306.78
Gonatodes_concinnatus	25.65	9.63	8.54	4.67	31.24	20.03	11.21	25.42	25.62	26.12	24.94	2893.53	309.13	174.42	17.57	880.99	566.46	670.03	714.88
Gonatodes_falconensis	24.03	10.23	7.93	5.7	30.32	17.47	12.84	24.03	23.47	24.59	23.22	1014.37	158.38	16.73	54.61	424.12	68.94	259.09	169.39
Gonatodes_hasemani	25.84	10.65	7.58	5.19	32.79	18.63	14.16	25.8	25.36	26.39	25.11	2207.33	311.63	50.08	51.5	879.91	186.02	450.93	381.04
Gonatodes_petersi	23.04	10.23	8.07	5.81	29.18	16.6	12.58	23.07	22.4	23.66	22.17	1642.22	257.33	24.89	58.78	682.67	107.56	405.44	125.78
Gonatodes_seigliei	20	9.67	7.97	6.41	25.9	13.83	12.07	20.27	19.3	20.6	19	1399	201.33	32.67	49.33	560.33	121.33	334.67	156
Gonatodes_superciliaris	23.1	10.6	8.6	2.72	29.2	17	12.2	22.9	22.9	23.3	22.7	3363	479	72	49	1371	300	795	403
Gonatodes_taniae	22.4	10.45	7.85	6.25	28.7	15.4	13.3	22.5	21.65	23.1	21.45	1098	149	23.5	49	427.5	84.5	297	130
Gonionotophis_capensis	21.56	13.58	6.12	28.3	31.55	9.12	22.43	23.99	17.9	24.46	17.45	730.99	151.6	7.25	87.23	402.12	29.69	295.44	49.72
Gonionotophis_nyassae	22.9	13.01	5.96	26.27	32.89	10.94	21.95	24.91	19.72	25.62	19.06	840.63	189.82	5	97.75	519.47	20.64	314.75	29.93
Goniurosaurus_catbaensis	23.63	6.4	3.5	44.74	32.13	13.93	18.2	28.28	18.78	28.65	17.58	1806	407.5	13.75	94.75	1119.25	63	1017.75	66.5
Goniurosaurus_kuroiwae	21.9	5.42	2.92	45.29	30.76	12.46	18.3	26.3	16.02	27.52	16.02	2211.4	292.6	116	30.6	766	369	648.8	369
Gonocephalus_grandis	25.51	8.49	8.81	3.18	30.48	20.88	9.6	25.29	25.49	25.84	25.07	2839.19	335.97	145.72	26.15	923.83	483.69	680.57	785.22
Gonyosoma_oxycephalum	25.64	9.04	7.38	9.48	32.02	19.01	13	25.67	24.74	26.71	24.28	2391.97	360.4	79.98	52.8	970.44	273.94	563.65	466.37
Graciliscincus_shonae	21.3	7.07	5.17	23.98	27.95	14.37	13.58	24.3	20.37	24.3	18.1	1891.17	248.33	86.17	34.17	691.67	275.67	691.67	328.17
Gyalopion_canum	17.42	16.57	4.94	61.75	33.68	0.13	33.55	23.54	13.02	24.95	9.19	368.88	74.67	7.79	74.33	190.97	30.07	158.81	40.65
Gymnophthalmus_cryptus	25.76	10.97	7.64	6.9	33.61	19.33	14.28	24.85	26.21	26.63	24.82	2743.58	474.5	30.67	69.1	1328.99	134.4	267.02	1324.98
Gymnophthalmus_underwoodi	26.33	9.17	8.01	5.75	32.67	21.28	11.39	25.9	26.99	27.1	25.65	2164.76	355.58	65.45	52.68	937.02	228.81	254.64	704.51
Gymnophthalmus_vanzoi	27.29	9.83	8.34	6.22	33.2	21.49	11.71	26.44	27.49	27.84	26.24	1498.43	335.71	18.71	84.57	859	67.29	151.86	811.14
Haemodracon_riebeckii	25.48	7.77	5.53	19.27	33.06	19.08	13.98	23.44	27.83	27.83	23.16	95.1	21	2.1	61.4	43.3	9.8	9.8	26.1
Hakaria_simonyi	25.48	7.77	5.53	19.27	33.06	19.08	13.98	23.44	27.83	27.83	23.16	95.1	21	2.1	61.4	43.3	9.8	9.8	26.1
Hellenolacerta_graeca	14.61	9.77	3.68	58.25	29.29	3.2	26.09	9.11	22.18	22.2	7.56	775.41	138.99	9.46	67.85	373.79	36.99	41.98	344.54
Heloderma_horridum	24.32	14.53	6.53	25.55	34.98	12.51	22.47	26.55	23.76	27.32	20.9	1049.48	259.49	4.23	107.21	680.43	19.66	421.36	61.99
Heloderma_suspectum	18.75	16.41	4.69	68.6	36.7	1.9	34.8	23.99	21.07	27.59	10.21	332.33	72.33	4.39	68.7	168.43	22.13	145.08	78.05
Hemachatus_haemachatus	16.11	13.78	5.54	38.22	27.47	2.65	24.82	19.02	12.12	20.53	10.84	663.81	104.11	14.19	56.56	289.59	50.79	266.54	66.23
Hemerophis_socotrae	25.48	7.77	5.53	19.27	33.06	19.08	13.98	23.44	27.83	27.83	23.16	95.1	21	2.1	61.4	43.3	9.8	9.8	26.1
Hemidactylus_aaronbaueri	24.03	11.54	5.26	23.64	34.55	12.81	21.74	24.09	22.45	27.26	21.01	2054.82	824.27	0	142.91	1628.36	2.36	317.36	5.64
Hemidactylus_albofasciatus	26.38	7.96	5.62	14.69	33.1	19.04	14.06	26.24	25.26	28.42	24.64	3520.8	1337.2	0	145.2	2904.8	1.2	645.2	7.4
Hemidactylus_depressus	26.71	7.67	6.91	10.34	32.33	21.25	11.08	25.77	27.31	27.8	25.21	1939.65	341.21	44.42	61.97	861.67	196.16	389.92	600.85
Hemidactylus_dracaenacolus	24.9	7.75	5.5	19.67	32.5	18.45	14.05	22.8	27.3	27.3	22.55	104.5	21.5	2.5	56	45	11.5	11.5	28
Hemidactylus_forbesii	26	9.06	6.18	15.62	33.74	19.22	14.52	24.3	27.9	27.9	24	61	21.8	0.2	106	39	2	3.8	18.8
Hemidactylus_foudaii	23.15	12.15	5.25	40.17	34.8	11.85	22.95	21.7	18.05	28	17.9	35.5	17	0	132.5	25.5	1	5.5	4
Hemidactylus_frenatus	25.33	9.98	6.47	19.86	33.28	16.49	16.79	26.33	23.21	27.53	22.49	1906.56	320.88	57.98	70.31	851.41	198.89	511.77	313.5
Hemidactylus_giganteus	26.89	11.23	4.9	30.1	38.88	15.91	22.96	26.68	24.56	31.06	22.99	846.31	213.77	1.55	101.29	542.92	9.59	150.23	35.98
Hemidactylus_gracilis	26.08	12.71	4.6	37.81	40.18	12.66	27.52	26.34	23.22	31.38	21.27	1120.12	355.5	2.67	124.76	848.27	14.21	181.23	22.5
Hemidactylus_granti	24.9	7.75	5.5	19.67	32.5	18.45	14.05	22.8	27.3	27.3	22.55	104.5	21.5	2.5	56	45	11.5	11.5	28
Hemidactylus_homoeolepis	26.04	10.8	5.02	34.09	36.48	15.09	21.38	24.85	25.61	29.96	21.19	48.05	11.84	0.68	82.54	26.65	3.29	8.54	10.82
Hemidactylus_imbricatus	24.34	14.71	4.59	59.28	38.71	6.95	31.75	23.9	23.25	31.06	15.87	158.2	50.48	1.48	102.84	97.59	7.76	62.18	36.51
Hemidactylus_lemurinus	23.72	10.04	5.3	28.16	32.77	13.94	18.84	21.64	25.13	27.02	19.86	73.31	16.04	0.72	74.13	34.17	6.41	8.5	22.49
Hemidactylus_maculatus	26.09	10.03	5.23	25.71	36.04	16.26	19.79	25.94	23.85	29.5	22.74	1643.05	502.81	5.54	107.55	1133.67	26.23	244.97	278.07
Hemidactylus_mercatorius	22.88	12.24	6.55	21.78	31.33	12.77	18.56	24.97	20.11	25.1	19.7	1382.63	316.51	17.28	96.31	820.5	65.48	677.16	81.47
Hemidactylus_mindiae	15.92	11.73	4.31	55.29	29.05	2.26	26.79	9.37	21.45	22.54	8.43	27.2	5.3	0	76.8	13.4	0	0	13.2
Hemidactylus_oxyrhinus	26	9.06	6.18	15.62	33.74	19.22	14.52	24.3	27.9	27.9	24	61	21.8	0.2	106	39	2	3.8	18.8
Hemidactylus_palaichthus	25.48	9.67	8.13	5.4	31.8	19.93	11.87	25.05	25.75	26.12	24.75	2326.6	341.27	72.74	49.09	927.08	262.85	372.09	741.7
Hemidactylus_prashadi	25.05	9.76	5.69	16.07	33.8	16.71	17.09	24.36	24.62	27.52	23.5	2568.83	960.83	0.1	129.95	2005.98	4.7	256.13	428.14
Hemidactylus_pumilio	25.48	7.77	5.53	19.27	33.06	19.08	13.98	23.44	27.83	27.83	23.16	95.1	21	2.1	61.4	43.3	9.8	9.8	26.1
Hemidactylus_reticulatus	26.71	10.44	5.14	27.13	37.5	16.73	20.77	26.33	24.63	30.4	23.19	1128.33	299.3	4.39	98.32	713.03	21.3	181.96	203.42
Hemidactylus_sataraensis	23.35	10.15	5.4	19.99	33.4	14.65	18.75	22.55	23.05	26.5	21.6	1807	731.5	0	139.5	1369.5	5	95	47.5
Hemidactylus_turcicus	17.27	10.99	3.95	59.04	31.87	4.39	27.48	10.95	24.26	24.74	9.74	411.75	74.49	3.76	71.61	198.42	18.86	24.53	190.91
Hemiergis_decresiensis	16.54	13.42	4.7	53.13	31.51	3.23	28.28	18.21	15.5	23.27	9.64	497.41	60.61	27.08	23.69	161.63	92.85	127.63	122.13
Hemiphyllodactylus_aurantiacus	23.91	9.78	5.77	18.14	32.65	15.78	16.87	23.56	23.12	26.41	21.63	1416.77	396.32	6.17	87.96	849.59	27.88	222.74	339.58
Hemirhagerrhis_hildebrandtii	24.89	13.66	6.41	23.96	35.41	13.59	21.81	26.15	22.66	27.64	21.6	614.36	139.82	3.92	104.89	343.89	18.57	157.62	107.93
Hemitheconyx_caudicinctus	26.93	12.86	6.26	18.46	37.2	16.58	20.62	25.77	26.03	29.55	24.83	1063.58	251.03	2.29	100.34	636.07	14.21	150.8	281.33
Hemorrhois_algirus	20.75	13.54	4.4	60.73	37.01	5.87	31.14	18.4	26.22	28.53	12.87	99.68	18.21	0.88	66.72	45.4	5.84	11.48	36.25
Hemorrhois_hippocrepis	15.6	11.18	3.9	58.49	31.56	3.26	28.3	11.13	22.48	23.42	8.47	503.83	73.11	6.14	52.09	200.21	34.77	41.34	184.23
Heterodon_nasicus	12.57	15.15	3.98	83.27	32.01	-6.92	38.94	20.68	3.33	23	1.55	480.22	85.57	12.44	62.91	219.79	45.4	190	49.87
Heterodon_platirhinos	13.69	12.61	3.5	83.72	31.44	-4.7	36.14	18.85	7.44	24.07	2.44	1071.73	126.24	54.95	26.77	344.52	188.66	305.4	219.93
Heterodon_simus	18.82	12.79	4.3	62.34	32.84	3.25	29.58	23.44	16.4	26.46	10.49	1324.24	164.51	64.58	27.99	454.46	231.44	444.14	309.25
Heteroliodon_occipitalis	24.79	12.98	6.5	22.94	33.4	13.57	19.83	27.02	21.74	27.14	21.44	920.12	247.29	4.08	105.59	614.17	16.92	454.34	20.79
Hierophis_gemonensis	13.73	8.91	3.34	61.31	28.28	2.05	26.23	8.56	20.73	21.7	6.15	982.97	148.17	29.21	50.71	403.32	104.33	108.59	358.29
Hierophis_viridiflavus	11.28	8.68	3.4	58.88	25.15	-0.02	25.18	10.44	13.21	18.86	3.84	856.03	98.69	45.71	23.3	269.57	158.69	186.27	219.52
Holbrookia_lacerata	20.36	13.76	4.19	66.35	35.7	3.25	32.45	25.11	12.48	28.34	11.3	592.74	95.2	22.2	47.06	218.45	81.64	170.75	84.92
Holbrookia_maculata	13.55	16.32	4.32	77.39	32.68	-5.39	38.08	21.56	6.65	23.39	3.49	448.17	80.96	10.81	64.38	211.71	39.62	184.07	48.59
Holbrookia_propinqua	21.72	12.49	4.14	60.54	35.73	5.99	29.75	26.01	15.17	28.88	13.34	692.96	112.54	27.23	43.77	251.49	106.55	187.91	114.52
Holcosus_quadrilineatus	25.19	9.63	7.63	6.71	31.89	19.32	12.56	24.75	25.45	26.13	24.38	3157.96	494.93	66.43	55.19	1262.09	251.84	515.97	974.08
Holcosus_undulatus	25.16	11.35	6.6	17.5	33.6	16.44	17.16	26.16	24.46	27.07	22.69	1581.44	295.69	25.93	75.8	771.75	92.37	402.34	182.37
Homalopsis_buccata	25.51	9.28	7.1	11	32.29	18.34	13.95	25.67	24.38	26.73	23.92	2281.55	366.86	64.13	58.93	989.04	225.39	516.23	401.81
Homonota_andicola	14.02	15.86	5.01	56.64	30.44	-0.94	31.37	16.83	10.43	21.2	6.74	209.95	31.22	8.02	43.45	82.33	28.4	70.64	36.13
Homonota_borellii	19.05	13.97	4.86	49.45	32.89	4.36	28.53	24.8	12.46	25.12	12.42	578.55	107.49	6.61	76.34	292.11	23.66	289.19	23.7
Homonota_darwinii	10.61	13.25	4.9	50.52	25.32	-1.39	26.71	6.51	13.93	17.02	4.09	221.55	32.36	10.2	34.31	87.06	34.41	38.76	76.13
Homonota_fasciata	12.28	13.75	5.03	48.35	26.33	-0.77	27.1	13.38	10.55	18.28	5.93	352.78	58.48	9.51	53.02	157.41	33.49	125.72	59.87
Homonota_underwoodi	15.37	15.52	4.94	55.98	31.36	0.2	31.16	20.09	9.28	22.39	8.1	268.22	44.64	7.52	55.56	117.69	27.61	110.91	28.76
Homopholis_walbergii	20.43	13.9	5.71	32.98	30.88	6.69	24.19	23.52	15.8	23.76	15.64	657.6	142.76	4.3	91.75	391.78	17.59	304.04	18.78
Hydrelaps_darwiniensis	27.13	9.56	6.07	20.27	34.22	18.24	15.98	28.57	24.95	29.23	24.07	1290.28	290.82	12.61	103.12	789.22	46.45	433.69	64.26
Hydromorphus_concolor	24.83	9.16	7.1	9.86	31.49	18.63	12.86	24.99	24.87	25.94	23.41	2504.38	384.26	50.67	53.87	1024.85	188.95	530.53	536.85
Hydrophis_atriceps	26.67	7.98	7.87	5.98	31.87	21.7	10.17	26.58	26.42	27.28	25.8	2266.06	333.65	83.86	45.95	896.01	289.29	503.11	538.4
Hydrophis_caerulescens	26.48	8.17	6.6	15.13	32.85	19.6	13.25	26.84	25.33	28.16	24.34	2166.88	415.04	49.28	74.58	1081.29	177.96	483.88	465.7
Hydrophis_cyanocinctus	26.42	8.06	7.03	13.33	32.53	20.16	12.37	26.34	25.98	27.91	24.55	2211.63	357.15	71.79	59.28	958.79	249.09	517.97	469.84
Hydrophis_czeblukovi	27.35	9.02	6.3	17.28	33.61	19.04	14.57	28.52	25.56	29.06	24.7	1236.06	293.09	13.87	107.61	766.32	49.49	390.85	64.16
Hydrophis_elegans	26.12	8.65	6.7	16.32	32.58	18.94	13.64	26.88	24.97	27.89	23.74	1799.36	286.63	61.2	68.52	788.95	209.3	532.72	284.46
Hydrophis_kingii	26.24	8.99	5.97	20.19	33.11	17.86	15.26	27.76	24.12	28.39	23.24	1416.9	299.07	18.41	93.57	819.22	70.38	505.46	102.05
Hydrophis_lapemoides	26.64	9	5.04	31.36	35.52	16.6	18.92	24.72	27.51	30.27	22.29	1680.46	394.9	7.23	103.67	1045.21	34.65	322.76	241.09
Hydrophis_macdowelli	25.97	9.26	5.81	22.41	33.15	17.1	16.05	27.85	23.8	28.4	22.68	1298.43	280.91	15.5	94.1	767.63	57.39	488.14	77.41
Hydrophis_major	25.7	9.29	5.87	22.8	33.12	17	16.12	26.94	24	28.24	22.42	1335.4	265.91	24.23	87.13	728.14	87.96	471.72	132.7
Hydrophis_melanocephalus	23.41	6.32	3.66	41.11	31.84	14.08	17.76	26.83	19.39	28.16	17.82	1751.27	322.28	41.56	67.86	845.32	142.35	645.89	187.05
Hydrophis_ornatus	25.75	8.13	6.62	17.75	32.46	18.82	13.64	26.11	24.81	27.81	23.32	2093.77	341.86	66.33	60.51	914.66	230.36	515.56	425.06
Hydrophis_pacificus	26.89	8.99	6.12	18.07	33.75	18.87	14.87	28	24.7	28.82	24.16	1517.73	322.54	16.53	99.05	893.96	62.29	505.13	84.3
Hydrophis_parviceps	26.8	6.71	6.39	9.85	32.2	21.77	10.43	26.97	25.98	28.07	25.46	1592.22	273.78	1.44	80.56	756.89	11.78	466.89	38.67
Hydrophis_semperi	27.22	8.02	6.5	9.86	33.8	21.56	12.24	27.08	26.42	28.62	25.98	2397.8	595.4	8.2	97.8	1483.4	32	508	75
Hydrophis_spiralis	26.54	8.26	7.19	12.25	32.67	20.26	12.41	25.98	26.65	27.92	24.84	2163.6	354.44	69.54	59.74	948.58	242.5	474.45	494.97
Hypnale_nepa	22	8.85	7.05	7.92	28.79	16.3	12.49	21.68	21.74	22.96	20.91	2743.46	352.62	106.23	34.38	969.62	383.92	693.23	581.31
Hypsiglena_torquata	15.04	15.81	4.53	68.56	33.24	-1.87	35.11	17.65	14.39	23.8	6.26	393.67	70.33	10.12	57.14	178.37	39.17	128.64	80.42
Hypsilurus_bruijnii	21.33	7.42	8.45	4.73	25.97	17.24	8.73	21.34	21.37	21.71	20.55	2994.75	303.48	193.98	13.67	872.9	611.62	694.56	708.35
Iberolacerta_aranica	4.75	7.9	3.35	54.22	17.75	-5.35	23.1	5.95	5.4	12	-1.7	1232	130	83.5	12.5	352	276.5	285.5	283
Iberolacerta_aurelioi	3.1	7.3	3.2	53.6	15.9	-6.6	22.5	4	10.4	10.4	-3	1322	139	88	12	370	301	301	308
Iberolacerta_bonnali	3.85	7.97	3.42	53.22	16.7	-6.32	23.02	5.05	8.82	11	-2.48	1262	131.83	83.17	12.33	357.17	280	281.5	300.67
Iberolacerta_cyreni	9.86	10.79	3.66	62.59	27.1	-1.99	29.09	8.03	18.28	18.37	2.52	540.48	66.32	17.4	31.96	172.4	74.92	79.72	143.24
Iberolacerta_galani	7.83	10.07	3.77	55.76	23.4	-2.87	26.27	1.8	15.37	15.37	1.2	1011.33	129.67	30.67	38.33	373.67	121.33	121.33	360
Iberolacerta_horvathi	6.34	8.68	3.09	66.55	21.1	-6.53	27.63	10.41	2.67	14.75	-2.32	1254.53	143.13	69.57	23.58	415.34	224.57	357.06	254.43
Iberolacerta_monticola	10.12	9.17	3.99	46.75	23.15	0.4	22.75	6.2	16.25	16.37	4.5	996.56	128.51	37.97	32.31	354.7	141.7	149.86	317.79
Iguana_delicatissima	24.24	7.41	7.18	10.19	29.08	18.82	10.26	25.04	23	25.27	22.76	2407	301.56	95.22	35.22	847.78	328.33	772.89	342.33
Imantodes_inornatus	25.21	8.9	8.31	4.6	30.81	20.09	10.72	25.13	25.29	25.79	24.61	3508.79	466.61	121.76	45.27	1268.57	425.43	764.49	941.82
Iranolacerta_brandtii	8.8	12.15	3.25	83.64	29.08	-7.75	36.82	6.74	19.08	19.18	-2.04	351.99	57.4	9.29	49.87	150.76	34.22	41.44	90.13
Iranolacerta_zagrosica	8.1	16	3.9	84.32	30.1	-10.7	40.8	-1.7	18.7	18.8	-3	262	50	0	86	133	4	5	125
Isopachys_anguinoides	26.52	8.85	6.48	10.95	33.25	19.7	13.55	26.28	25.49	27.78	24.94	1740.13	296.59	22.42	63.42	758.16	99.94	388.3	310.92
Ithycyphus_miniatus	25.43	12.29	6.68	17.35	33.47	15.13	18.35	26.75	22.9	27.04	22.78	1389.7	375.49	5.31	112.12	924.74	21.77	565.02	23.96
Ithycyphus_oursi	24.04	14	6.41	27.17	33.6	11.94	21.66	26.9	20.5	26.93	20.12	634.7	157.72	5.36	99.92	412.31	21.22	386.26	26.31
Janetaescincus_braueri	25.67	4.17	6.6	6.05	29.27	23	6.27	25.63	25.07	26.47	24.87	2238.33	378	68.33	48.33	955.33	233	539.67	290
Janetaescincus_veseyfitzgeraldi	25.99	4.17	6.64	6.08	29.59	23.36	6.23	25.96	25.43	26.79	25.23	2195.57	371.14	67	48.43	937.43	228.14	527.86	283.86
Japalura_flaviceps	2.98	13.9	4.32	61.8	16.71	-15.14	31.85	10.28	-4.76	10.37	-5.42	710.42	148.56	4.09	88.86	400.84	17.9	399.19	18.9
Japalura_tricarinata	17.29	10.29	4.6	43.58	26.46	4.35	22.11	21.71	11.72	21.75	10.82	1916.31	491.41	7.01	104.49	1254.84	36.79	1197.87	43.69
Japalura_variegata	18.97	10.66	4.45	44.74	28.43	4.7	23.73	23.36	13.08	23.45	12.36	1982.58	517.49	2.65	107.55	1306.54	24.84	1219.58	27.46
Kanakysaurus_viviparus	23.8	7	5.7	18.65	29.6	17.5	12.1	26.1	21.9	26.1	21.3	1437	233	51	53	652	165	652	187
Kentropyx_viridistriga	24.08	12.8	6.37	21.8	33.52	13.36	20.16	25.91	21.37	26.42	21	1390.48	223.37	21.56	59.71	616.72	86.28	438.61	110.67
Kinyongia_adolfifriderici	23.37	11.24	8.31	4.98	30.53	17.08	13.45	22.91	23.55	23.96	22.67	1782.22	211.63	60.95	32.42	580.37	218	428.26	517.18
Kinyongia_boehmei	23	10.67	6.86	15.12	31.16	15.73	15.43	23.66	20.94	24.74	20.93	776.14	145.57	11	72.14	322.43	45.71	186.14	53.71
Kinyongia_carpenteri	13.6	10.7	8.55	3.32	20.25	7.8	12.45	13.45	13.55	14	13.15	1581	194	71	32	525.5	266	445	300
Kinyongia_excubitor	18.95	16.25	8.45	8.8	29	9.85	19.15	19.4	17.65	19.9	17.65	1627	373	26.5	90	761	97.5	525.5	97.5
Kinyongia_fischeri	21.7	12.3	7.1	16.68	30.2	13.1	17.1	23.2	19.4	23.6	19.4	955	148	16	55	381	63	353	63
Kinyongia_matschiei	24.1	9.9	6.5	16.65	32.1	17	15.1	24.9	22	26.2	21.9	1188	185	47	49	486	162	233	176
Kinyongia_multituberculata	19.95	10.4	6.4	18.08	28.55	12.45	16.1	20.65	17.6	22.05	17.55	1045.5	209	34	65.5	513	113	243.5	124
Kinyongia_oxyrhina	18.7	10.78	6.58	14.82	26.7	10.46	16.24	19.56	16.86	20.22	16.48	1094	229.4	3	92.6	599.6	16.4	315.2	18.8
Kinyongia_tavetana	16.1	10.67	6.77	14.79	24.47	8.83	15.63	16.73	14.13	17.7	13.93	1162.67	256.67	14.67	77.33	540.67	51.67	315.67	62.67
Kinyongia_tenuis	24.1	9.9	6.5	16.65	32.1	17	15.1	24.9	22	26.2	21.9	1188	185	47	49	486	162	233	176
Kinyongia_uthmoelleri	16.47	10.04	6.74	14.1	23.86	9.06	14.8	17.26	14.72	17.77	14.32	932.55	202.91	6.91	80.09	451.91	23.91	395.82	30.09
Kinyongia_vosseleri	24.1	9.9	6.5	16.65	32.1	17	15.1	24.9	22	26.2	21.9	1188	185	47	49	486	162	233	176
Kinyongia_xenorhina	13.6	10.7	8.55	3.32	20.25	7.8	12.45	13.45	13.55	14	13.15	1581	194	71	32	525.5	266	445	300
Lacerta_agilis	3.79	9.89	2.41	111.29	24.77	-16.29	41.06	15.68	-7.43	17.57	-10.9	508.12	71.64	22.98	38.12	190.85	77.26	185.65	90.39
Lacerta_bilineata	11	8.72	3.48	57.41	24.68	-0.11	24.79	10.04	12.92	18.39	3.73	834.15	95.2	45.86	21.33	260.52	158.25	184.14	213.12
Lacerta_media	11.1	12.49	3.38	83.43	30.78	-5.65	36.42	6.39	19.52	21.57	0.2	509.41	82.62	8.54	61.66	220.92	31.35	43.5	181.89
Lacerta_pamphylica	14.72	10.4	3.6	65.77	30.27	1.74	28.53	6.46	23.06	23.13	6.46	861.06	177.42	5.12	83.52	483.48	23.06	27.64	483.48
Lacerta_schreiberi	12.01	9.37	3.88	50.4	25.77	1.83	23.94	7.88	18.6	18.73	5.9	924.61	123.69	25.32	38.99	340.79	105.63	112.69	318.84
Lacerta_strigata	11.13	10.53	2.99	84.7	29.66	-4.99	34.65	13.93	10.47	21.8	0.19	463.22	70.35	17.39	42.11	181.77	60.75	110.29	92.96
Lacerta_trilineata	12.22	10.15	3.41	68.15	28.27	-1.05	29.32	7.22	19.03	20.93	3.54	699.43	104.51	22.43	43.25	278.33	80.3	92.36	255.35
Lacerta_viridis	10.13	9.51	3.06	75.41	26.38	-4.3	30.68	14	7.51	19.56	0.24	686.01	88.84	35.29	28.88	239.22	116.55	181.79	167.71
Lacertoides_pardalis	22.05	6.9	5.15	23.53	28.55	15.25	13.3	25	21.15	25	18.95	2008.5	262.5	90.5	34	723	291.5	723	350
Laemanctus_longipes	24.93	9.74	6.29	17.76	32.64	17.22	15.42	25.9	24.69	26.8	22.36	2033.65	337.34	48.4	59.14	885.39	168.36	485.97	291.16
Lampropeltis_alterna	18.97	15.22	4.77	60.49	33.93	2.16	31.78	24.64	13.33	26.18	10.75	349.3	66.85	7.88	66.96	166.68	30.79	139.67	36.7
Lampropeltis_calligaster	15.29	12.89	3.59	81.57	32.8	-3	35.8	18.82	10.68	25.43	4.34	1114.25	131.42	57.35	26.16	353.76	197.62	296.93	236.38
Lampropeltis_getula	16.12	14.37	4.2	71.51	33.28	-1.02	34.3	19.22	13.84	25.1	6.73	781.2	106.87	33.86	45.67	282.59	119.42	221.64	174.1
Lampropeltis_mexicana	17.21	16.59	6.33	30.37	29.76	3.75	26.02	19.84	15.26	20.56	12.93	494.24	104.12	7.05	81.21	272.79	29.37	193.81	44.68
Lampropeltis_pyromelana	12.6	17.28	4.87	65.19	31	-4.45	35.45	18.24	14.17	21	4.4	511.07	106.28	10.82	65.77	260.1	44.95	224.54	101.71
Lampropeltis_ruthveni	17.14	15.65	6.46	21.98	28.91	4.84	24.07	18.64	16.52	19.68	14.02	888.04	205.6	6.2	100.72	555.58	26.91	257.22	36.78
Lampropeltis_webbi	18.85	11.95	5.85	28.38	28.55	8.3	20.25	21.4	19.3	22.05	14.9	1184.5	293	8.5	93	738.5	46.5	539.5	149
Lampropeltis_zonata	11.48	14.68	4.82	55.75	29.18	-1.24	30.41	5.35	18.56	18.9	4.95	850.38	155.05	4.57	77.66	429.4	28.13	35.12	414.78
Lamprophis_aurora	16.31	13.96	5.53	38.87	27.51	2.34	25.17	19.66	11.73	20.72	10.89	672.61	107.36	12.98	59.38	298.94	46.49	281.05	57.36
Lamprophis_fiskii	15.75	15.93	5.34	48.44	30.79	1.15	29.65	16.87	14.36	21.66	9.27	228.4	35.1	9.07	38.96	89.65	31.33	60.54	46.91
Langaha_madagascariensis	24.73	10.88	6.69	17.7	32.14	15.92	16.21	26.37	22.64	26.54	22.16	1533.98	340.02	23.03	92.23	879.47	87.11	689.49	112.37
Laticauda_colubrina	26.47	7.73	7.62	7.34	31.75	21.38	10.37	26.55	26.04	27.27	25.44	2539.89	376.84	95.8	45.8	1022.82	328.7	605.66	555.51
Laticauda_guineai	25.95	7.57	6.87	10.27	31.68	20.74	10.95	26.01	25.7	27.12	24.48	1868	232.88	76.94	36.82	656.41	281.29	490.35	479.12
Laticauda_laticaudata	25.66	7.61	7.07	13.17	31.63	19.83	11.8	26.3	24.55	27.2	23.88	2445.59	366.76	90.7	47.02	991.28	310.79	612.87	509.1
Laticauda_saintgironsi	22.71	7.28	5.42	21.94	29.08	15.74	13.33	25.44	20.9	25.44	19.81	1600.4	234.18	65.72	43.3	658.96	214.81	658.96	249.54
Leiocephalus_carinatus	25.04	9.94	6.28	19.33	32.53	16.86	15.67	26.72	22.42	27.27	22.31	1297.35	205.39	30.46	58.69	528.3	110.36	466.77	115.03
Leiocephalus_schreibersii	24.94	11.06	7.42	11.45	31.97	17.17	14.8	25.83	23.41	26.22	23.25	1073.71	168.03	26.09	55.59	425.94	90.56	352.38	96.35
Leioheterodon_geayi	24.25	13.84	6.41	27.11	33.59	12.22	21.37	27.12	20.79	27.14	20.36	635.9	162.54	5.25	100.47	416.62	20.26	395.09	26.12
Leioheterodon_madagascariensis	22.64	12.35	6.54	22.17	31.21	12.46	18.75	24.78	19.84	24.9	19.41	1401.26	315.08	18.38	95.19	821.95	69.53	688.74	86.59
Leioheterodon_modestus	24.27	13.38	6.67	22.31	33.17	13.18	19.99	26.41	21.43	26.58	21	1017.68	263.26	6.32	100.72	655.77	24.34	457.62	29.1
Leiosaurus_bellii	9.94	12.6	4.75	50.64	24.06	-2.09	26.15	6.81	12.6	16.29	3.36	191.96	24.89	9.94	27.69	65.62	34.1	38.82	55.13
Leiosaurus_catamarcensis	16.59	14.96	4.92	53.5	31.21	0.96	30.26	22.62	10.01	23.22	9.55	256.26	56.11	3.18	84.48	145.6	12.13	143.04	12.71
Lepidoblepharis_xanthostigma	25.37	9.5	8.1	4.94	31.44	19.75	11.69	25.06	25.41	25.99	24.72	2409.11	362.75	44.98	55.23	944.11	176.61	419	706.3
Lepidophyma_dontomasi	18.1	11.7	7.1	11.56	26.1	9.7	16.4	18.5	17.1	19.5	16.5	1216	242	16	90	681	52	327	69
Lepidophyma_flavimaculatum	24.94	9.11	6.8	12.86	31.79	18.35	13.44	25.46	24.87	26.31	23.07	2467.24	381.26	58.33	53.56	1015.16	210.49	548.59	448.2
Lepidophyma_gaigeae	20.18	14.76	6.18	28.48	31.65	7.94	23.72	22.2	17.37	23.16	16.17	1101.5	256.05	19.8	82.55	569.45	66.7	371.3	72.35
Lepidophyma_lineri	17.73	12.93	7.57	8.18	26.07	9.07	17	18.03	16.67	18.73	16.6	1344.33	276.33	5.67	94.67	752.67	27.67	347.67	36.33
Lepidophyma_lipetzi	23.68	11.42	6.62	17.66	32.16	15.04	17.12	24.68	23.48	25.54	21.18	1491.6	254	30.6	66.4	682.2	107.2	337.4	188.8
Lepidophyma_lowei	19.65	11.65	6.6	16.69	28.45	10.95	17.5	20.4	19.7	21.7	17.35	2797	550.5	56	77.5	1467.5	181	610	280.5
Lepidophyma_mayae	24.93	9.27	6.68	14.59	31.65	17.93	13.72	25.9	24.72	26.44	22.76	3083.04	488.15	87.67	53.96	1283.59	276.07	765.96	417.67
Lepidophyma_micropholis	24.16	11.41	5.16	37.04	34.15	12.25	21.9	27.59	20.2	27.91	18.86	1148.5	227.21	16.5	84.21	613.5	61.43	528.5	67.86
Lepidophyma_occulor	21.54	13.87	5.84	31.87	32.88	9.32	23.55	23.92	18.42	24.84	17.04	1177.48	283.29	20.86	86.52	623.33	69.48	421.81	76.19
Lepidophyma_pajapanensis	23.63	9.35	5.75	20.38	32.01	15.89	16.13	24.78	24.03	25.89	20.75	2723.12	493.62	55.25	67.25	1298.5	189	514.12	361.75
Lepidophyma_radula	17	12.9	6.9	13.63	26.3	7.8	18.5	17.7	15.3	18.7	15.1	925	186	13	87	497	42	286	53
Lepidophyma_reticulatum	23.03	10.52	7.81	6.75	30.17	16.77	13.4	22.68	23.16	23.98	22.21	3091.96	518.61	41.45	63.49	1344.82	158.16	578.45	801.31
Lepidophyma_smithii	25.05	13.05	7.52	9.42	33.42	16.16	17.25	25.34	24.12	26.17	23.77	1651.19	347.5	3.63	98.35	904.58	16.85	352.88	51.07
Lepidophyma_sylvaticum	19.73	14.52	6.05	30.59	31.08	7.29	23.79	22.28	16.42	22.95	15.39	931.58	184.54	20.14	72.44	459.8	70.61	331.4	77.53
Lepidophyma_tuxtlae	22.4	10.22	6.24	17.99	30.58	14.34	16.23	23.54	22.43	24.33	19.87	1925.06	344.88	35.38	73.38	939.69	120.56	403.69	213.81
Leposoma_parietale	26.27	9.21	7.98	6.42	32.37	20.87	11.5	25.75	26.66	26.97	25.33	2864.76	352.91	112.31	32.85	993.49	410.01	472.75	904.92
Leposoma_percarinatum	25.85	10.62	7.81	5.24	32.87	19.1	13.77	25.57	25.82	26.45	25.16	2272.47	341.89	57.98	54.48	947.87	206.08	381.35	606.95
Leptodeira_frenata	25.68	10.92	6.38	19.54	33.99	17.02	16.98	26.93	25.12	27.68	22.86	1468.7	252.24	34.82	61.43	651.34	122.04	388.07	192.59
Leptodeira_maculata	24.07	13.62	6.75	17.2	33.84	13.72	20.12	24.99	23.62	26.15	21.76	1133.86	275.58	3.07	109.17	752.36	15.3	405.11	42.46
Leptodeira_nigrofasciata	25.81	11.91	7.48	8.58	33.83	18.03	15.8	25.75	25.32	26.92	24.71	1742.84	364.53	4.02	94.25	922.66	18.63	306.87	162.02
Leptodeira_punctata	23.1	13.88	6.43	25.15	32.91	11.47	21.45	25.66	21.96	25.85	19.68	1140.55	310.63	3.16	117.24	832.18	16.45	695.61	47.76
Leptodeira_rubricata	26	10.7	7.65	7.26	33.35	19.5	13.85	25.6	26.2	27.1	25.2	3718	674	61.5	60	1599.5	230.5	709	1179
Leptodeira_splendida	22.64	15.36	6.14	31.55	34.48	9.52	24.96	25.69	22.03	26.33	18.38	827.72	207.74	4.15	106.64	548.9	19.19	372.05	63.46
Leptodeira_uribei	26.25	13.09	7.26	15.98	34	16.06	17.94	27.76	25.11	28	24.03	915.75	239.5	2.12	109.25	627.25	13.25	465	30.5
Lerista_allochira	24.13	13.26	5.11	45.1	36.9	11.3	25.6	21.23	24.48	29.71	18.09	261.5	47.4	1.8	73.6	117.7	7.5	101.6	84.9
Lerista_connivens	22.5	13.24	4.86	48.73	36.57	9.62	26.94	17.91	24.06	28.81	16.25	240.49	51.56	1.45	77.77	128.85	10.91	59.97	110.19
Lerista_elongata	20.23	15.05	4.81	57.3	36.02	4.96	31.05	24.97	15.84	27.28	12.62	181.57	25.34	8.74	31.03	64.56	31.75	59.83	36.22
Lerista_kennedyensis	23.6	14.87	4.83	56.14	39.5	9.11	30.39	18.72	23.32	30.65	16.28	212.15	39	2.55	68.75	94.75	10.65	79.85	76.4
Lerista_onsloviana	25.42	14.26	5.17	47.63	38.9	11.53	27.37	30.71	25.11	31.17	18.97	277.41	54.19	1.3	82.26	137.86	5.64	137.76	72.16
Lerista_stylis	27.01	11.36	5.78	24.83	35.83	16.26	19.56	28.61	23.46	29.72	23.29	1107.19	262.28	0.91	109.68	744.08	5.62	408.47	6.88
Lerista_taeniata	22.87	14.96	5.1	48.93	36.82	7.73	29.09	25.27	19.72	28.51	16.11	351.51	75.99	5.8	61.47	196.01	24.96	139.37	27.9
Lerista_vermicularis	26.45	14.84	5.19	48.24	38.97	10.59	28.38	30.98	24.26	31.58	19.57	334.14	93.1	1.64	106.51	227.79	8.11	180.14	17
Lerista_walkeri	27.2	9.81	5.81	21.41	34.32	17.55	16.77	28.44	24.3	29.32	23.88	1286.71	357.42	1.8	118.75	947.08	14.66	284.19	16.58
Letheobia_feae	22.35	6.9	7.05	8.26	27	17.25	9.75	22.75	21.1	23.2	21.1	2125.5	348	9.5	59.5	831.5	75.5	701.5	75.5
Liasis_fuscus	25.94	10.81	6.37	20.45	34.01	16.54	17.48	27.27	23.27	28.11	22.88	1725.63	315.3	47.07	88.9	867.37	160.71	554.64	181.93
Liburnascincus_scirtetis	24.1	8.5	5.9	20.58	31	16.6	14.4	26	23	26.3	21.1	1821	400	22	94	1129	73	926	93
Lichanura_trivirgata	19.38	15.66	4.97	59.55	35.97	4.28	31.69	20.89	22	27.25	12.12	228.03	48.24	1.45	73.63	119.45	9.49	76.53	76.92
Liolaemus_abaucan	15.32	16.02	5.56	45.21	28.44	0	28.44	20.26	11.42	20.76	9.36	104	27.8	1	106.2	71.6	4.2	71.4	5.2
Liolaemus_albiceps	6	17.25	6.35	35.82	18.2	-8.8	27	9.85	2.2	9.85	0.85	117.5	36	0.5	113.5	86.5	2	86.5	3
Liolaemus_andinus	6.26	13.36	6.26	29.21	16.56	-4.62	21.18	9.44	4.12	9.82	2.32	97.8	22	2	77.2	55.6	8.8	53	11.6
Liolaemus_archeforus	5.62	10.25	4.51	45.67	17.19	-5.28	22.46	4.02	10.51	11.14	-0.43	209.5	27.65	6.75	35.25	73.15	29.05	29.45	67.7
Liolaemus_atacamensis	14.84	10.79	5.91	25.53	24.04	5.99	18.05	11.68	18.02	18.09	11.56	46.79	14.72	0	106.51	34.38	0.02	0.03	33.95
Liolaemus_austromendocinus	11.07	16.05	5.2	54.03	27.5	-3.11	30.61	10.18	11.09	17.99	4.14	265.5	34.91	13.43	29.12	96.88	44.8	59.61	82.07
Liolaemus_baguali	5.93	9.92	4.53	43.43	17.31	-4.39	21.7	4.57	9.78	11.2	0.18	239.72	28.33	13.89	23.61	80.39	44.22	47.22	65.44
Liolaemus_bellii	6.91	14.04	5.69	39.72	20.49	-3.92	24.41	2.43	11.78	11.92	1.88	457.88	103.88	3.31	89.88	265.44	16.94	16.94	256.94
Liolaemus_bibronii	9.47	12.02	4.71	49.44	23.24	-1.94	25.17	5.52	13.19	15.69	3.04	198.1	27.08	9.22	32.26	71.95	32.28	34.95	62.51
Liolaemus_bitaeniatus	15.16	13.68	5.2	43.01	27.33	1.2	26.13	19.92	9.87	20.26	9.35	405.19	92.73	3.1	96.9	245.78	11.64	243.49	12.6
Liolaemus_boulengeri	8.95	12.87	4.85	50.22	23.59	-2.7	26.29	3.5	14.38	15.35	2.44	181.89	26.88	7.16	38.51	72.19	25.24	27.84	63.57
Liolaemus_buergeri	5.88	15.04	5.46	46.16	21.35	-5.96	27.31	0.92	11.36	11.84	-0.04	607.98	113.52	15.17	66.23	312.43	51.11	52.33	301.81
Liolaemus_calchaqui	8.25	14	5.6	38.16	20.2	-4.7	24.9	12.75	3.25	12.75	3.05	245.5	56.5	2	97.5	157	8	157	10
Liolaemus_canqueli	10.92	12.38	4.73	50.04	25.27	-0.63	25.9	4.98	15.94	17.31	4.43	175.24	24.5	8.19	35.84	67.6	26.29	28.95	59.21
Liolaemus_capillitas	12.1	14.01	5.27	43.7	24.73	-1.64	26.38	17.15	6.48	17.36	6.25	207.38	49.48	1.9	100.19	133.05	6.95	132.67	9
Liolaemus_ceii	6.88	14.5	5.6	43.79	22.5	-3.08	25.58	1.83	12.45	12.45	1.33	603.5	113.5	12.25	66.75	306.75	52	52	292
Liolaemus_chacoensis	21.15	13.86	5.04	45.63	34.22	6.91	27.31	26.26	15.19	26.64	15	626.18	115.76	5.66	76.61	315.94	23.26	313.12	28.5
Liolaemus_chaltin	11.42	17.62	6.34	33.43	23.48	-4.12	27.6	14.58	6.82	14.67	6.39	293.2	74.52	0.02	111.3	199.57	2.43	166.84	2.71
Liolaemus_chiliensis	11.28	12.57	5.44	37.19	24.87	1.93	22.95	7.1	16.01	16.19	6.61	1101.32	213.27	20.54	80.98	584.17	76.59	77.86	552.24
Liolaemus_coeruleus	6.94	14.54	5.61	43.56	22.63	-3	25.63	1.93	12.51	12.51	1.46	641.14	120	13	67.14	326	54.57	54.57	310
Liolaemus_crepuscularis	13.1	14.1	5.2	46.04	26.1	-1	27.1	17.7	7.2	18.6	6.9	208	50	2	98	131	8	131	10
Liolaemus_curicensis	9.63	14.23	5.3	44.4	25.08	-1.48	26.55	4.6	15.53	15.53	4.03	1031.25	222.5	11.5	88.25	605.25	40.5	40.5	567
Liolaemus_cuyanus	16.65	15.85	4.85	58.28	32.76	0.4	32.36	22.57	9.63	23.94	9.07	212.87	42.19	4.4	70.88	109.75	16.12	107	16.85
Liolaemus_cyanogaster	9.8	10.49	5.25	32.55	21.52	1.82	19.7	6.23	14	14.08	5.73	1735.76	281.04	52.82	57.57	791.33	186.33	189.82	758.01
Liolaemus_darwinii	14.13	14.77	4.87	55.21	30.06	0.06	30	15.98	10.25	21.12	7.02	260.86	36.14	10.82	34.14	94.31	39.59	77.94	46.94
Liolaemus_dicktracyi	11.25	15.13	5.5	44.56	24.8	-2.68	27.48	16.1	5.75	16.95	5.58	199	46.75	1.5	93.25	122.5	10.25	118.25	10.25
Liolaemus_donosobarrosi	12.15	16.37	5.17	56.31	29.13	-2.26	31.39	13.18	9.76	19.36	4.98	183.08	21.72	9.96	24.56	60.4	33.8	44.4	49.04
Liolaemus_dorbignyi	9.6	14.2	5.8	37.21	21.3	-3	24.3	13.5	6.6	14.2	4.7	129	32	1	97	81	7	80	8
Liolaemus_escarchadosi	6.26	10.35	4.75	42.61	17.57	-3.99	21.56	7.59	5.9	11.32	0.51	181.83	20.83	10.5	19.21	55.46	34.6	46.58	45.79
Liolaemus_espinozai	11.2	13.85	5.3	42.53	23.7	-2.25	25.95	16.35	5.75	16.35	5.5	199	47	2	100	128	7	128	9
Liolaemus_famatinae	5.3	14.3	5.9	36.24	17.4	-6.6	24	9.3	0.7	10	0.7	203	43	3	77	111	18	107	18
Liolaemus_fitzingerii	9.5	10.71	4.6	46.66	21.94	-1.09	23.03	4.44	12.73	15.24	3.36	205.74	26.89	10.16	29.51	73.6	34.88	38.39	65.2
Liolaemus_fuscus	13.24	12.49	5.52	36.01	25.98	3.42	22.56	9.14	17.72	17.97	8.69	569.86	134.77	4.78	100.65	349.52	19.08	19.53	328.64
Liolaemus_gallardoi	3.98	9.75	4.58	41.76	14.95	-6.09	21.04	4.49	8.28	9.06	-1.55	306.92	42	14.92	28	102.92	56.38	57	78.38
Liolaemus_gracilis	14.6	15.1	4.89	55.8	30.91	0.4	30.51	17.15	9.7	21.68	7.43	295.87	39.61	11.31	33.53	104.13	41.82	90.92	44.57
Liolaemus_grosseorum	13.58	16.3	5.08	56.96	30.46	-1.3	31.76	16.2	8.99	20.83	6.27	225.9	29.09	10.63	29	76.12	36.46	65.1	43.3
Liolaemus_hatcheri	4.71	9.72	4.55	42.11	15.76	-5.39	21.14	4.81	8.98	9.83	-0.85	303.22	39.65	15.97	26.41	101.3	55.92	57.19	78.73
Liolaemus_heliodermis	8.25	14	5.6	38.16	20.2	-4.7	24.9	12.75	3.25	12.75	3.05	245.5	56.5	2	97.5	157	8	157	10
Liolaemus_hermannunezi	6.4	14.4	5.6	40.92	22.1	-3.2	25.3	1.8	11.8	11.8	1.3	1167	221	21	74	619	83	83	585
Liolaemus_huacahuasicus	10.5	13.7	5.5	38.52	22.3	-2.5	24.8	15	5.4	15	5.3	224	54	1	105	151	5	151	7
Liolaemus_inacayali	9.09	14.28	4.92	54.8	25.08	-3.62	28.71	5.06	13.84	16.05	2.02	199.13	27.47	10.08	31.84	73.18	33.66	37.85	61.27
Liolaemus_irregularis	6.18	17.6	6.35	36.23	18.57	-8.95	27.52	10.02	1.65	10.02	0.95	108.83	35.5	0.17	119.5	82.33	1.5	82.33	2.17
Liolaemus_kingii	9.13	10.96	4.61	47.25	21.81	-1.68	23.49	5.11	12.66	14.97	2.94	198.86	27	9.54	30.67	71.06	33.33	36.63	61.83
Liolaemus_kolengh	2.1	9.4	4.7	39.24	12.55	-7.35	19.9	0.9	6.9	6.9	-3.1	483.5	54	22	26.5	152.5	82	82	150
Liolaemus_kriegi	7.83	13.25	5.16	46.97	22.66	-2.79	25.46	2.44	13.26	13.86	1.85	484.21	89.74	12.58	62.35	239.11	47.31	48.48	223.2
Liolaemus_laurenti	17.23	15.77	4.84	58.01	32.95	0.64	32.31	23.95	9.98	24.5	9.69	199.62	46.04	2.19	89.42	118.73	8.88	117.42	9.15
Liolaemus_lavillai	9.75	15.83	6.05	36.22	21.35	-4.58	25.93	13.75	4.9	13.75	4.68	166	47.25	0.25	112.25	121.75	1.5	121.75	3.25
Liolaemus_lemniscatus	11.32	12.79	5.41	38.19	25.31	1.87	23.44	7.03	16.2	16.37	6.52	1096.34	216.69	19.22	81.02	591.74	72.25	73.54	556.86
Liolaemus_leopardinus	4	13.94	5.7	39.6	17.4	-6.82	24.22	-0.5	8.98	8.98	-1.02	440.2	100.2	4.2	87.4	248.2	19.6	19.6	237.2
Liolaemus_lineomaculatus	7.65	10.53	4.63	45.1	19.64	-2.86	22.5	5.02	10.18	13.15	1.71	264.1	35.2	13.09	27.65	93.71	45.06	50.44	81.84
Liolaemus_magellanicus	5.74	8.84	4.78	35.11	15.67	-2.63	18.3	6.74	5.48	10.05	1.06	348.49	38.26	21.1	17.67	105.3	69.29	90.02	84.96
Liolaemus_molinai	3	17.75	6.65	32.77	15	-11.55	26.55	6.45	0.75	6.45	-1.8	58.5	24.5	0	136.5	47.5	0	47.5	1.5
Liolaemus_morenoi	9.8	13.2	5.2	46.28	24.5	-0.6	25.1	4.6	15.7	15.7	3.9	491	98	12	70	259	44	44	236
Liolaemus_multicolor	7.99	18.85	6.26	39.7	21.33	-8.59	29.92	12.02	2.57	12.02	2.2	167.45	49.51	0.01	118.15	122.23	1.22	120.36	2.06
Liolaemus_multimaculatus	14.14	11.4	4.57	46.76	28	3.32	24.68	17.56	10.46	20.1	8.29	663.93	79.36	33.57	22.5	207.64	124.71	184.64	128.71
Liolaemus_nigromaculatus	15.02	11.09	5.91	26.49	24.53	5.98	18.55	12.74	18.13	18.39	11.58	69.87	19.65	0.04	90.67	48.01	0.44	0.74	47.33
Liolaemus_nigroviridis	9.84	14.14	5.62	40.05	23.85	-1.1	24.94	5.23	14.8	14.97	4.7	529.61	124.76	3.1	97.27	328.34	14.05	14.56	312.27
Liolaemus_nitidus	12.68	12.51	5.58	35.32	25.14	2.83	22.31	8.66	17.02	17.3	8.21	486.5	117.87	3.49	101.51	302.45	14.45	14.79	285.72
Liolaemus_olongasta	16.28	16	4.88	58.02	32.15	-0.33	32.48	22.73	9.32	23.62	8.77	149.78	33.69	2.56	79.45	83.45	10.18	82.42	11.39
Liolaemus_orientalis	8.06	19.54	6.24	40.38	21.77	-9.26	31.03	12.09	2.44	12.09	2.2	278.86	71.71	0	110	191.14	3.29	191.14	3.86
Liolaemus_ornatus	7.05	17.77	6.61	31.74	18.78	-7.98	26.77	10.23	3.62	10.27	2.27	210.15	67.54	0.5	135.9	156.38	2.55	152.72	3.02
Liolaemus_pagaburoi	12	13.3	5.33	39.6	23.78	-0.93	24.71	16.71	6.84	16.71	6.68	238.96	57.3	1.17	103.3	158	5.48	158	7.48
Liolaemus_petrophilus	10.01	13.43	4.83	52.63	25.18	-2.33	27.5	6.24	13.15	16.71	3.21	179.91	22.94	9.31	27.77	61.64	31.49	35.56	52.43
Liolaemus_pictus	9.38	10.63	5.23	33.59	21.26	1.23	20.02	5.65	13.69	13.78	5.17	1636.3	265.58	50.09	57.2	743.08	177.84	180.89	713.79
Liolaemus_platei	13.67	10.87	5.81	27.03	23.28	4.77	18.51	10.45	17.04	17.16	10.25	82.81	24.02	0.05	109.84	58	0.51	0.55	57.19
Liolaemus_pseudoanomalus	16.41	16.04	5.18	52.39	30.87	0.1	30.77	21.95	10.15	22.81	9.51	217.99	52.1	2.66	96.69	135.51	10.56	130.29	10.99
Liolaemus_pseudolemniscatus	13.29	12.31	5.75	32.41	24.63	3.49	21.14	9.37	17.23	17.47	9.19	217.94	57.24	0.4	109.79	143.44	3.08	3.15	142.4
Liolaemus_puna	8.11	17.53	6.53	31.6	19.85	-6.86	26.71	11.25	4.41	11.3	3.39	239.48	67.3	0.84	127.21	164.42	4.35	148.3	4.86
Liolaemus_quilmes	10.54	13.97	5.58	38.29	22.27	-2.59	24.86	15.04	5.62	15.04	5.34	167.88	42.35	0.81	106.65	116.04	3.27	116.04	5.58
Liolaemus_ramirezae	10.56	15.01	5.76	38.01	22.39	-3.4	25.79	14.89	5.52	14.89	5.31	183.47	48.82	0.49	111.22	129.98	2.45	129.98	4.31
Liolaemus_riojanus	16.64	15.52	4.74	59.16	32.55	0.14	32.42	23.58	9.32	24.1	8.93	184.22	41.24	2.14	82.35	103.76	9.22	103.57	9.76
Liolaemus_robertmertensi	16.2	15.51	5.15	51.15	30.22	0.28	29.94	21.63	10	22.34	9.39	223.89	52.98	3.24	95.43	137.98	11.57	132	12.56
Liolaemus_rothi	8.97	14.13	5.12	50.94	24.57	-2.77	27.34	3.1	14.69	15.48	2.47	298.16	53.95	9.4	55.55	144.61	32.14	34.03	129.08
Liolaemus_ruibali	5.64	14.36	5.56	42.3	19.16	-6.51	25.66	4.17	6.69	11.12	0.27	198.8	34.24	8.27	42.2	80.1	30.22	40.29	66.8
Liolaemus_sarmientoi	6.58	10.06	4.82	40.71	17.57	-3.15	20.71	8.43	5.45	11.43	1.1	188.97	22.08	10.43	19.43	57.34	35.01	54.31	44.25
Liolaemus_saxatilis	15.37	14.1	4.99	48.32	29.45	1.5	27.95	21.28	8.93	21.51	8.93	623	106.02	9.73	68	292.31	31.27	290.49	31.27
Liolaemus_scapularis	11.47	13.77	5.41	40.29	23.48	-1.77	25.25	16.27	6.24	16.27	6.04	181.22	44.96	1.04	105	123.04	3.96	123.04	6.3
Liolaemus_schroederi	11.58	13.31	5.34	40.58	26.21	1.5	24.71	7.07	16.77	16.99	6.48	1042.65	221.34	13.69	87.51	599.84	51.87	52.72	556.48
Liolaemus_silvanae	4.46	10.2	4.55	44.64	15.88	-6.26	22.14	3.08	9.29	9.85	-1.47	240.37	30.63	8.16	33.26	81.11	35.37	35.63	75.95
Liolaemus_somuncurae	9.28	14.36	4.91	54.64	25.16	-3.8	28.96	11.29	4.71	16.24	2.28	199.32	24.5	11.14	21.55	61.32	39.86	45.27	48.55
Liolaemus_stolzmanni	9.84	15.38	7.5	14.13	19.09	-1.47	20.56	11.02	8.17	11.3	7.72	744.68	139.02	12.36	91.33	376.5	45.6	308.82	46.64
Liolaemus_tari	5.04	9.68	4.6	41.56	16.12	-4.78	20.9	3.12	9.42	10.12	-0.44	321.4	37.6	18.6	23.6	107.6	59	63	89.2
Liolaemus_telsen	9.52	14.18	4.88	54.54	25.28	-3.47	28.75	9.71	10.12	16.46	2.51	187.99	21.4	10.78	19.42	55.88	37.96	43.02	45.86
Liolaemus_tenuis	11.94	12.8	5.43	38.02	25.82	2.4	23.42	7.69	16.77	16.97	7.17	1014.72	204.8	16.45	84.21	558.57	61.91	63.17	523.62
Liolaemus_tristis	8.3	10.8	4.5	49.42	20.8	-3.1	23.9	8.4	13.5	14.4	1.9	163	26	7	36	58	25	27	44
Liolaemus_umbrifer	7.42	14.14	5.91	34.62	18.76	-4.95	23.71	11.48	4.28	11.53	2.7	123.4	30.2	1.3	97.2	80.1	5.1	80.1	7.3
Liolaemus_uptoni	7.6	13.98	4.9	53.74	23.2	-5	28.2	1.2	13.33	14.43	0.65	173	19.75	8.25	23.25	54.75	30.25	35.75	48.75
Liolaemus_uspallatensis	7.35	14.53	5.44	44.56	21.32	-5.24	26.56	7.26	7.18	13.14	1.69	196.35	31.68	8.31	39.34	76.08	31.44	47.76	57.47
Liolaemus_vallecurensis	8.4	13.95	5.63	40.22	21.2	-3.69	24.89	8.16	8.49	13.57	3.28	163.33	33.95	3.95	70.88	84.07	14.44	33.3	64.12
Liolaemus_wiegmannii	15.5	14.07	4.77	52.93	31.12	1.98	29.13	20.32	9.07	22.27	8.71	597.15	81.25	20.4	43.18	217.28	71.06	202.15	72.48
Liolaemus_xanthoviridis	11.94	11.47	4.7	47.33	24.98	0.75	24.23	7.82	11.61	17.87	5.78	183	25.91	9.43	33.13	67.78	30.83	36.43	56.04
Liolaemus_yanalcu	6.55	17.39	6.29	36.59	18.86	-8.55	27.41	10.44	1.77	10.44	1.3	130.43	39.5	0.21	115.93	96.14	1.5	96.14	2.79
Liolaemus_zapallarensis	14.88	10.3	5.6	28.23	24.44	6.29	18.15	11.55	18.39	18.54	11.32	180.52	49.45	0	113.1	122.9	0.62	0.66	121.62
Liolaemus_zullyae	4.95	9.34	4.52	41.08	15.59	-4.8	20.39	2.47	9.96	9.96	-0.5	367.45	43.09	15.82	32	123	56.09	56.09	120.45
Liophidium_chabaudi	24.8	12.54	6.28	25.4	33.12	13.31	19.81	27.52	21.26	27.56	21.21	603.95	187.57	1.24	122.19	445.81	6.24	436.76	6.33
Liophidium_rhodogaster	20.06	10.92	6.41	24.45	28.08	11.16	16.92	22.67	17.5	22.7	16.62	1660.68	320.72	36.76	77.72	879.87	136.91	864.93	162.28
Liophidium_therezieni	25.77	10.19	7	12.2	32.39	17.93	14.46	26.62	24.1	26.86	23.92	1510.81	403.07	8.93	109.89	1002.44	34.44	654.33	38
Liophidium_torquatum	23.16	12.75	6.59	20.92	31.78	12.53	19.25	25.04	20.18	25.21	20.03	1263.15	321.98	7.91	106.18	812.86	29.39	609.43	31.32
Liophidium_vaillanti	23.96	13.28	6.57	23.09	33.08	13	20.08	26.21	20.99	26.42	20.61	928.71	240.22	6.69	99.38	601.3	25.31	422.54	32.44
Liopholidophis_dimorphus	23.55	9.53	7.23	12.87	29.5	16.45	13.05	24.68	22.2	24.73	21.68	1419.25	349	13.5	102.5	899	56.25	829.25	62.25
Liopholidophis_dolicocercus	19.75	11.01	6.5	24.03	27.84	11.03	16.81	22.3	17.2	22.33	16.39	1672.71	322.76	34.53	78.85	885.14	130.26	871.91	158.69
Liopholidophis_sexlineatus	19.08	11.81	6.44	24.32	27.49	9.3	18.19	21.59	16.02	21.61	15.56	1423.24	298.31	23.54	86.5	803.86	81.18	789.33	89.93
Liopholis_inornata	20.61	14.7	4.68	58.73	36.27	5.12	31.15	24.55	17.06	27.79	12.78	226.87	32.92	9.12	37.28	85.53	33.99	73.55	49.14
Liopholis_striata	23.87	15.02	4.82	56.59	38.32	7.39	30.93	29.6	19.44	30.29	16.04	274.79	57.92	4.89	68.64	144.06	19.35	131.14	28.53
Liopholis_whitii	15.37	12.41	4.91	45.01	28.47	3.39	25.08	15.48	15.83	20.99	9.47	760.71	97.3	35.57	29.9	266.68	122.29	204.18	184.01
Lioscincus_maruia	21.15	7.2	5.4	22.25	27.6	14.3	13.3	23.95	18.95	23.95	18.2	1451.5	227.5	61	46.5	636	192.5	636	216.5
Lioscincus_nigrofasciolatum	21.92	7.3	5.38	22.38	28.39	14.95	13.44	24.71	20.1	24.71	18.95	1621	239.09	66.92	44.06	679.38	216.63	679.38	248.95
Lioscincus_novaecaledoniae	21.95	7.23	5.42	21.83	28.3	15.08	13.23	24.68	19.78	24.68	19.06	1545.39	241.25	60.67	48.89	689.06	195.81	689.06	220.33
Lioscincus_steindachneri	20.93	7.17	5.4	21.68	27.33	14.17	13.17	23.67	18.77	23.67	18.07	1729.33	270.67	64	51	784	212.33	784	239.33
Lioscincus_tillieri	21.47	7.19	5.2	23.99	28.17	14.48	13.69	24.47	20.54	24.47	18.28	1723.33	227	78.22	34.67	634	250	634	298.89
Lioscincus_vivae	22.13	7.1	5.45	21.57	28.33	15.33	13	24.8	19.95	24.8	19.25	1507.5	235.25	62.25	48.25	671.25	193	671.25	216
Lipinia_pulchella	25.19	8.65	7.81	6.48	30.94	19.9	11.04	24.97	25.03	25.95	24.3	2659.85	391.85	94.31	43.99	1052.2	318.97	589.38	585.93
Lophognathus_gilberti	24.72	14.99	5.05	50.96	38.07	8.6	29.47	29.78	18.39	30.38	17.52	376.51	91.72	3.69	90.97	231.79	17.55	201.42	18.96
Loxocemus_bicolor	25.17	12.29	7.39	9.69	33.5	16.96	16.55	25.25	24.49	26.38	23.89	1632.91	342.08	5.03	94.45	875.76	21.1	313.09	155.05
Lucasium_byrnei	20.48	14.51	4.61	60.05	36.25	5.11	31.14	26.57	15	27.95	12.55	190.92	27.03	9.38	33.09	68.34	34.26	63.93	37.9
Luperosaurus_cumingii	25.28	8.39	6.61	11.71	31.66	19.01	12.65	25.15	24.39	26.66	23.59	2572.65	476.13	47.76	66.41	1229.17	176.87	590.97	337.43
Luperosaurus_iskandari	25.5	8.32	8.32	3.37	30.72	20.75	9.97	25.53	25.35	25.82	25.05	1388	171.5	50.17	32.5	487.67	201.17	255.67	411.33
Luperosaurus_joloensis	26.3	8.48	9.05	3.24	31.2	21.88	9.33	26.53	25.8	26.53	25.8	2027.75	241	96.25	30	662.5	302	639.5	324.25
Luperosaurus_macgregori	25.57	7.11	5.56	18.51	31.69	19.04	12.64	24.66	26.04	27.57	22.86	2881.57	408.86	63.43	48.86	1166.14	265.14	544.29	724.57
Lycodon_capucinus	24.26	9.18	6.45	19.09	31.7	15.93	15.78	25.35	22.22	26.36	21.53	2125.79	342.24	60.54	60.25	922.02	210.03	590.8	347.09
Lycodon_laoensis	22.86	10.1	5.35	26.25	31.39	12.27	19.12	24.76	19.54	25.75	19.09	1578.34	323.44	10.85	82.72	847.3	50.45	541.63	91.12
Lycodon_osmanhilli	26.95	7.49	6.7	8.16	32.56	21.39	11.17	26.41	26.88	27.89	25.81	2416.6	370.52	74.95	49.95	909.29	300.17	671.76	575.43
Lycodon_paucifasciatus	24.42	7.47	4.39	33.1	32.7	15.88	16.82	24.75	21.85	28.32	19.86	2313.68	498.89	44.75	78	1280.75	161.32	520.39	294.46
Lycodon_ruhstrati	17.73	7.89	2.93	67.71	30.99	3.86	27.13	23.41	9.79	25.93	8.56	1462.34	254.7	31.14	63.31	688.26	113.32	607.78	132.34
Lycodon_zawi	21.32	9.25	4.65	30.06	29.55	9.87	19.68	23.56	17.44	24.27	16.71	2612.91	593.13	5	93.89	1584.25	34.12	1053.32	36.94
Lycodonomorphus_inornatus	17.16	12.86	5.72	32.93	26.86	4.52	22.34	19.48	13.67	20.85	12.55	777.2	123.95	15.29	60.24	347.92	53.92	321.8	73.39
Lycodonomorphus_whytii	20.36	9.66	6.05	16.11	28.06	12.31	15.75	21.13	18.59	22.08	17.94	1395.27	305.54	5.32	94.95	785.22	24.8	365.41	34.2
Lycodryas_citrinus	26.04	12.61	6.41	20.2	34.2	14.67	19.53	27.73	22.97	27.87	22.93	1089.26	320.05	1.89	117.79	765.42	9.11	530.47	9.11
Lycodryas_granuliceps	25.79	10	7.01	12.26	32.18	18.02	14.16	26.68	24.08	26.86	23.94	1642.15	416.85	12.06	104.92	1056	44.15	700.98	47.04
Lycodryas_inopinae	26.08	8.18	6.85	12.09	31.75	19.88	11.88	27.15	24.78	27.25	24.28	1198.5	320.25	12.5	107	789.25	52.75	781.5	58.5
Lycodryas_inornatus	24.2	12.6	6.25	27.08	33.1	13.09	20.01	27.28	20.77	27.28	20.45	471.57	115.58	4.32	97.89	306.92	18.42	297.42	22.09
Lycodryas_pseudogranuliceps	25.81	11.92	6.65	17.53	33.49	15.65	17.84	27.21	23.27	27.46	23.16	1252.62	365.42	2.67	117.85	876.62	11.88	549.63	13.09
Lycognathophis_seychellensis	25.87	4.18	6.63	6.07	29.47	23.22	6.24	25.84	25.3	26.66	25.1	2204.11	372.11	67.44	48.22	940.22	229.67	530.56	285.56
Lycophidion_nigromaculatum	25.97	9.37	7.28	9.54	32.84	20.05	12.79	25.91	26.28	27.11	24.64	1735.31	311.67	32.55	56.74	708.85	156.47	360.86	468.38
Lycophidion_ornatum	23.04	11.9	8.05	5.53	30.31	15.54	14.77	22.9	22.73	23.65	22.3	1444.28	203.14	25.8	51.87	548.18	112.68	372.27	205.62
Lygisaurus_sesbrauna	25.78	8.84	6.29	16.05	32.56	18.55	14.01	27	24.32	27.54	23.42	1595.48	367.8	6.58	106.31	1050.55	23.89	608.43	41.89
Lygodactylus_arnoulti	19.69	13.01	6.44	24.03	28.94	8.86	20.08	21.98	16.1	22.03	16.1	1309.25	316.62	8.75	103.5	836.5	28.75	750.5	28.75
Lygodactylus_blancae	19.1	13.3	6.9	19.26	27.7	8.5	19.2	20.9	16.3	21	16.3	1650	367	7	101	995	22	968	22
Lygodactylus_chobiensis	22.08	14.49	5.55	30.67	33.94	8.01	25.93	24.04	17.78	25.21	17.58	768.82	193.62	0.13	114.36	540.48	1.25	255.15	2.85
Lygodactylus_expectatus	26.1	9.7	6.9	11.92	32.4	18.5	13.9	26.9	24.4	27.1	24.3	1629	416	14	108	1069	49	756	54
Lygodactylus_gravis	21.18	10.86	6.55	17.75	29.9	13.46	16.44	22.1	19.04	23.28	18.77	890.62	162.95	20.81	65.57	400.14	73.76	245.43	79.48
Lygodactylus_guibei	20.29	10.52	6.36	24.98	28.09	11.7	16.39	23	17.76	23.01	16.76	1858.25	335.12	46.38	70.31	951.19	175.38	946.44	208.62
Lygodactylus_heterurus	24.97	9.22	6.83	14.68	31.19	17.78	13.41	26.36	23.52	26.45	22.84	1581.37	313.73	34.32	78.1	835.23	129.43	711.18	160.67
Lygodactylus_madagascariensis	23.11	10.73	7.07	15.08	30	14.93	15.07	24.46	21.07	24.53	20.91	1635.82	369.55	19.22	94.1	982.49	70.98	820.96	74.24
Lygodactylus_miops	20.48	10.78	6.39	24.14	28.43	11.69	16.73	23.07	18.02	23.1	17.1	1716.85	323.28	39.53	75.27	889.91	147.77	871.39	183.08
Lygodactylus_mirabilis	15.4	12.18	6.7	23.47	23.5	5.4	18.1	17.78	12	17.78	12	1485.5	313.25	14.25	91	846	45.5	819	45.5
Lygodactylus_montanus	18.57	11.17	6.43	24.35	26.67	9.43	17.23	21.27	15.7	21.27	15.1	1144.33	216	31	72	601	102	601	113.33
Lygodactylus_pauliani	17.1	12	6.3	24.86	26	7.2	18.8	19.6	13.5	19.6	13.5	1295	285	16	94	771	50	771	50
Lygodactylus_picturatus	26.24	10.51	7.14	12.51	33.67	19.2	14.47	26.51	25.9	27.7	24.49	723.14	161.27	11.17	78.31	332.89	59.48	165.73	104.12
Lygodactylus_pictus	18.86	11.06	6.19	25.45	27.16	9.43	17.73	21.49	15.87	21.52	15.18	1425.71	301.89	28.23	86.16	798.97	95.13	779.79	107.79
Lygodactylus_rarus	26.1	9.7	6.9	11.92	32.4	18.5	13.9	26.9	24.4	27.1	24.3	1629	416	14	108	1069	49	756	54
Lygodactylus_tolampyae	25.68	11.84	6.62	18.16	33.35	15.52	17.83	27.2	23.06	27.43	22.96	1175.59	345.76	2	118.49	831.1	9.53	536.98	9.78
Lygodactylus_tuberosus	23.93	13.89	6.41	28.22	33.47	12.03	21.44	27.01	20.52	27.01	19.93	544.2	126.32	6.31	92.4	338.08	24.35	333.25	32.01
Lygodactylus_verticillatus	23.84	14.24	6.46	27.94	33.56	11.74	21.82	26.85	20.42	26.86	19.85	579.08	136.16	6.21	93.82	362.64	23.86	350.69	30.91
Lygodactylus_williamsi	24.23	10.2	6.6	17.69	31.2	15.83	15.37	25.33	21.63	26.1	21.63	1490.33	309.33	28.33	67.33	691.33	95	471.33	95
Lygophis_elegantissimus	13.48	12.92	4.59	52.35	29.62	1.72	27.91	19.36	7.03	20.34	7.03	747.52	100.81	25.48	34.7	247.22	98.19	231.33	98.19
Lygosoma_koratense	25.37	11.02	5.73	19.65	33.57	14.53	19.03	25.7	22.75	27.3	22.27	1173.83	266.17	6	74.17	552.33	39.17	346.83	45
Lyriocephalus_scutatus	24.82	7.86	7.04	6.64	30.63	19.52	11.12	24.62	24.59	25.68	23.93	2979.39	403.02	109.37	37.2	1037.27	409.44	815.68	672.07
Lytorhynchus_diadema	24.65	15	4.75	58.66	40.14	8.38	31.76	23.67	25.27	31.58	16.62	83.69	27.7	0.1	98.12	59.52	0.94	13	15.24
Macropisthodon_rudis	16.89	8.61	3.24	63.96	29.55	2.83	26.73	22.26	9.42	24.54	8.18	1408.19	249.84	30.48	66.13	673.14	109.99	600.17	129.37
Macroprotodon_abubakeri	16.64	8.73	3.28	60.46	31.14	4.9	26.24	10.67	24.55	24.86	9.43	424.61	64.22	2.41	57.02	179.65	19.55	25.79	169.35
Macroprotodon_cucullatus	17.46	12.05	4.09	60.49	33.16	3.86	29.29	12.63	25.07	25.22	9.8	262.29	41.8	3.03	62.97	111.34	17.87	21.72	103.45
Macrovipera_schweizeri	18	5.8	2.9	51.97	28.6	8.9	19.7	13.4	24.8	24.8	11.7	420	86	0	83	228	2	2	176
Madagascarophis_colubrinus	23.86	12.02	6.54	20.9	32.08	13.84	18.24	25.83	21.33	25.99	20.81	1485.66	330.65	21.73	93.15	858.28	83.4	671.94	107.27
Madagascarophis_meridionalis	23.24	13.77	6.42	25.82	32.71	11.45	21.26	25.83	19.73	25.88	19.46	846.36	216.74	6	103.57	553.91	21.77	485.84	24.42
Madascincus_igneocaudatus	22.76	12.93	6.35	27.3	31.81	11.61	20.2	25.76	19.35	25.77	18.92	675.03	150.51	8.21	90.03	404.74	29.48	399	37.66
Madascincus_melanopleura	20.81	10.69	6.55	22.12	28.52	12.32	16.2	23.14	18.49	23.17	17.69	1702.54	318.46	38.08	75.08	880.91	141.27	855.96	172.68
Madascincus_mouroundavae	21.45	11.28	6.85	20.02	29.3	12.95	16.35	23.45	19.02	23.48	18.61	1561.88	336.02	23.61	89.41	902.39	91.45	862.09	100.82
Madascincus_nanus	21.96	9.61	6.49	20.8	29.2	14.58	14.62	24.2	20.35	24.28	19.02	2174.85	333.8	61.41	54.09	945.28	233.26	938.54	326.87
Madascincus_polleni	25.34	12.43	6.66	19.37	33.39	14.75	18.64	27.03	22.57	27.22	22.45	1142.87	320.94	4.3	114.85	785.67	17.37	544.95	18.01
Madascincus_stumpffi	25.36	9.46	6.94	12.91	31.49	17.96	13.53	26.41	23.74	26.54	23.45	1655.76	400.06	18.38	100	1029.68	67.68	769.82	75.56
Malpolon_monspessulanus	14.74	11.25	3.9	59.37	30.85	2.26	28.59	11.22	21.65	22.67	7.49	499.86	69.13	10.2	46.48	187.72	48.34	53.63	167.45
Manolepis_putnami	24.96	13.2	7.17	14.02	33.58	15.23	18.34	25.97	24	26.53	23.02	1250.69	309.53	2.88	109.74	818.05	14.11	480.71	34.71
Maracaiba_meridensis	9	11.07	7.8	4.23	15.37	1.27	14.1	9.27	8.47	9.3	8.37	1032.67	143.33	17.33	53	391.33	67.33	371.67	72
Marisora_falconensis	27.69	10.79	8.03	5.17	34.39	21.01	13.38	27.46	27.42	28.26	26.96	1173.48	200.28	11.65	64.71	501.8	51.99	262.63	270.09
Marisora_unimarginata	24.97	9	7.67	5.91	31.19	19.48	11.71	24.56	25.11	25.78	24.25	2605.41	426.1	32.79	61.92	1097.3	133.28	416.93	783.13
Marmorosphax_montana	20.2	7.3	5.2	24.28	27.1	13.2	13.9	23.28	19.28	23.28	16.98	1889.75	248	88	34.5	708.25	279.25	708.25	327
Marmorosphax_tricolor	21.57	7.3	5.36	22.68	28.11	14.61	13.5	24.41	19.76	24.41	18.57	1646.26	243.02	69.17	43.98	693.62	220.57	693.62	251.85
Mastigodryas_melanolomus	24.71	11.37	6.65	17.16	32.96	15.96	17	25.79	23.93	26.55	22.27	1589.78	295.88	27.55	75.41	770.69	97.92	445.72	177.26
Matoatoa_brevipes	24.04	12.73	6.25	27.4	33.06	12.9	20.16	27.15	20.62	27.15	20.24	466.42	110.51	5.02	94.04	295.77	20.75	287.4	25.23
Mediodactylus_heterocercus	14.54	12.46	3.21	91.45	35.69	-2.45	38.14	5.05	26.08	26.22	2.85	568.15	97.06	1.07	75.83	269.67	5.58	7.81	250.8
Mediodactylus_heteropholis	19.18	15.08	3.75	88.2	40.85	1.21	39.64	8.97	30.33	30.33	7.79	424.4	85.6	0	91.47	234.4	0	0	215.07
Mediodactylus_kotschyi	12.85	10.83	3.53	69.27	29.39	-0.86	30.24	6.82	20.88	21.65	3.99	628.02	102.67	12.86	54.34	273.43	49.7	59.26	258.63
Mediodactylus_russowii	11.51	12.24	2.76	112.57	34.53	-9.38	43.91	10.12	22.47	25.67	-3.28	186.21	29.24	3.79	52.1	75.57	15.34	20.73	55.64
Mediodactylus_sagittifer	26.15	14.58	4.2	72.53	42.88	8.58	34.3	16.45	34.2	35.28	16.45	108	31.75	0	118.5	81.75	1	1	81.75
Mediodactylus_spinicauda	15.49	12.65	3.32	91	35.36	-2.26	37.62	9.71	26.63	27.08	3.77	229.19	41.2	2.58	65.23	105.31	10.52	12.09	81.16
Melanophidium_punctatum	23.75	8.13	6.26	11.85	30.4	17.4	13	23.47	23.46	25.46	22.37	2225.57	580.9	20	80.9	1291.86	87.29	289.62	414.43
Melanoseps_ater	20.77	11.04	6.34	15.1	28.92	11.6	17.32	21.49	18.93	22.36	18.54	1173.44	243.2	2.56	95.84	665.84	12.19	275.09	21.3
Mesalina_adramitana	25	12.88	4.69	52.69	38.26	10.8	27.47	21.94	29.66	31.12	17.79	76.31	20.25	0.07	95.93	44.17	1.9	4.39	27.8
Mesalina_bahaeldini	16.53	11.64	4.32	54.93	29.7	3.07	26.63	9.99	22.4	23.11	9.09	27.57	5.17	0	72	13.8	0	0	13.46
Mesalina_balfouri	25.48	7.77	5.53	19.27	33.06	19.08	13.98	23.44	27.83	27.83	23.16	95.1	21	2.1	61.4	43.3	9.8	9.8	26.1
Mesalina_brevirostris	22.5	14.16	4.08	73.92	39.62	5.26	34.37	16.77	27.52	31.37	12.51	140.98	32.2	0.8	87.64	77.49	4.02	23.57	61.13
Mesaspis_gadovii	17.44	14.98	7.18	12.11	27.62	6.97	20.65	17.85	16.44	18.96	15.79	1168.05	251.59	7.05	95.59	681.59	33.5	333.91	42
Mesaspis_moreletii	21.23	11.16	6.97	12.35	29.3	13.38	15.91	21.78	20.61	22.62	19.44	1628.34	281.18	25.13	69.92	723.2	91.33	443.66	144.1
Mesoscincus_managuae	25.38	11.61	7.45	8.39	33.51	18.04	15.46	25.11	25.1	26.54	24.37	1662.32	355.16	3.44	92.96	880.87	15.64	260.09	260.22
Mesoscincus_schwartzei	25.61	10.95	6.43	19.14	33.81	16.93	16.87	26.86	24.98	27.57	22.84	1361.3	228.24	32.91	59.94	587.96	114.27	378.17	170.84
Micrelaps_bicoloratus	23.41	10.93	7.07	13.83	31.38	16.08	15.3	23.93	22.17	24.98	21.44	730.89	156.93	9.88	75.15	331.7	43.55	211	68.8
Microgecko_helenae	17.07	15.09	3.8	84.88	38.19	-0.96	39.15	7.3	27.4	27.79	6.04	344.51	72.04	0.06	92.37	186.45	1.18	1.64	175.82
Microlophus_albemarlensis	22.26	6.83	5.89	15.1	28.96	17.44	11.51	24.17	21.15	24.38	20.44	715.57	104.36	38.64	39.07	269.36	125.36	259.57	144.71
Microlophus_atacamensis	16.85	8.56	5.36	24.76	25.01	9.24	15.77	13.93	20.06	20.06	13.7	17.4	6.2	0	74.2	13.8	0	0	13.8
Microlophus_duncanensis	23.45	6.9	5.75	16.36	30.3	18.45	11.85	25.3	22.25	25.65	21.45	433.5	71.5	17.5	54.5	199.5	57	193	63.5
Microlophus_grayii	22.5	6.2	5.2	17.89	29.4	17.7	11.7	24.9	20.5	24.9	20.3	458	91	16	61	221	55	221	60
Microlophus_habelii	23.88	7.5	6.4	13.81	30.25	18.65	11.6	25.55	22.9	25.75	22.25	606.25	81.5	28.25	37.25	239.75	94.5	214.75	118.75
Microlophus_occipitalis	23.25	10.49	6.82	17.78	31.33	15.96	15.37	25.52	21.71	25.59	21.16	249.32	74.04	2.33	142.31	166.66	9.22	159.9	10.25
Microlophus_pacificus	23.4	7.4	6.4	13.26	29.8	18.4	11.4	25	22.5	25.2	21.9	793	94	43	25	270	141	242	185
Microlophus_peruvianus	21.63	10.45	6.36	21.11	30.24	13.89	16.36	23.91	21.04	24.45	19.14	109.78	34.63	0.74	109.79	78.04	3.05	75.41	4.16
Microlophus_stolzmanni	17.41	12.87	8.39	5.6	24.71	9.41	15.29	17.68	16.59	17.97	16.55	898.88	131.1	27.41	44.94	341.9	95.39	262.29	101.65
Microlophus_theresiae	18.93	10.17	5.82	25.06	28.05	10.81	17.24	20.07	20.26	22.33	15.95	11	2.68	0	52.76	6.47	0.66	4.79	3.45
Microlophus_theresioides	13.79	12.94	6.17	28.06	23.86	3.16	20.71	17.13	13.13	17.15	9.89	13.54	7.63	0	112.03	11.59	0	11.42	0
Microlophus_thoracicus	19.66	10.55	6.31	21.48	28.38	11.79	16.58	21.94	19.36	22.55	17.11	26.84	12.04	0.01	95.16	21.58	0.27	20.81	1.24
Microlophus_tigris	13.31	14.23	7.31	16.38	22.28	3.02	19.26	14.97	11.85	15.32	11.1	291.2	84.45	0.79	122.72	217.64	3.9	217.45	4.34
Microlophus_yanezi	17.2	10.4	5.8	24.81	26.33	8.6	17.73	16.33	18.7	20.43	14.07	5.33	1.33	0	53.33	3	0	1.67	2.67
Micropisthodon_ochraceus	22.31	9.47	6.13	23.09	29.54	14.26	15.28	24.91	20.52	24.94	19.15	2248.25	360.62	65.53	54.89	1008.72	254.89	992.02	351.4
Micruroides_euryxanthus	19.82	16.78	5.06	61.46	36.49	3.36	33.13	26.75	21.42	27.61	12.07	423.39	102.97	4.33	82.19	245.84	21.43	214.56	81.19
Micrurus_baliocoryphus	21.4	11.76	5.11	39.4	33.26	10.35	22.92	24.65	16.51	26.37	16.35	1238.57	152.66	48.87	32.51	408.04	175.03	366.97	179.61
Micrurus_diastema	25.26	10.68	6.37	19.06	33.48	16.84	16.65	26.47	24.76	27.24	22.51	1757.93	301.38	41.58	61.85	787.8	143.91	441.95	225.96
Micrurus_dissoleucus	25.85	9.88	7.87	5.69	32.24	19.72	12.52	25.59	25.69	26.52	25.11	1532.16	250.88	19.79	64.25	670.17	81.16	280.07	418.32
Micrurus_fulvius	19.8	12.82	4.21	63.19	34.19	3.85	30.35	23.36	16.85	27.46	11.25	1065.58	140.29	51.28	33.89	363.56	183.41	317.32	226.75
Micrurus_narduccii	25.08	10.81	8.07	6.03	31.57	18.14	13.43	25.19	24.44	25.66	24.18	2335.88	281.49	107.01	32.69	788.16	357.15	629.02	424.57
Micrurus_pyrrhocryptus	21.4	12.97	5.57	36.48	33.16	9.49	23.67	25.14	16.76	25.78	16.53	1032.95	154.38	26.58	52.89	418.46	97.52	368.09	111.66
Mimophis_mahfalensis	23.4	12.97	6.62	21.5	32.18	12.67	19.51	25.38	20.41	25.53	20.22	1189.09	306.78	6.25	105.97	774.5	23.69	591.67	25.85
Mixcoatlus_barbouri	19.45	11.74	6.91	10.79	28.33	11.48	16.85	19.3	19.88	20.91	18.13	1406.82	318.09	6.09	103.09	861.18	25.27	310.09	45.55
Mixcoatlus_melanurus	16.51	16.6	6.99	17.05	27.84	4.28	23.56	17.64	14.17	18.47	14.07	657.5	153.86	5.07	91.79	345.07	19.86	258.5	24.29
Mochlus_brevicaudis	26.33	10.29	6.8	12.33	34.59	19.41	15.19	25.83	26.54	28.02	24.8	1667.62	341.2	11.5	71.57	847.66	63.81	253.22	708.13
Mochlus_sundevalli	22.1	13.62	6.24	24.65	32.31	10.19	22.12	23.83	18.77	24.65	18.51	747.53	170.15	2.53	99.36	446.41	11.51	240.17	18.56
Montivipera_albizona	6.1	12.98	3.55	77.36	25.85	-10.25	36.1	4.12	15.4	15.5	-4.33	504.17	68.83	8.17	47.83	185.5	32.33	54.17	162
Montivipera_bornmuelleri	11.42	10.17	3.52	65.04	26.47	-1.95	28.42	2.96	19.24	19.33	2.95	620.2	136.07	0.2	93.13	365.07	2	2.33	361.67
Montivipera_raddei	8.22	11.75	3.08	89.89	28.29	-9.26	37.56	6.64	17.53	19.43	-3.62	444.94	76.48	8.85	56.81	195.81	30.77	41.38	119.71
Montivipera_wagneri	4.38	11.76	3.02	88.99	24.65	-13.7	38.35	6.32	15.34	15.34	-7.37	569.91	81.45	21	37.09	215.82	77.82	81.18	122.27
Montivipera_xanthina	12.37	11.11	3.62	68.82	29.12	-1.17	30.29	5.31	20.97	21.17	3.64	638.37	111.21	10.8	57.69	292.1	43.12	53.18	287.01
Morelia_spilota	21.86	13.99	5.02	49.37	35.46	7.47	27.99	25.01	18.75	27.7	15.14	497.86	94.24	13.1	59.92	247.46	47.62	183.47	69.33
Morelia_viridis	24.62	8.82	7.76	9.74	30.48	18.74	11.75	25.19	23.81	25.59	23.16	2644.56	335	141.95	42.14	935.89	457.31	750.03	523.03
Morunasaurus_annularis	21.53	10.17	8.78	3.98	27.44	15.91	11.53	21.17	21.73	21.95	20.91	3345.14	372.3	202.35	19.41	1053.17	647.31	753.99	989.78
Mussurana_bicolor	23.19	12.01	5.57	33.48	33.86	12.24	21.62	26.36	18.93	27.19	18.74	1175.28	161.38	33.87	44.72	438.56	125.23	412.36	139.32
Myriopholis_algeriensis	22.01	14.78	4.12	70.9	40.46	4.68	35.78	18.94	27.98	31.1	12.79	74.16	13.97	0.94	62.05	35.11	5.24	9.36	21.23
Myriopholis_boueti	27.49	15.2	5.44	40.24	40.72	12.62	28.1	29.81	24.05	32.16	21.92	309.32	102.04	0.05	137.46	234.06	0.42	46.77	29.88
Myriopholis_rouxestevae	27.52	13.84	5.94	22.72	38.92	15.86	23.06	25.94	26.9	30.94	25.28	1171.4	311.4	0	116.4	828.2	0	68.2	8.6
Myron_richardsonii	26.34	10.79	6.36	20.67	34.32	16.82	17.5	27.69	23.87	28.49	23.24	1659.03	292.8	46.33	89.74	798.41	162.65	529.03	190.73
Nactus_multicarinatus	25.01	6.88	7.98	6	29.46	20.8	8.66	25.51	24.55	25.66	24.14	3156.57	385.46	182.8	25.73	1066.55	603.92	954.71	684.98
Nactus_pelagicus	24.14	6.3	6.49	12.28	29.26	19.43	9.83	25.55	22.7	25.62	22.47	2508.59	357.72	101.33	41.15	979.54	336.48	938.73	354.15
Nadzikambia_mlanjensis	20.25	11.1	6.1	21.63	29.13	11.05	18.08	21.88	18.05	22.35	17	1769.25	318.75	23.25	77.75	919	101.25	483.25	134.25
Naja_atra	19.22	8.03	3.31	59.29	30.98	6.18	24.81	24.14	12.41	26.21	11.12	1575.59	283.42	31.39	65.26	755.26	116.25	674.05	135.41
Naja_kaouthia	23.62	10.22	5.27	25.81	32.21	12.52	19.68	25.29	20.4	26.36	19.82	1918.23	398.96	9.57	84.93	1066.29	46.51	648.18	82.69
Naja_katiensis	27.19	13.33	6.03	20.8	37.95	15.9	22.04	25.88	25.69	30.17	24.91	938.71	251.03	0.37	111.64	626.71	3.48	125.27	190.76
Naja_mandalayensis	26.48	11.33	4.53	35.9	37.58	12.83	24.75	28.31	23.12	30.08	21.03	905.05	165.91	1.4	84.16	440.67	9.55	312.31	11.72
Naja_siamensis	25.87	9.97	5.65	17.88	34.13	16.36	17.77	26.32	23.66	27.89	23.27	1655.52	336.08	6.18	82.52	876.64	34.77	403.1	67.15
Naja_sumatrana	25.59	8.48	8.75	3.37	30.61	20.94	9.68	25.35	25.58	25.95	25.13	2800.87	337.37	140.53	27.71	924.92	468.38	664.21	781.97
Nannoscincus_garrulus	20.35	7.65	5.35	24.13	27.35	13.15	14.2	23.4	18.75	23.4	17.15	1666.5	228.5	76	38.5	666.5	243	666.5	275.5
Nannoscincus_gracilis	21.68	7.33	5.38	22.52	28.18	14.68	13.5	24.48	19.57	24.48	18.69	1685.17	255.83	70.33	45	724.33	222.58	724.33	251.17
Nannoscincus_greeri	22.23	7.03	5.38	21.12	28.33	15.4	12.93	24.85	20.1	24.85	19.4	2104.5	324.75	82.5	49	939	261.25	939	289.25
Nannoscincus_hanchisteus	22.9	7.1	5.45	21.6	29	16.05	12.95	25.6	20.7	25.6	20	1304.5	203	54.5	47.5	574.5	170.5	574.5	192.5
Nannoscincus_humectus	21.66	7.07	5.36	21.64	27.93	14.87	13.06	24.36	19.49	24.36	18.77	1704.29	266.29	68	49.57	767.71	213	767.71	237.29
Nannoscincus_mariei	21.28	7.21	5.2	24.02	28.01	14.29	13.72	24.29	20.36	24.29	18.09	1742.8	229.5	79.4	34.7	643.6	253.5	643.6	302
Nannoscincus_slevini	21	7.6	5.4	23.52	27.8	13.8	14	23.9	18.7	23.9	17.9	1563	232	69	42	653	219	653	247
Natriciteres_olivacea	24.56	12.6	6.79	15.9	33.83	14.84	18.99	24.59	23.17	26.48	22.45	1134.56	221.89	10.65	88.15	574.33	46.54	260.39	203.13
Natrix_maura	14.28	10.94	3.82	59.86	30.06	1.84	28.23	11.15	20.25	22.18	6.87	559.76	72.51	18.41	40.15	197.1	73.18	82.17	174.34
Natrix_tessellata	10.62	11.23	3.04	90.88	29.99	-6.78	36.77	10.82	12.33	22	-1.25	447.17	65.91	16.57	48.06	175.71	56.6	93.47	126.17
Naultinus_gemmeus	8.2	9.9	4.54	41.11	19.62	-2	21.62	8.78	7.01	13.25	2.59	1249	123.79	75.71	12.89	344.48	280.32	302.67	297.54
Naultinus_manukanus	9.28	8.68	4.53	35.31	19.16	0.25	18.91	5.45	13.65	13.66	4.6	1244.02	127.12	65.42	15.78	356.08	245.44	250.98	352.54
Nephrurus_levis	23.09	14.96	4.79	57.16	37.9	6.94	30.96	28.73	18.6	29.8	15.29	254.55	51.09	5.41	61.57	127.59	21.93	115.22	34.37
Nephrurus_stellatus	17.11	13.07	5.26	41.02	30.18	5.53	24.64	12.85	21.36	22.19	11.71	316.44	41.05	13.68	30.47	114.08	49.04	51.84	108.79
Nephrurus_wheeleri	23.79	14.13	4.96	50.77	38.26	10.01	28.25	22.58	24.53	30.14	17.12	249.12	51.21	1.51	77.41	128.15	9.09	88.65	88.88
Nerodia_cyclopion	18.16	11.92	3.75	70.96	33.32	1.79	31.53	18.96	20.49	26.87	8.59	1355.97	148.77	78.55	18.94	406.23	264.9	327.3	349.51
Nerodia_erythrogaster	16.82	13.27	3.84	75.75	33.53	-0.9	34.43	19.94	13.03	26.21	6.67	1042.71	128.62	52.06	31.2	339.81	181.36	282.29	225.41
Nerodia_fasciata	18.56	12.45	4.02	67.03	33.41	2.44	30.97	21.66	18.04	26.8	9.55	1265.41	153.04	66.69	25.49	413.64	233.07	359.63	291.65
Nerodia_floridana	20.71	12.24	4.67	51.71	32.86	6.68	26.18	26.8	16.84	26.93	13.75	1330.57	189.27	56.33	40.44	521.73	200.13	511.27	246.99
Nerodia_harteri	17.93	14.08	3.8	79.13	35.65	-0.9	36.55	22.35	7.91	27.82	7.35	728.54	103.77	33.23	36.12	252.46	111.08	189.46	111.31
Nerodia_rhombifer	17.72	12.89	3.86	73.64	34.02	0.34	33.68	20.68	13.67	26.76	7.78	1036.6	136.01	47.97	34.39	349.94	168.41	271.79	206.01
Nerodia_sipedon	10.94	12.37	3.23	90.84	29.8	-8.25	38.05	17.12	2.89	22.22	-1.27	1036.45	117.47	54.66	24.91	326.6	185.17	296.12	208.33
Nerodia_taxispilota	18.56	12.61	4.29	62.16	32.57	3.17	29.41	23.14	15.64	26.21	10.26	1282.76	163.03	63.95	29.2	449	221.3	435.59	284.87
Notechis_scutatus	13.3	10.09	5.06	33.48	24.43	4.73	19.7	9.63	17.51	17.63	9.1	915.85	123.05	35.27	40.98	340.16	125.31	127.2	333.86
Nothopsis_rugosus	25.42	8.36	7.7	6.63	31.11	20.2	10.91	25.5	25.41	26.19	24.51	3256.62	454.14	102.01	49.18	1227.83	357.14	734.27	786.85
Oedodera_marmorata	23.1	7.3	5.55	21.15	29.3	16.25	13.05	25.7	21	25.7	20.3	1101	184	35.5	54.5	513.5	124.5	513.5	146.5
Oligodon_barroni	24.14	8.35	6.14	14.84	30.75	17.08	13.68	24.57	22.72	25.82	22.03	1743.57	316.51	12.82	73.76	857.24	63.23	439.84	126.9
Oligodon_chinensis	18.07	8.55	3.14	67.76	31.23	3.58	27.65	23.94	10.43	26.21	8.88	1409.5	254.28	31.61	64.64	672.46	115.52	594.98	135.59
Oligodon_cinereus	22.16	9.75	4.82	34.66	31.47	10.53	20.93	24.89	17.82	25.97	17.18	1746.56	351.53	16.91	80.26	940.6	68.45	647.85	102.7
Oligodon_cruentatus	26.05	10.73	4.75	27.67	36.57	14.06	22.51	27.12	23.39	29.04	21.96	1747.55	374.3	2.01	92.96	1036.71	13.11	365.42	16.22
Oligodon_cyclurus	22.98	10.26	5.05	29.08	31.82	11.42	20.4	25.12	19.29	26.06	18.71	1770.6	374.21	7.95	86.43	997.64	39.59	655.37	54.28
Oligodon_formosanus	18.79	7.96	3.1	63.67	31.23	5.28	25.95	23.7	11.74	26.35	10.11	1563.08	272.11	35	62.19	734.83	127.54	640.79	152.68
Oligodon_maculatus	24.85	9.37	8.39	4.38	30.63	19.55	11.09	24.62	24.85	25.35	24.26	2605.01	338.11	121.07	32.71	922.71	394.68	591.39	684.8
Oligodon_ocellatus	24.04	8.93	6.07	15.03	31.32	16.69	14.63	24.09	22.9	25.76	21.94	1959.16	361.16	17.05	73.65	974.7	75.79	450.4	184.16
Oligodon_octolineatus	25.48	8.58	8.72	3.36	30.55	20.72	9.83	25.27	25.43	25.84	25.02	2794.46	339.12	137.43	28.99	932.17	457.92	671.34	750.71
Oligodon_planiceps	26.78	10.37	4.87	21.61	37.17	15.91	21.26	27.04	25.13	29.37	23.67	2080.76	459.14	1.39	98.38	1293.31	10.24	293.77	14.58
Oligodon_splendidus	25.41	11.07	4.57	34.47	36.18	12.23	23.95	27.36	21.83	28.86	20.17	1132.77	213.29	2.02	85.53	579.92	13.46	414.25	16.38
Oligodon_sublineatus	25.3	7.47	7.04	6.08	30.77	20.2	10.57	25.2	24.98	26.09	24.48	2966.25	402.6	104.5	37.83	1018.83	401.6	849.02	640.75
Oligodon_taeniatus	25.32	9.22	5.55	19.92	33.16	16.46	16.71	26.14	22.96	27.61	22.47	1761.23	357.04	8.96	81.07	933.45	47.78	460.32	89.67
Oligodon_taeniolatus	25.65	12.01	4.54	43.9	39.13	11.93	27.2	27.14	23.77	31.15	19.72	1031.3	300.93	3.91	116.53	728.39	22.43	187.72	93.3
Oligodon_theobaldi	26.61	11.25	4.59	32.12	37.95	13.7	24.25	27.8	23.9	30.02	21.8	793.06	152.88	0.55	84.51	398	6.96	257.31	10.94
Oligodon_torquatus	24.89	11.16	4.6	34.36	35.37	11.37	24	26.99	21.19	28.32	19.69	1302.99	257.79	3.48	87.16	708.69	18.91	533.56	22.14
Oligosoma_acrinasum	8.04	9.23	4.77	33.44	18.21	-0.89	19.1	8.37	3.5	12.26	3.5	2684.57	254.14	179.43	10.71	722.29	597.57	666.86	597.57
Oligosoma_fallai	16.6	7.2	4.7	26.77	24.8	9.6	15.2	13.3	19.9	20.2	13.3	1031	120	62	25	347	190	206	347
Oligosoma_notosaurus	8.61	8.77	5	29.71	17.51	0.16	17.36	6.81	5.36	12.33	4.57	1318.14	131	83.86	13.43	378	290.86	329.43	304.43
Oligosoma_oliveri	15.33	8.57	4.8	31.46	24.43	6.7	17.73	11.33	17.77	19.4	11.33	1883.67	222.67	116	21.67	610.67	360.67	432.67	610.67
Oligosoma_otagense	8.36	9.56	4.51	40.45	19.34	-1.6	20.94	11.59	5.24	13.3	2.82	802.55	81	50.82	13.82	223.73	180.09	214.91	184.91
Oligosoma_suteri	15.2	8.15	4.73	30.67	24.13	7.03	17.1	11.33	18.3	19.25	11.33	1588	183.25	99.75	20	519.25	312.25	343	519.25
Oligosoma_zelandicum	12.16	8.34	4.59	32.36	21.46	3.47	17.98	8.79	15.81	16.26	7.92	1749.14	178.9	96.24	15.66	515.66	347.21	349.17	504.1
Omanosaura_cyanura	23.97	9.99	4.07	50.95	35.75	11.56	24.19	19.26	26.45	30	17.06	141.44	37.75	0.69	91.53	83.53	7.36	14.88	66.39
Omanosaura_jayakari	24.67	10.76	4.28	49.65	36.76	12.01	24.75	19.86	27.88	30.48	17.91	121.51	37.2	0.59	103.36	74.15	6.12	11.47	60.08
Oocatochus_rufodorsatus	9.13	10.6	2.53	111.11	28.7	-12.93	41.63	21.7	-5.37	22.69	-5.98	855.95	188.57	15.68	85.79	459.08	57.54	433.78	63.8
Opheodrys_aestivus	16.52	12.8	3.83	74.06	32.73	-0.66	33.39	19.16	13.8	25.68	6.57	1172.4	138.94	63.04	24.77	371.86	217.03	317.42	263.49
Ophiomorus_latastii	18.83	11.73	4.35	57.05	32.58	5.93	26.65	11.26	25.42	25.54	11.23	388.72	95.89	0	106.36	252.87	0.02	0.4	247.33
Ophiomorus_punctatissimus	14.19	10.24	3.69	60.94	29.45	2.18	27.28	7.8	22.08	22.11	6.73	755.91	144.29	8.88	72.09	384.2	34.13	38.61	364.4
Ophiophagus_hannah	23.9	9.31	6.19	21.59	31.58	14.95	16.63	25.3	21.48	26.26	20.81	2105.79	359.69	53.57	65.08	960.88	188.02	621.75	317.25
Ophisaurus_attenuatus	16.07	12.83	3.74	77.25	32.8	-1.63	34.42	19.01	12.12	25.63	5.68	1168.48	140.16	59.1	26.34	376.73	206.24	322.27	253.86
Ophisaurus_ventralis	18.93	12.61	4.32	61.28	32.74	3.6	29.14	21.75	16.95	26.43	10.73	1343.64	168.21	65.01	28.76	461.56	233.3	438.77	311.68
Ophisops_occidentalis	16.15	11.67	3.81	64.9	33.09	2.72	30.36	11.69	24.56	24.7	8.15	314.38	43.66	4.97	47.69	117.72	28.81	32.56	107.79
Ophryacus_undulatus	18.05	12.81	6.75	15.51	27.45	8.6	18.86	18.7	17.13	19.91	15.91	1733.36	348.82	25.23	86.14	942.05	88.32	406.59	126.55
Opisthotropis_cheni	16.13	8	2.93	65.76	28.83	1.95	26.88	19.6	9	24	7.2	1603.75	285.25	41	60.75	763.25	128	570	182
Opisthotropis_guangxiensis	18.79	8.13	3.11	63.74	30.9	5.02	25.88	24.53	11.92	26.16	10.04	1594.71	287	41.71	63.93	763.07	135.14	670.36	168.79
Opisthotropis_lateralis	21.63	7.47	3.37	52.18	31.51	9.61	21.9	27.17	15.63	27.48	14.35	1651.77	300.26	26.87	72.08	829.78	99.38	812.98	113.92
Opisthotropis_latouchii	18	7.91	2.82	70.3	31.61	3.73	27.88	23.04	10.11	26.5	8.5	1528.61	255.62	37.82	57.4	689.73	137	585.29	162.35
Oplurus_cuvieri	25.17	12.71	6.62	19.12	33.53	14.39	19.14	26.74	22.37	26.99	22.28	1252.79	348.54	3.09	114.38	854.97	13.07	549.92	13.35
Oplurus_cyclurus	24.77	13.34	6.58	22.15	33.62	13.46	20.16	26.82	21.77	27	21.49	1010	274.37	3.97	107.63	678.69	16.26	467.48	18.93
Oplurus_fierinensis	23.73	13.45	6.47	25.82	32.73	12.12	20.61	26.59	20.12	26.59	20.08	564.66	147.75	2.53	108.38	386.75	11.53	381.19	11.62
Oplurus_grandidieri	21.06	12.27	6.18	25.65	30.16	10.47	19.7	23.58	17.51	23.64	17.26	985.86	254.79	9.62	106.29	641.05	33.17	603.5	34.31
Oplurus_quadrimaculatus	21.89	12.56	6.31	27.27	30.87	11.2	19.67	24.84	18.84	24.85	18.02	975.27	199.12	19.91	82.52	536.92	70.74	523.08	87.88
Oplurus_saxicola	23.24	14.02	6.48	28.2	32.89	11.48	21.41	26.26	19.84	26.27	19.2	667.68	148.98	8.55	89.27	401.13	30.57	397.98	39.11
Orraya_occultus	24.83	10.23	6.1	19.43	32.8	16.23	16.58	26.33	22.55	27	22	1306.5	323.25	3.75	112.5	910.75	13.5	555.5	18.75
Ovophis_monticola	16.25	10.43	4.43	48.11	27.33	2.68	24.65	20.58	10.53	21.84	9.62	1456.13	283.63	21.61	80.27	755.31	82.69	612.05	116.97
Oxyrhabdium_leporinum	25.52	8.18	6.88	10.28	31.64	19.73	11.91	25.38	24.81	26.75	24.06	2523.33	444.94	47.54	62.75	1163.15	176.48	566.41	339.54
Oxyrhopus_melanogenys	25	10.75	8.14	5.28	31.36	18.17	13.19	25.06	24.44	25.51	24.21	2342.71	280.34	101.83	32.95	792.06	344.18	619.05	415.91
Pachydactylus_fasciatus	20.73	13.95	6.58	24.36	30.16	9.14	21.02	22.96	17.18	23.14	17.12	192.24	54.33	0	116.98	141.16	0.48	91.05	0.51
Pachydactylus_labialis	17.37	14.77	5.72	39.47	30.72	4.98	25.74	13.19	21.84	22.16	12.14	187.73	30.63	4.44	54.05	83.32	17.65	21.55	81.39
Pachydactylus_maculatus	17.62	12.57	5.74	31.35	27.61	5.85	21.76	20.52	14	21.34	13.32	701.34	102.58	19.21	47.11	283.26	67.75	274.7	71.25
Pachydactylus_tsodiloensis	21.99	15.69	5.59	37.06	33.99	6.04	27.95	25.02	16.5	25.36	16.48	486.54	117	0	104.71	313.79	0.54	157.54	0.67
Pachydactylus_vansoni	19.71	13.23	5.85	31.82	29.31	6.84	22.47	23.07	15.38	23.2	15.17	738.98	127.34	11.22	70.1	355.16	41.37	351.1	42.22
Palleon_lolontany	19.87	12.3	7.1	17.83	27.97	10.79	17.19	21.57	17.34	21.59	17.31	1519.29	325.43	15.29	95.43	902.71	52.14	899.86	60.43
Palleon_nasus	19.77	10.86	6.23	25.22	27.74	10.46	17.28	22.47	17.12	22.5	16.16	1497.46	286.36	37.92	74.06	778.02	133.52	769.7	154.66
Pamelaescincus_gardineri	25.83	4.17	6.63	6.05	29.43	23.19	6.24	25.8	25.26	26.61	25.06	2198.29	370.57	67.29	48.14	936.57	229.43	529.57	285
Panaspis_togoensis	25.9	11.03	6.86	12.27	34.37	18.22	16.16	24.85	25.94	27.59	24.42	1459.91	269.75	9.01	74.1	700.76	47.93	237.06	575.54
Panopa_carvalhoi	26.63	10.18	8.71	4.7	32.54	20.91	11.63	25.99	26.81	27.04	25.88	1785.08	314.69	50.87	63.42	859.44	182.71	255.6	798.75
Pantherophis_bairdi	18.53	15.08	4.64	62.9	33.75	1.24	32.51	23.87	11.33	26.09	9.99	479.28	81.21	14.56	58	201.29	51.98	170.9	54.63
Pantherophis_emoryi	16.44	14.77	4.15	74.36	33.89	-1.92	35.81	22.38	8.54	25.65	6.5	625.13	96.24	21.92	52.5	243.36	81.07	201.29	84.76
Pantherophis_guttatus	17.11	12.83	4.1	67.81	32.17	0.97	31.21	18.19	16.45	25.5	8.06	1335.52	156.34	72.93	22.8	427.43	248.49	383.75	330.14
Pantherophis_obsoletus	14.32	12.55	3.57	80.92	31.59	-3.59	35.19	19.03	8.74	24.35	3.44	1118.33	129.7	59.48	24.13	353.09	203.6	311.82	237.21
Pantherophis_slowinskii	19.1	12.13	3.94	66.09	33.55	3.21	30.34	18.78	19.94	27.15	10.14	1380.28	151.99	86.22	16.5	399.15	281.57	344.63	359.6
Pantherophis_vulpinus	7.95	11.99	2.77	106.58	28.76	-13.85	42.61	19.86	-6.54	20.98	-6.63	832.6	106.68	26.33	40.41	304.78	96.66	299.23	97
Paracontias_brocchii	23.55	9.53	7.23	12.87	29.5	16.45	13.05	24.68	22.2	24.73	21.68	1419.25	349	13.5	102.5	899	56.25	829.25	62.25
Paracontias_hildebrandti	22.52	10.88	7.03	16.55	29.65	14.27	15.38	24.08	20.37	24.14	20.12	1620.45	339.86	25.7	87.04	925.84	96.49	808.99	103.89
Paracontias_holomelas	22.59	8.74	6.24	20.71	29.49	15.6	13.89	24.84	21.35	24.98	19.73	2332.59	331.04	68.7	46.15	953.26	262.59	927.89	397.63
Paracontias_manify	18.7	12.5	7.1	18.37	27	9.6	17.4	20.5	16.1	20.5	16	1489	316	15	95	882	52	882	61
Paracontias_rothschildi	26.6	7.9	6.8	11.95	32.2	20.6	11.6	27.6	25.3	27.8	24.8	1152	311	13	106	760	54	753	60
Paragehyra_gabriellae	21.25	10.98	6.37	24.51	29.17	12.02	17.15	24.07	19.07	24.07	17.85	1228.17	194.67	43.67	52.5	543.83	155.17	534	195.5
Parahydrophis_mertoni	26.82	8.86	6.21	17.99	33.54	18.97	14.58	28.05	24.63	28.72	24.11	1504.85	310.85	20.17	95.7	864.11	71.39	543.05	92.4
Paralaudakia_erythrogaster	13.87	14.56	3.77	83.86	34.18	-3.98	38.16	6.8	24.46	24.72	3.04	284.09	64.66	0.34	88.93	157.76	1.98	2.59	117.75
Paralaudakia_lehmanni	-1.39	9.59	2.55	90.57	17.23	-19.71	36.93	-2.41	6.26	9.82	-13.56	542.03	90.21	11.16	54.25	245.99	45.2	64.51	158.39
Paralaudakia_microlepis	16.38	15.87	3.98	84.21	36.23	-3.23	39.46	8.24	24.22	26.97	5.15	183.03	40.69	0.81	91.2	103.97	4.79	14.28	88.67
Parastenophis_betsileanus	20.99	10.57	6.49	22.62	28.67	12.49	16.18	23.41	18.75	23.44	17.81	1795.79	327.85	42.75	71.86	911.25	160.08	887.09	197.63
Pareas_boulengeri	15.94	8.28	2.87	71.5	29.95	1.35	28.6	22.52	7.69	24.68	6.3	1350.95	233.81	30.16	62.34	625.86	107.82	554.47	128.24
Pareas_carinatus	25.03	9.22	7.1	12.76	31.72	17.72	14	25.53	23.64	26.43	23.2	2269.84	349.46	73.44	56.08	937.58	252.61	596.39	422
Pareas_formosensis	19.05	7.34	4.3	35.55	26.9	9.83	17.07	22.74	15.81	23.07	14.19	2533.23	464.94	53.85	69.55	1247.84	184.8	1181.83	225.95
Pareas_hamptoni	20.7	10.1	4.92	33.87	29.52	9.03	20.49	23.76	16.32	24.32	15.81	1611.09	341.74	11.73	85.52	908.66	51.67	688.57	66.95
Pareas_margaritophorus	24.82	9.58	5.47	23.84	33.25	15.05	18.2	26.25	21.99	27.49	21.4	1781.38	342.69	22.19	76	901.69	87.55	514.84	160.05
Pareas_nuchalis	25.53	7.89	8.89	2.85	30.15	21.31	8.85	25.37	25.54	25.8	25.12	3012.13	339.12	164.79	22.22	938.43	543.12	709.44	818.33
Paroedura_androyensis	23.71	12.58	6.26	27.57	32.67	12.76	19.91	26.8	20.53	26.81	19.85	575.67	116.14	12.19	80.72	316.67	45.28	310.81	58.57
Paroedura_bastardi	24.48	13.61	6.5	24.4	33.55	12.79	20.76	26.9	21.26	26.99	20.91	855.11	224.21	4.79	104.04	565.36	19.02	451.31	22.86
Paroedura_gracilis	22	9.47	6.41	21.76	29.24	14.6	14.64	24.42	20.27	24.45	19	2136.9	346.23	59.72	57.76	977.3	228.78	974.07	300.94
Paroedura_homalorhina	25.2	12.16	6.56	17.92	33.25	14.78	18.47	26.55	22.54	26.79	22.4	1312	352	3.2	110.3	880.3	15.5	512.3	16
Paroedura_karstophila	25	12.17	6.59	17.51	33.04	14.64	18.4	26.3	22.39	26.51	22.24	1356.57	358	3.71	109	901.43	17.29	448.57	18
Paroedura_lohatsara	26.08	8.18	6.85	12.09	31.75	19.88	11.88	27.15	24.78	27.25	24.28	1198.5	320.25	12.5	107	789.25	52.75	781.5	58.5
Paroedura_masobe	21.98	9.64	6.32	23.26	29.4	14.26	15.14	24.7	19.94	24.7	18.82	1994.6	330.8	53.2	61.2	944.2	207.2	944.2	252.2
Paroedura_oviceps	25.3	9.72	7.04	12.74	31.47	17.77	13.7	26.33	23.6	26.44	23.4	1611.49	386.11	17.07	97.98	997.21	63.7	760.09	67.56
Paroedura_picta	24.47	13.61	6.48	25.3	33.56	12.73	20.83	27.05	21.19	27.1	20.8	766.72	203.74	5.17	104.39	513.98	20.17	451.07	25.16
Paroedura_sanctijohannis	22.13	7.3	6.8	12.66	27.15	16.5	10.65	23.3	20.75	23.38	20.3	1855.25	341.75	41.75	65.5	877.25	165	775.25	186
Paroedura_stumpffi	26.1	11.03	6.88	13.92	33.12	17.15	15.97	27.03	24.1	27.34	23.96	1510.87	422.32	6.51	114.59	1028.91	25.47	625.64	26.72
Paroedura_tanjaka	25.3	12.87	6.47	19.04	33.87	14.1	19.77	26.73	22.47	27	22.3	1252	339	2	110.33	843	11.33	377.67	11.33
Paroedura_vazimba	26.44	12.67	6.71	15.58	34.93	16.13	18.8	27.4	24.08	27.9	24.03	1525.7	447.39	1.48	120.17	1075.96	6.39	536.48	6.39
Parvilacerta_fraasii	9.8	9.62	3.38	65.11	24.87	-3.13	28	1.5	17.77	17.83	1.47	730.5	158	0.33	89.67	417.67	3.67	4	409.17
Parvilacerta_parva	8.93	12.01	3.5	76.05	27.28	-6.58	33.86	6.72	16.96	18.37	-1.13	483.18	67.76	11.3	44.68	181.02	43.51	63.74	150.96
Parvoscincus_sisoni	23	7.1	7.6	5.93	28.1	18.8	9.3	22.7	23.1	23.9	22.3	3098	483	47	61	1362	159	712	342
Pedioplanis_gaerdesi	19.9	10.9	6.33	20.98	27.21	10.28	16.93	21.89	16.81	21.93	16.73	146.23	41.61	0	115.59	106.53	0.01	90.53	0.05
Pedioplanis_laticeps	17.2	16.61	5.09	54.76	33.06	0.7	32.36	21.57	10.97	23.85	9.81	243.78	45.6	6.43	58.28	113.45	21.89	87.76	23.44
Perochirus_ateles	26.45	5.93	7.6	5.73	30.25	22.45	7.8	26.73	25.98	26.98	25.5	2818.5	367.75	122.25	40.5	1033.25	432	667.25	548.75
Petrosaurus_mearnsi	16.41	16.2	5.31	52.03	33.08	2.75	30.33	11.24	18.49	23.64	10.38	261.16	43.97	0.92	63.82	122.64	12.1	45.07	115.33
Petrosaurus_repens	20.49	15.63	5.77	43.44	34.43	7.52	26.91	23.8	20.82	26.53	15.32	166.82	39.34	0.19	86.09	95.4	2.42	88.63	49.56
Petrosaurus_thalassinus	21.69	13.69	5.72	39.5	32.72	9	23.72	26.4	21.6	26.74	16.72	355.85	111.4	0.45	120.7	255.25	3.6	253.45	38.9
Phalotris_lemniscatus	18.75	11.41	4.91	40.26	31.16	8.1	23.06	19.59	17.45	23.87	13.71	1390.7	144.75	86.94	14.8	398.63	288.52	350.64	309.09
Phelsuma_abbotti	25.6	9.93	6.9	13.58	32.04	17.7	14.35	26.67	23.83	26.83	23.54	1491.79	367.25	15.13	100.38	933.07	56.67	663.56	65.26
Phelsuma_andamanense	26.62	5.6	6.21	6.35	31.61	22.64	8.97	26.58	26.4	27.46	25.93	2863.12	476.17	19.62	68.92	1290.58	102.17	847.79	304.38
Phelsuma_antanosy	23.2	10.9	6.3	24.94	31	13.8	17.2	26.1	21.2	26.1	19.8	1098	159	44	42	446	154	446	218
Phelsuma_astriata	25.97	4.17	6.65	6.07	29.56	23.34	6.23	25.95	25.41	26.76	25.21	2202.73	372.09	67.27	48.36	940	229.18	529.82	285.27
Phelsuma_barbouri	17.45	10.8	6.25	25.04	25.55	8.45	17.1	20	15.2	20.05	13.85	1469.5	306	32.5	83.5	810.5	103.5	803	119.5
Phelsuma_berghofi	23.22	9.43	5.88	23.92	30.57	14.65	15.92	25.92	21.38	25.95	19.87	2365	355.17	82.5	46.67	1006.5	314.67	980.5	405.5
Phelsuma_breviceps	24.03	12.98	6.32	26.54	33.14	12.82	20.32	27.06	20.61	27.06	20.34	463.74	114.3	3.78	98	302.22	16.89	301.22	18.59
Phelsuma_cepediana	22.23	7.22	5.47	21.59	28.73	15.67	13.07	24.87	20.42	24.87	19.47	1840	294.83	58	51.5	801.5	207.33	801.5	266.5
Phelsuma_comorensis	20.5	7.55	6.9	12.75	25.55	14.7	10.85	21.75	19.55	21.75	18.65	2181	348	56	51.5	929.5	233.5	929.5	275.5
Phelsuma_flavigularis	19.1	10.75	6.4	25.69	27.25	10.55	16.7	21.95	16.85	21.95	15.65	1896	334	52	66.5	936.5	188.5	936	259.5
Phelsuma_guttata	22.34	9.59	6.6	20.31	29.36	14.95	14.41	24.58	20.61	24.59	19.52	2009.82	326.09	55.74	59.49	929	212.69	921.85	266.85
Phelsuma_hielscheri	24.32	13.6	6.39	24.28	33.38	12.25	21.13	26.61	20.72	26.71	20.72	801.54	235.11	1.96	117.39	566.14	8.18	513.25	8.18
Phelsuma_kely	23.9	7.95	5.85	21.25	30.35	16.95	13.4	26.4	23.15	26.4	21.1	2896.5	494.5	84	48	1253.5	344.5	1253.5	500
Phelsuma_klemmeri	25.8	9.37	6.87	13.72	31.63	18.03	13.6	26.97	23.73	27.07	23.73	1662.33	435	11.33	107.33	1069	41	803	41
Phelsuma_laticauda	24.37	10.08	6.93	14.81	31	16.58	14.42	25.68	22.62	25.81	22.21	1709.53	365.24	27.7	85.11	959.53	102.79	736.73	123.33
Phelsuma_lineata	20.45	10.56	6.32	23.65	28.26	11.74	16.52	22.98	18	23.01	17.14	1841.4	343.39	41.84	74.9	941.06	158.46	917.61	203.74
Phelsuma_madagascariensis	21.99	9.48	6.23	22.83	29.27	14.19	15.08	24.53	20.15	24.56	18.87	2203.8	367.06	60.12	60.4	1026.76	235.18	1008.61	319.81
Phelsuma_malamakibo	20.67	11.93	6.53	25.16	29.03	10.9	18.13	23.57	18.13	23.57	17.17	1018.67	174	33	60.33	485.33	111.33	485.33	131.67
Phelsuma_modesta	23.7	12.62	6.27	27.79	32.71	12.75	19.95	26.85	20.54	26.86	19.85	571.27	110.51	12.95	77.88	306.06	47.59	301.26	64.58
Phelsuma_mutabilis	24.39	13.81	6.47	26.67	33.82	12.65	21.17	27.17	21.19	27.26	20.56	697.68	172.09	6.44	93.83	443.56	24.48	363.85	32.19
Phelsuma_nigristriata	25.3	6.5	6.45	13.36	30.25	20.2	10.05	26.4	23.35	26.55	23.35	1276	302.5	13	88.5	733	52.5	526	52.5
Phelsuma_pronki	17.05	10.8	6.3	25.96	25.05	8.1	16.95	19.75	13.6	19.85	13.4	1469.5	296	23.5	88	837.5	86	791	91
Phelsuma_pusilla	21.81	9.58	6.32	22.52	29.12	14.11	15.01	24.3	20	24.33	18.73	2170.91	360.23	58.07	60.48	1010.69	227.11	995.26	309.87
Phelsuma_quadriocellata	20.29	10.97	6.42	24.45	28.32	11.37	16.95	22.91	17.77	22.94	16.85	1637.07	309.9	37.7	75.23	854.44	139.88	842.98	168.17
Phelsuma_ravenala	23.6	7.82	5.84	21.12	29.89	16.63	13.26	26.02	22.59	26.05	20.8	2795.15	444.31	78	47.46	1198.38	322.23	1179.62	497.23
Phelsuma_robertmertensi	25.3	6.5	6.45	13.36	30.25	20.2	10.05	26.4	23.35	26.55	23.35	1276	302.5	13	88.5	733	52.5	526	52.5
Phelsuma_seippi	24.63	10.14	7.08	13.04	30.83	16.63	14.2	25.67	22.7	25.79	22.7	1874	458.67	15	99.33	1161.11	54.22	815.56	54.56
Phelsuma_serraticauda	23.46	8.06	6.14	20.39	30.03	17	13.03	25.76	22.56	25.88	20.72	2751.86	381.43	83.71	42.64	1088.21	318.64	1077.5	471.07
Phelsuma_standingi	23.13	15.11	6.59	26.22	33.29	10.53	22.76	25.8	19.62	25.85	19.27	663.96	170.59	3.88	103.45	438.04	15.86	402.11	16.38
Phelsuma_sundbergi	26.05	4.19	6.65	6.09	29.64	23.39	6.25	26.02	25.47	26.83	25.27	2177.85	367.92	67.31	48.23	929.15	228.08	524.85	282
Phelsuma_vanheygeni	25.7	9	7.05	11.74	31.15	18.5	12.65	26.6	23.9	26.75	23.9	1924.5	476	15.5	98	1188	56	789	56
Philodryas_georgeboulengeri	25.73	10.47	7.7	5.68	32.4	18.73	13.66	25.8	25.13	26.31	24.9	2245.96	307.52	60.17	48.44	870.21	216.25	502.96	371.64
Philodryas_psammophidea	21.42	13.08	5.88	30.81	32.55	9.9	22.66	23.7	18.27	25.05	17.28	1218.39	183.98	29.14	52.5	506.22	107.18	369.63	128.94
Phoboscincus_garnieri	21.89	7.3	5.39	22.38	28.36	14.92	13.44	24.68	20.02	24.68	18.92	1600.34	237.32	65.84	44.48	674.63	212.66	674.63	244.11
Phoenicolacerta_cyanisparsa	16.22	11.79	3.5	79.73	34.3	1.01	33.29	5.93	26.1	26.19	5.93	590.28	111.44	1.12	80.88	315.91	9.12	10.28	315.91
Phoenicolacerta_kulzeri	13.87	10.72	3.79	62.11	28.51	0.57	27.94	5.77	21.28	21.34	5.69	550.08	120.38	0.31	95.23	323.08	2.08	2.69	319.15
Phoenicolacerta_laevis	15.36	10.98	3.73	66.19	30.77	1.56	29.21	7.27	23.39	23.5	6.68	707.26	140.56	4.14	79.78	372.38	18.99	23.58	367.64
Pholidobolus_macbrydei	13.98	10.58	8.68	3.66	20.25	8.14	12.11	14.05	13.61	14.27	13.39	983.65	151.05	33.31	46.7	415.68	118.11	235.68	180.39
Phrynocephalus_axillaris	11.64	15.12	3.14	115.72	33.58	-13.78	47.36	24.59	-0.88	25.09	-4.58	35.46	9.03	0.24	89.37	22.14	1.21	21.63	1.74
Phrynocephalus_helioscopus	5.56	11.4	2.47	122.53	28.86	-16.75	45.61	13.51	0.03	20.68	-10.64	283.88	44.05	9.85	45.12	114.57	34.64	89.52	53.77
Phrynocephalus_przewalskii	4.03	13.74	2.99	113.76	25.78	-19.82	45.6	17.71	-10.32	18.05	-11.29	191.44	49.46	1.09	101.42	121.98	4.59	120.08	4.73
Phrynocephalus_theobaldi	-2.9	13.64	3.84	77.88	14.04	-21.47	35.51	6.2	-10.43	6.91	-13.01	259.61	66.94	1.68	101.89	164.71	10.46	160.81	15.96
Phrynocephalus_versicolor	8.46	14.79	3.04	119.64	31.11	-16.86	47.98	22.44	-4.75	22.77	-7.99	81.64	22.58	0.54	93.02	54.43	2.46	53.66	2.81
Phrynocephalus_vlangalii	4.91	14.31	3.23	106	25.54	-18.56	44.09	17.33	-7.29	17.59	-9.62	169.72	37.78	1.3	89.88	100.8	5.21	100.4	5.6
Phrynosoma_asio	25.23	13.8	7.11	13.22	34.68	15.29	19.4	25.72	24.55	26.85	23.44	1161.36	275.33	2.94	107.28	731.57	13.25	337.9	29.62
Phrynosoma_braconnieri	19.25	15.57	7.01	16.85	30.09	8.02	22.07	20.24	17.35	21.25	16.88	721.11	157.05	5.24	92.73	392.76	20.84	246.14	29.11
Phrynosoma_cornutum	17.06	15.1	4.35	70.34	34.02	-0.85	34.87	23.13	10.53	25.76	7.68	586.42	95.98	19.43	57.76	240.06	71.57	198.34	80.07
Phrynosoma_coronatum	17.02	15.08	5.22	50.57	32.95	3.94	29.01	13.24	21.28	23.81	10.96	347.76	68.97	0.84	81.46	184.13	7.02	36.87	166.58
Phrynosoma_ditmarsi	19.39	17.46	5.04	60.85	36.68	2.32	34.35	26.24	18.81	26.91	11.52	518.25	144.23	5.21	93.62	308.08	34.44	283.35	97.83
Phrynosoma_hernandesi	8.42	16.1	3.99	84.34	29.76	-10.69	40.46	15.42	3.08	19.34	-2.37	373.22	64.71	12.26	51.98	166.42	44.26	138.53	58.65
Phrynosoma_mcallii	22.03	16.1	4.63	67.99	39.82	5.42	34.41	24.62	24.91	30.81	13.56	104.21	18.73	0.15	60.27	45.51	3.89	31.52	37.12
Phrynosoma_modestum	17.05	16.54	4.85	63.93	33.62	-0.47	34.09	23.63	12.15	24.91	8.57	361.31	72.55	7.71	72.56	185.1	29.62	158.49	39.34
Phrynosoma_orbiculare	15.71	16.66	6.18	34.1	28.95	1.9	27.05	18.92	14.29	19.7	11.08	634.36	143.17	7.43	87.63	373.4	31.85	276	63.01
Phrynosoma_platyrhinos	11.88	16.16	4.15	78.15	33.19	-5.44	38.63	9.97	16.49	22.21	2.22	252.87	33.32	9.36	35.36	88.62	36.05	53.97	75.65
Phrynosoma_solare	20.53	16.29	5.24	55.61	35.97	4.8	31.17	26.67	21.5	27.45	13.43	525.31	132.71	4.47	89.64	323.08	22.95	272.34	87.51
Phrynosoma_taurus	22.66	16.44	6.84	19.02	34.43	10.56	23.87	23.6	20.48	25	20.04	788.55	173.09	2.8	99.83	458.75	14.38	247.88	21.72
Phyllodactylus_bordai	22.97	16.24	6.76	19.28	34.79	10.93	23.86	23.85	20.81	25.38	20.34	815.48	178.63	2.93	100.74	480.81	14.7	237.35	22.72
Phyllodactylus_bugastrolepis	23.8	14.35	5.4	47.71	36.5	10.2	26.3	30.1	24.3	30.1	17.9	169.5	42	1	85.5	97.5	6	97.5	41
Phyllodactylus_davisi	25.57	13.3	7.13	15.15	33.73	15.27	18.47	26.87	24	27.23	23.47	859	207	2	108	576.33	8.33	433	29.67
Phyllodactylus_delcampoi	24.34	13.46	7.36	10.26	33.44	15.24	18.2	24.39	24.56	25.74	23.04	1406.5	326.75	3.25	108.62	896.5	17.25	323.88	37
Phyllodactylus_duellmani	25.48	14.85	7	13.65	35.6	14.6	21	26.18	24.73	27	23.43	814	186	2.75	105.25	525	9.75	277.25	34.5
Phyllodactylus_homolepidurus	24.2	16.27	5.46	51.75	38.07	8.54	29.54	30.37	23.4	30.49	17.51	413.63	121.12	1.87	109.42	287.31	11.79	258.4	59.43
Phyllodactylus_lanei	25.41	13.92	6.81	17.44	35.13	14.73	20.4	26.46	24.81	27.48	23.04	1067.36	271.35	2.42	111.63	730.4	12.41	435.87	37.12
Phyllodactylus_paucituberculatus	23.1	15.3	6.8	15.49	34.4	12.1	22.3	23.3	23.2	25.2	21	1095	269	3	111	731	10	213	28
Phyllodactylus_reissii	22.29	10.65	7.33	13.71	29.78	15.2	14.58	23.8	21.16	24.06	20.63	520.58	122.36	6.96	117.12	304.45	25.96	275.68	36.57
Phyllodactylus_tuberculosus	24.88	11.91	7.14	13.09	33.16	16.43	16.74	25.49	24.34	26.45	23.14	1541.43	319.21	8.29	93.48	824.89	33.65	366.63	165.14
Phyllodactylus_unctus	22.02	13.7	5.68	40.13	33.17	9.31	23.87	26.77	21.82	27.16	16.98	339.67	106.78	0.52	119.89	242.74	3.52	240.67	37.3
Phyllodactylus_xanti	19.76	15.76	5.63	45.9	34.36	6.47	27.89	19.57	20.65	26.1	14.31	181.68	39.95	0.3	79.61	98.37	4.27	75.49	60.7
Phyllorhynchus_decurtatus	19.95	15.83	4.77	65.35	37.31	3.87	33.43	21.68	22.55	28.47	11.88	221.61	46.63	1.95	67.41	114.52	11.24	87.6	60.9
Phymaturus_antofagastensis	4.55	13.4	6.45	27.44	14.55	-6.1	20.65	7.55	2.6	7.85	0.8	86.5	18.5	2	69.5	48	8.5	45	12
Phymaturus_mallimaccii	16.8	15.55	4.9	55.56	32.25	0.85	31.4	22.8	9.7	23.9	9.7	220	50.5	2	94.5	137	8	130.5	8
Phymaturus_palluma	3.54	14.86	5.51	44.68	18.3	-8.42	26.72	-1.46	9.16	9.25	-2.21	526.9	94.33	14.9	64.18	259.78	50.06	50.1	248.37
Phymaturus_punae	5.1	14.05	6.05	33.41	16.85	-6.1	22.95	9	4.75	9.45	0.85	123	20	5	39	49.5	19.5	46.5	25.5
Phymaturus_somuncurensis	9.4	14.3	4.89	54.57	25.21	-3.7	28.91	12.2	4.79	16.34	2.4	195.62	22.92	11.42	18.79	57.5	40.71	46.04	45.38
Pituophis_catenifer	11.78	15.09	3.99	80.93	31.58	-6.64	38.22	16.52	7.35	22.09	1.29	484.67	79.31	13.58	53.71	207.2	50.58	155.51	89.61
Pituophis_deppei	17.98	16.11	6.25	30.74	30.59	4.72	25.87	20.63	16.52	21.54	13.76	758.42	172.41	7.54	92.56	454.46	30.89	289.13	56.64
Pituophis_lineaticollis	19.07	14.73	6.93	15.58	29.51	8.35	21.16	19.77	17.8	20.96	16.91	1181.94	243.06	10.72	92.81	652.37	41.09	337.91	55.6
Pituophis_melanoleucus	17.42	12.93	4.16	66.55	32.27	1.35	30.92	17.89	16.97	25.63	8.53	1339.56	158.57	71.32	23.59	434.34	247.93	398.29	331.46
Pituophis_ruthveni	18.2	13.43	4.03	70.04	34	1.17	32.83	13.5	23.4	26.77	8.7	1322.33	141.33	80	15.33	370.67	274	296.67	364
Pituophis_vertebralis	20.69	15.4	5.84	40.86	34.28	8.13	26.14	21.99	20.77	26.39	15.84	157.13	37.25	0.17	82.77	88.69	2.21	78.26	45.94
Placosoma_cordylinum	22.73	12.82	6.75	15.1	31.25	12.39	18.86	23.8	20.79	24.23	20.5	1569.71	281.07	13.76	73.72	772.68	56.08	510.25	79.23
Plagiopholis_styani	17.09	8.03	2.82	71.83	31.08	2.63	28.45	23.12	8.56	25.87	7.39	1421.11	241.28	32.61	60.11	651.06	118.11	569.99	135.95
Platyceps_collaris	14.57	10.85	3.68	66.64	30.36	1.19	29.17	6.62	22.84	22.98	6.07	704.06	136.28	7.4	73.93	360.67	30.29	34.55	355.11
Platyceps_florulentus	23.3	13.6	7.09	16.02	33.17	13.95	19.23	23.57	22.38	25.33	21.27	694.13	159.58	6.88	86.2	377.26	32	144.03	203.36
Platyceps_najadum	13.04	12.13	3.42	80.27	31.97	-2.95	34.92	7.42	21.37	23.18	2.66	544.15	88.94	11.24	62.07	237.45	40.82	53.35	202.87
Platysaurus_intermedius	20.18	13.9	5.73	32.39	30.57	6.51	24.06	23.14	15.59	23.41	15.45	635.46	140.69	2.66	94.81	387.82	12.41	294.74	13.35
Platysaurus_pungweensis	23.21	12.42	6.03	25.96	32.8	12.36	20.44	25.61	20.74	25.65	19.34	1301.69	278.72	17.16	89.12	771.08	63.65	625.04	73.68
Plestiodon_anthracinus	14.75	12.98	3.66	79.51	32.01	-3.25	35.27	16.55	11.71	24.62	4.07	1236.07	138.32	67.56	20.02	374.71	236.19	309.9	278.61
Plestiodon_brevirostris	18.89	14.97	6.65	19.27	29.86	7.44	22.43	20.15	17.88	21.12	16.17	992.25	226.6	6.9	99.32	603.3	27.73	339.94	51.08
Plestiodon_callicephalus	19.34	15.92	5.67	42.52	33.2	4.97	28.23	23.82	19.38	24.44	13.73	786.38	205.25	5.84	99.61	517	29.16	408.66	91.4
Plestiodon_copei	12.27	14.94	6.97	15.59	22.35	1.07	21.29	13.33	10.08	14.01	10.04	1032.06	207.53	9.88	90.12	591.29	39.18	302.35	40.71
Plestiodon_dugesii	17.89	15.64	6.39	23.01	29.8	5.48	24.32	19.29	17.58	20.59	14.64	793.97	184.35	6.44	101	497.94	26.76	187.97	33.79
Plestiodon_egregius	19.69	12.62	4.47	57.79	32.91	4.77	28.15	22.76	17.78	26.71	11.93	1321.07	172.43	59.94	32.79	475.27	216.11	455.52	294.49
Plestiodon_fasciatus	13.78	12.43	3.52	81.73	31.15	-4.11	35.27	18.08	8.94	23.92	2.81	1149.77	129.58	63.48	21.16	354.62	216.86	311.88	255.88
Plestiodon_gilberti	14.33	15.08	4.56	63.91	32.78	-0.12	32.9	9.43	20.49	22.77	6.65	426.8	77.64	3.12	70.01	208.52	16.8	33.95	200.51
Plestiodon_inexpectatus	17.17	12.87	4.1	67.91	32.27	0.98	31.28	18.87	16.35	25.58	8.11	1323.91	154.78	72.15	22.81	424.44	246.14	384.94	325.05
Plestiodon_lagunensis	19.69	14.76	5.8	40.77	32.14	6.93	25.21	25.01	19.81	25.09	14.69	310.14	88.21	0.36	103.5	207.79	3.43	207.57	55.79
Plestiodon_laticeps	15.68	12.75	3.74	76.64	32.25	-1.73	33.97	17.91	13.94	25.18	5.39	1244.1	139.63	70.23	19.84	381.06	240.63	326.75	295.92
Plestiodon_lynxe	16.6	15.85	6.37	26.51	28.58	3.84	24.74	18.77	15.19	19.6	12.87	705.56	162.44	6.05	95.16	432.46	26.82	260.91	49.57
Plestiodon_multivirgatus	9.98	16.64	4.12	83.6	30.78	-9.43	40.21	19.21	4.64	20.85	-0.68	392.59	67.72	11.03	56.22	178.86	39.71	157.05	52.85
Plestiodon_obsoletus	15.71	15.42	4.22	75.53	33.74	-2.86	36.6	22.92	8.18	25.17	5.75	521.63	88.81	14.49	60.05	224.71	53.33	191.77	62.52
Plestiodon_ochoterenae	21.01	13.68	7.05	11.69	30.62	11.38	19.24	21.06	20.68	22.55	19.47	1352.24	293	4.62	103.86	834.71	24.76	327.38	38.14
Plestiodon_parviauriculatus	21.89	17.59	5.73	44.72	36.81	6.36	30.45	26.46	21.43	27.11	15.9	804.49	218.15	6.36	104.41	538	30.18	477.03	105.59
Plestiodon_parvulus	26.4	12.9	7.2	17.75	34	16.2	17.8	28.2	24.3	28.4	24	773	205	2	105	496	9	398	25
Plestiodon_septentrionalis	11.81	12.79	3.12	98.27	31.79	-9.28	41.07	20.84	0.35	23.92	-1.51	813.91	115.64	28.19	43.34	302.87	102.08	263.31	106.33
Plestiodon_skiltonianus	8.13	14.91	4.12	72.53	28.66	-7.44	36.1	3.08	14.53	17.68	-0.85	509.98	75.48	14.7	40.41	209.64	56.71	68.18	193.13
Plestiodon_sumichrasti	24.81	9.92	6.36	18.07	32.55	17.03	15.53	25.86	24.31	26.7	22.18	2049.71	339.69	52.23	59.05	892.12	179.01	495.61	291.24
Plestiodon_tetragrammus	20.15	13.8	4.35	63.52	35.08	3.45	31.62	24.95	13.15	27.77	11.49	597.97	103.3	20.18	53.49	240.59	74.4	189.48	79.44
Plica_lumaria	21.7	10.2	8.5	3.75	27.8	15.8	12	21.5	21.5	22.1	21.2	3125	495	44	65	1475	163	562	230
Podarcis_bocagei	11.52	8.99	3.97	46.38	24.28	1.87	22.41	6.99	17.58	17.69	5.89	1081.71	147.03	30.45	39.79	406.42	121.59	131.18	381.5
Podarcis_carbonelli	13.42	9.15	3.91	49.41	26.69	3.37	23.32	7.82	19.81	19.93	7.32	1140.24	166.18	12.12	54.41	461.35	74.18	79.24	456.41
Podarcis_erhardii	12.26	10.15	3.38	67.8	28.51	-1.03	29.53	6.96	20.56	20.97	3.65	715.33	97.79	26.09	36.4	264.57	92.18	98	238.52
Podarcis_filfolensis	18.4	7.3	3.4	50.16	30.3	9.1	21.2	17	24.7	25.1	12.4	520	96	0	80	271	9	42	174
Podarcis_gaigeae	16.32	6.35	2.85	55.79	27.98	6.3	21.68	9.85	23.62	23.62	9.57	488.5	85.17	8.17	66.33	233.83	27.83	27.83	214.67
Podarcis_hispanicus	12.94	10.29	3.78	57.48	28.36	1.43	26.93	10.42	18.61	20.6	5.95	656.97	84.92	20.2	36.8	230.55	84.96	92.8	199.57
Podarcis_lilfordi	16.59	7.65	3.49	50.73	28.48	6.8	21.68	15.4	23.08	23.49	10.68	565.53	92.82	5.76	50.29	236.24	46.41	86.06	169.47
Podarcis_melisellensis	12.48	8.34	3.1	63.95	26.99	0.55	26.44	8.76	18.52	20.75	4.44	1222.11	157.45	55.25	30.48	436.75	191.96	198.05	365.11
Podarcis_milensis	18	5.8	2.9	51.97	28.6	8.9	19.7	13.4	24.8	24.8	11.7	420	86	0	83	228	2	2	176
Podarcis_muralis	10.23	9.18	3.35	63.95	24.93	-2.18	27.11	11.02	10.22	18.33	1.97	814.72	97.98	43.92	24.61	267.29	147.16	196.05	206.19
Podarcis_peloponnesiacus	14.61	9.77	3.68	58.25	29.29	3.2	26.09	9.11	22.18	22.2	7.56	775.41	138.99	9.46	67.85	373.79	36.99	41.98	344.54
Podarcis_pityusensis	16.9	7.73	3.4	51.29	28.6	6.4	22.2	14.97	23.37	23.87	10.83	472.67	78	4	50	198	42.67	76.67	134
Podarcis_siculus	13.39	8.07	3.12	61.7	27.51	1.97	25.54	11.77	17.51	21.41	5.75	781.38	101.56	32.21	33.78	275.33	117.1	136.26	213.55
Podarcis_tauricus	11.67	9.59	3.15	72.61	27.85	-2.23	30.08	11.59	13.27	20.89	2.33	649.24	87.01	29.17	30.77	233.21	99.65	129.18	192.01
Podarcis_tiliguerta	14.31	7.36	3.23	53.43	27.1	4.72	22.39	11.7	21.26	21.51	8.08	660.19	97.83	8.31	51.02	266.07	48.96	69.19	236.84
Podarcis_vaucheri	15.3	11.47	3.8	61.57	32.01	2.43	29.58	9.53	23.37	23.57	7.84	536.26	80.29	4.95	53.91	221.97	29.67	35.91	210.58
Pogona_barbata	17.24	12.8	4.99	44.87	29.99	4.54	25.45	18.99	15.96	22.69	11.23	758.91	110.18	30.48	40.27	299.49	106.7	254.69	149.22
Polemon_acanthias	25.72	10.16	7.35	9.3	33.04	19.26	13.78	25.32	25.93	26.83	24.46	1946.21	345.24	29.02	59.22	822.49	145.04	358.91	641.95
Polychrus_femoralis	23.49	9.66	7.76	9.04	29.76	17.42	12.35	24.5	22.49	24.62	22.37	773.3	191.98	8.3	108.72	484.14	32.09	456.09	37.86
Porthidium_dunni	24.54	13.18	7.37	11.61	33.03	15.31	17.72	25.26	23.34	25.8	22.9	1121.15	255.31	3.17	103.85	659.56	14.46	342.65	22.07
Porthidium_nasutum	24.28	9.58	7.3	11.1	31.04	17.76	13.28	24.72	24.2	25.51	22.71	2859.61	412.49	93.59	50.44	1105.93	322.15	682.07	575.32
Porthidium_yucatanicum	25.82	11.95	6.64	19.71	34.46	16.61	17.85	27.3	24.69	27.79	22.97	1090.18	187.73	27.05	63.04	491.82	94.21	347.49	117.33
Pristidactylus_scapulatus	8.55	15.16	5.44	46.55	23.13	-4.7	27.83	8.61	8.56	14.53	2.58	254.43	40.33	10.36	45.47	106.26	35.97	58.88	81.99
Pristidactylus_torquatus	11.01	11.72	5.33	35.2	24.09	2.32	21.77	7.17	15.56	15.7	6.62	1521.03	270.47	36.25	69.06	753.41	131.4	133.47	711.41
Pristurus_abdelkuri	26	9.06	6.18	15.62	33.74	19.22	14.52	24.3	27.9	27.9	24	61	21.8	0.2	106	39	2	3.8	18.8
Pristurus_carteri	25.94	10.74	4.75	38.86	36.9	14.51	22.38	24.03	25.77	30.44	20.48	59.61	15.93	0.44	87.68	35.33	3.4	7.71	20.44
Pristurus_celerrimus	25.51	11.38	4.39	52.06	37.91	12.29	25.62	20.13	30.12	31.66	18.47	117.45	37.88	0.22	113.72	77.14	3.4	6.76	64.72
Pristurus_guichardi	25.48	7.77	5.53	19.27	33.06	19.08	13.98	23.44	27.83	27.83	23.16	95.1	21	2.1	61.4	43.3	9.8	9.8	26.1
Pristurus_insignis	25.48	7.77	5.53	19.27	33.06	19.08	13.98	23.44	27.83	27.83	23.16	95.1	21	2.1	61.4	43.3	9.8	9.8	26.1
Pristurus_rupestris	25.48	11.83	5.67	32.63	35.54	14.47	21.07	24.57	26.13	29.21	21.09	142.81	36.01	0.84	94.05	75.24	6.28	35.73	27.43
Pristurus_sokotranus	25.48	7.77	5.53	19.27	33.06	19.08	13.98	23.44	27.83	27.83	23.16	95.1	21	2.1	61.4	43.3	9.8	9.8	26.1
Proablepharus_reginae	22.68	15.07	4.81	56.77	37.51	6.41	31.11	27.75	18.13	29.25	14.89	261.04	49.49	6.34	56.53	125.26	23.98	111.47	33.1
Proctoporus_bolivianus	7.06	13.73	6.83	14.28	15.66	-4.33	19.99	8.21	4.89	8.33	4.86	792.34	155.19	7.34	73.41	400.78	34.56	277.97	36.56
Proctoporus_sucullucu	9.31	16.46	7.35	13.34	19.32	-3.04	22.36	10.18	7.37	10.54	7.22	869.05	162.93	10.05	76.9	452.05	40.25	304.36	43.29
Proctoporus_unsaacae	10.98	16.08	7.48	11.55	20.74	-0.66	21.4	11.56	9.38	12.09	9.22	876.76	163.32	8.71	76.18	444.71	36.74	277.5	41.09
Prosymna_janii	23.09	12.56	6.12	26.6	32.26	11.91	20.35	26.02	19.8	26.04	19.28	750.66	133.93	18.58	64.97	360.77	63.65	359.48	67.96
Prosymna_meleagris	26.5	10.86	6.76	12.68	34.96	18.83	16.13	25.51	26.53	28.22	24.93	1467.95	293.74	7.05	78.04	741.13	39.19	222.99	587.42
Protobothrops_jerdonii	20.38	9.7	3.9	52.74	31.79	6.34	25.45	24.5	14.05	26.28	12.91	1603.78	321.07	19.61	78.08	862.45	79.74	715.86	86.93
Protobothrops_kaulbacki	12.67	11.44	4.37	51.22	23.82	-2.06	25.88	18.64	6.62	18.66	5.6	1551.33	334.22	7.56	91.33	929	33.33	911.89	44.78
Protobothrops_mucrosquamatus	17.18	9.41	3.37	66.24	30.54	2.05	28.49	23.41	9.02	25.08	8.08	1305.39	255.06	19.53	75.72	678.53	74.47	579.92	84.26
Protobothrops_sieversorum	21.59	9.25	5.19	26.42	29.15	11.45	17.7	23.69	18.07	24.37	17.75	2240.23	507.09	14.95	88.86	1291.36	66.14	886.61	75.45
Protobothrops_xiangchengensis	4.44	12.85	4.54	54.58	16.15	-11.84	27.99	10.97	-2.47	10.97	-2.9	778.51	187.46	3.89	98.35	485.4	15.78	485.4	16.4
Psammodromus_algirus	15.89	12.26	3.93	63.02	33.11	2.32	30.79	11	24.04	24.33	8.2	404.01	59.85	4.34	51.03	162.42	25.44	29.49	151.23
Psammodromus_blanci	15.45	10.26	3.57	62.19	31.42	3.16	28.26	9.38	23.57	23.84	7.96	515.3	77.22	5.16	51.55	212.83	32.4	39.73	202.13
Psammodromus_hispanicus	13.84	10.63	3.76	59.47	29.83	1.94	27.89	10.93	20.05	21.77	6.61	577.71	77.59	13.13	41.72	211.5	62.05	68.39	182.19
Psammophis_condanarus	25.66	11.97	4.66	41.38	38.06	11.6	26.47	27.86	22.94	30.46	19.79	1187.49	295.63	3.42	113.19	757.16	22.02	288.7	37.45
Psammophis_subtaeniatus	21.17	14.76	5.78	32.71	32.29	6.91	25.38	23.76	16.54	24.43	16.37	607.27	142.75	1.26	101.23	382.1	5.87	237.66	7.27
Psammophylax_tritaeniatus	21.09	14.1	5.79	29.68	31.92	7.63	24.29	23.3	16.89	24.09	16.74	767.37	175.11	1.15	102.07	479.25	5.3	261.67	7.26
Pseudalsophis_elegans	20.9	10.99	7.08	16.09	28.78	13.2	15.59	22.55	20.18	23	18.93	487.88	114.89	5.09	109.88	297.11	19.24	285.58	25.52
Pseudelaphe_flavirufa	25.4	11.31	6.45	20	33.8	16.38	17.42	26.84	24.51	27.43	22.53	1269.25	216.83	30.45	62.15	562.16	104.99	374.07	152.79
Pseudemoia_pagenstecheri	14.85	12.42	4.88	45.48	28.69	3.44	25.25	12.98	17.21	20.64	8.99	579.6	68.06	29.03	25.28	189.29	97.87	109.09	173.29
Pseudoacontias_menamainty	26.45	10.15	7.3	8.96	32.65	18.85	13.8	26.9	25.05	27.2	25.05	1717.5	454	4	108.5	1121	15	703.5	15
Pseudocalotes_brevipes	22.05	7.71	3.46	52.26	32.07	10.04	22.03	27.65	16.14	27.89	14.74	1549	289.38	27.01	73.29	799.37	98.03	776.74	117.97
Pseudocerastes_fieldi	19.85	13.9	4.05	74.51	37.05	2.98	34.07	11.79	28.65	28.76	9.86	92.14	18.61	0	79.24	46.94	0.03	0.24	43.98
Pseudocerastes_persicus	22.11	13.62	4.24	61.88	38.29	5.67	32.62	20.03	24.29	29.82	13.78	575.75	167.62	1.74	106.51	403.46	10.27	95.57	73.99
Pseudoeryx_plicatilis	24.65	11.28	7.24	11.77	32.42	16.54	15.88	25.1	23.64	25.94	23.01	1808.53	281.3	41.46	58.61	774.14	151.83	382.9	383.49
Pseudoficimia_frontalis	22.33	14.62	6.58	21.6	33.03	10.79	22.23	23.91	21.65	24.88	19.39	1001.9	242.33	3.82	107.17	655	18.12	368.43	44.46
Pseudogekko_compressicorpus	25.77	8.63	7.94	6.26	31.39	20.6	10.79	25.49	25.7	26.46	24.9	2560.29	349.3	100.44	38.25	970.44	340.56	543.17	648.34
Pseudogekko_smaragdinus	26.25	7.7	6.95	11.14	32.05	21.05	11	25.7	25.55	27.45	24.6	3290	503.5	137.5	46	1431	443.5	624.5	911
Pseudogonatodes_manessi	21.82	10.34	7.9	6.27	28.01	14.99	13.02	21.98	21.22	22.43	20.89	1133.11	154.11	25	47.5	437.72	93.39	283.56	143.83
Pseudoleptodeira_latifasciata	24.95	14	6.89	15.04	34.94	14.63	20.31	25.44	24.52	26.85	22.94	1082.84	258.44	2.54	108.24	705.06	12.08	334.26	33.6
Pseudorabdion_oxycephalum	26.17	7.83	7.68	6.33	31.67	21.53	10.14	26.04	26.01	27.01	25.33	2387.82	348.21	53.64	49.72	953.53	194.05	509.11	357.86
Pseudotomodon_trigonatus	14.37	14.73	4.86	55.06	30.14	0.17	29.97	16.63	10.52	21.33	7.24	278.8	42.26	9.39	42.23	112.13	33.81	99.65	39.06
Pseudoxenodon_bambusicola	19.65	8.07	3.21	60.54	31.52	6.35	25.17	24.31	12.91	26.73	11.33	1614.95	282.99	34.62	63.88	767.19	124.87	665.36	154.93
Pseudoxenodon_karlschmidti	19.92	7.76	3.33	55.87	30.83	7.52	23.31	25.52	13.14	26.37	12.16	1488.42	269.81	24.91	70.05	737.92	90.78	696.36	104.76
Pseudoxenodon_macrops	17.95	9.36	3.85	53.39	29.38	4.4	24.98	22.76	11.32	24.17	10.55	1509.88	297.26	19.56	75.73	794.46	75.27	665.59	87.88
Pseudoxyrhopus_ambreensis	20.9	12.3	7.1	17.23	29	11.8	17.2	22.5	18.5	22.5	18.4	1546	342	13	99	936	41	936	48
Psilophthalmus_paeminosus	25.4	12.73	7.18	12.5	33.83	16.25	17.58	25.9	24.28	26.63	23.5	620.75	105.25	2	79	300	13.75	137.25	40.25
Psomophis_obtusus	18.81	11.93	4.9	42.47	31.79	7.64	24.16	21.24	15.64	24.25	13.47	1276.22	144.32	69.48	22.85	387.39	232.57	342.92	243.88
Ptychozoon_lionotum	25.36	10.17	5.46	20.35	34.17	15.22	18.95	26.03	23.08	27.59	22.37	1742.36	352.84	6.42	83.7	943.17	35.18	417.31	78.35
Ptyodactylus_oudrii	18.84	14.14	3.88	74.08	38.48	2.43	36.05	16.11	27	28.73	9.61	149.91	21.56	2.63	49.76	56.29	15.11	16.58	43.16
Pygomeles_braconnieri	24.1	12.85	6.3	26.63	33.14	12.93	20.21	27.16	20.68	27.16	20.42	461.37	115	3.67	99.22	302.59	16.48	297.67	18.44
Python_brongersmai	25.65	9.14	8.49	4.33	31.22	20.48	10.74	25.31	25.61	26.16	25.06	2518.66	333.15	110.28	34.26	898.47	376.19	593.87	722.3
Python_curtus	23.93	9.61	8.84	3.11	29.41	18.62	10.8	23.71	23.82	24.34	23.57	2977.35	343.29	146.1	26.81	976.97	490.51	772.71	718.84
Python_regius	25.84	12.09	6.86	13.45	34.97	16.98	17.99	24.94	25.37	27.7	24.29	1402.37	267.74	14.91	80.11	693.41	63.78	235.86	422.28
Quedenfeldtia_moerens	15.39	13.63	4.5	54.43	31.31	1.08	30.23	10.32	22.27	22.58	8.49	296.36	46.42	2.52	64.89	126.06	13.21	17.93	112.5
Quedenfeldtia_trachyblepharus	12.12	16.13	4.46	64.05	31.89	-3.91	35.8	6.06	20.52	20.69	4.29	530.5	74.21	4.86	55.79	204.43	27.21	34.29	189.29
Ramphotyphlops_lineatus	25.49	8.59	8.72	3.37	30.56	20.72	9.84	25.27	25.43	25.84	25.02	2800.59	340.19	137.77	28.98	934.56	458.91	671.77	756.36
Rankinia_diemensis	12.74	11.52	4.8	43.41	25.32	1.48	23.84	13.33	12.91	18.2	7.07	961.41	117.79	48.83	24.89	320.37	165.08	230.84	252.22
Regina_alleni	21.42	12.11	4.84	47.6	32.89	7.95	24.94	27.02	17.39	27.08	14.98	1324.12	197.1	52.11	45.24	542.84	185.11	529.2	225.04
Regina_rigida	18.51	12.63	4.05	66.7	33.27	2.39	30.88	20.68	18.71	26.7	9.55	1335.64	155.1	71.86	22.14	421.7	253.33	375.86	329.37
Regina_septemvittata	12.62	12.36	3.51	82.07	30.04	-4.98	35.02	16.32	7.81	22.83	1.65	1174.84	126.52	68.42	17.5	349.6	231.58	315.66	278.08
Rena_dulcis	18.97	15.24	4.66	63.4	35.2	2.44	32.77	22.89	16.43	26.89	10.7	455.55	84.97	12.29	65.06	207.62	47.65	160.01	78.6
Rhabdophis_nuchalis	10.88	10.59	3.76	61.19	23.64	-4.39	28.02	17.77	2.76	18.23	2.51	1007.8	198.71	10.47	81.72	543.1	39.37	528.58	40.31
Rhabdophis_subminiatus	22.15	9.37	5.54	31.02	30.91	11.78	19.13	24.45	18.46	25.63	17.76	1961.17	337.37	46.76	66.69	910.19	164.68	649.94	257.3
Rhachidelus_brazili	21.81	11.76	6.28	22.71	30.69	11.89	18.8	23.04	20.18	24.3	18.66	1486.18	218.21	47.96	46.83	590.22	170.28	429.73	210.07
Rhacodactylus_auriculatus	21.73	7.33	5.36	22.93	28.31	14.74	13.56	24.6	20.06	24.6	18.7	1525.25	220.31	65.47	42.47	622.84	210.19	622.84	243.09
Rhacodactylus_leachianus	21.51	7.31	5.35	22.83	28.08	14.53	13.55	24.36	19.78	24.36	18.48	1694.44	247.51	71.22	43.32	707.17	227.88	707.17	261.32
Rhacodactylus_trachyrhynchus	21.66	7.32	5.37	22.54	28.15	14.65	13.5	24.47	19.55	24.47	18.66	1745.9	261.9	73.8	44.5	740.6	233.6	740.6	265.2
Rhadinaea_flavilata	19.74	12.29	4.45	56.65	32.67	5.04	27.64	25.81	16.1	26.61	12.13	1332.25	179.76	60.87	35.64	498.99	217.74	490.55	268.77
Rhadinaea_fulvivittis	16.95	14.48	6.87	15.92	27.27	6.37	20.91	17.68	15.52	18.86	14.71	1109.46	223.86	14.48	86.8	593.89	51.02	304.23	83.91
Rhampholeon_acuminatus	21.05	12.05	7.1	16.53	29	12.2	16.8	21.95	18.7	22.8	18.7	1041	200.5	13	68	476.5	52.5	360.5	52.5
Rhampholeon_beraduccii	22.55	8.35	5.75	17.01	29.4	15	14.4	23.4	20.55	24.3	19.95	1615.5	356.5	7.5	93.5	900.5	27.5	563	29
Rhampholeon_boulengeri	22.5	11.05	8.55	4.07	29.1	16.23	12.87	22.27	22.39	22.95	21.94	1692.13	205.37	57.97	34.65	568.49	213.22	431.33	356.81
Rhampholeon_chapmanorum	24.1	12.7	5.9	26.41	34.5	13.2	21.3	26.2	21.7	26.8	20.2	1005	206	11	89	585	45	319	56
Rhampholeon_marshalli	18.5	11.13	5.87	26.72	26.8	7.9	18.9	21	15.37	21	14.5	1394.33	298	17	89.33	820	59.67	820	63
Rhampholeon_moyeri	19.2	11.25	6.75	14.7	27.15	10.65	16.5	20.15	17.45	20.7	17.05	1020	210	2.5	89.5	542.5	16	411.5	19
Rhampholeon_nchisiensis	22.7	12.3	6.2	21.97	32.5	12.95	19.55	24.4	20.6	24.9	19.45	1506	278	21.5	77.5	780	93.5	425.5	120.5
Rhampholeon_platyceps	20.25	11.1	6.1	21.63	29.13	11.05	18.08	21.88	18.05	22.35	17	1769.25	318.75	23.25	77.75	919	101.25	483.25	134.25
Rhampholeon_spectrum	24.61	9.91	7.48	8.72	31.47	18.19	13.28	24.23	24.14	25.65	23.43	1747.95	281.75	22.46	59.07	726.33	100.19	428.16	424.49
Rhampholeon_spinosus	17.5	10.3	6.3	18.3	26.2	10	16.2	18.1	15.1	19.6	15	848	161	17	63	400	61	254	70
Rhampholeon_temporalis	23.45	9.8	6.4	16.91	31.5	16.35	15.15	24.25	23.35	25.5	21.2	1376	244	50.5	56	613.5	195	241.5	209
Rhampholeon_uluguruensis	22.81	10.24	6.6	17.75	29.86	14.41	15.44	24.04	20.21	24.69	20.21	1396	304.71	21	71.86	669.43	77.29	448.14	77.29
Rhampholeon_viridis	19.1	10.8	6.7	17.4	27.6	11.5	16.1	20.4	16.6	21.1	16.6	976	186	6	76	434	31	344	31
Rhinechis_scalaris	13.67	10.47	3.78	58.48	29.36	1.94	27.42	10.8	19.86	21.46	6.55	616.28	82.24	14.93	40.76	224.23	68.53	74.98	195.63
Rhineura_floridana	21.1	12.54	4.8	49.86	32.95	7.07	25.88	26.98	17.41	27	14.34	1283.65	190.16	51.34	44.81	535.4	184.75	530.32	234.41
Rhinocheilus_lecontei	17.18	15.73	4.64	65.96	34.39	0.25	34.14	20.91	14.59	25.48	8.63	422.28	79.52	9.66	63.03	199.38	37.93	154.11	68.45
Rhinophis_drummondhayi	22.8	8.8	7.22	8.51	29.27	17.12	12.15	22.23	22.92	23.78	21.58	2412.5	340.88	85.62	41.79	921.17	316.71	562.38	611.5
Rhinophis_oxyrhynchus	27.22	7.27	6.58	13.63	32.76	21.8	10.96	25.89	28.44	28.6	25.25	1521.13	339.66	15.16	80.94	854.81	102.8	162.75	604.31
Rhinophis_travancoricus	26.1	7.35	6.6	9.48	31.9	20.85	11.05	25.6	25.9	27.6	25.15	2736.5	540	22.5	72	1370	118.5	479.5	744.5
Rhinoplocephalus_bicolor	15.97	10.81	5.33	32.96	27.08	7.01	20.08	12.2	20.08	20.2	11.85	693.58	109.49	18.79	50.88	302.8	64.65	69.43	299.2
Rieppeleon_brachyurus	24.05	10.03	6.28	17.39	31.61	15.7	15.91	25.11	21.67	25.92	21.52	1132.5	250.82	5.66	96.85	674.26	22.17	345.15	23.77
Rieppeleon_brevicaudatus	24.26	9.31	6.5	15.15	30.94	16.77	14.18	25.17	22.37	25.91	22.09	1100.11	226.13	11.34	78.77	567.4	45.04	357.97	49.29
Rieppeleon_kerstenii	25.34	12.93	7.32	12.51	34.29	16.75	17.55	26.23	24.25	26.78	23.64	447.26	114.7	3.38	102.51	228.26	16.93	153.59	33.32
Ristella_rurkii	21.27	7.93	6.2	12.81	27.63	14.87	12.77	21.07	20.5	22.87	19.43	1483.33	231.67	26	53	553.67	97.67	356.33	294.33
Saara_loricata	22.87	14.42	3.76	84.84	42.72	5.05	37.68	12.78	32.99	33.31	11.67	256.03	59.28	0	97.62	149.6	0.36	0.38	140.57
Salea_horsfieldii	15.77	9.4	5.93	12.81	23.07	7.33	15.73	15.93	14.93	17.4	14.07	1865.33	394.33	22.33	69.67	876	82.67	339.33	206.33
Saltuarius_cornutus	21.99	10.25	5.62	27.3	30.28	12.15	18.13	24.61	19.21	24.97	18.06	1596.12	334.98	26.65	86.23	944.44	86.67	760.42	107.75
Salvadora_mexicana	24.37	13.62	6.96	15.69	33.65	14.12	19.54	25.43	23.53	26.17	22.19	1182.3	293.85	2.95	110.26	788.99	14.58	468.08	38.84
Salvator_merianae	23.08	11.67	6.68	19.2	32.37	14	18.37	24.28	21.26	25.39	20.56	1725.23	252.58	46.18	50.07	699.96	164.05	376.66	347.4
Sanzinia_madagascariensis	23.46	11.64	6.46	22.21	31.52	13.66	17.87	25.69	20.91	25.78	20.27	1471.03	311.08	27.02	89.79	817.51	103.13	712.07	133.53
Saproscincus_czechurai	22.93	9.2	5.56	25.55	30.4	13.96	16.44	25.48	20.99	25.75	19.26	2497	494.29	50.74	80.23	1398.74	160.77	1117.16	204.97
Saurodactylus_fasciatus	18.18	12.98	4.33	55.78	34.8	5.14	29.66	12.09	25.4	25.64	11.29	601.86	101.88	0.74	70.59	273.57	12.13	13.83	268.84
Saurodactylus_mauritanicus	16.5	9.09	3.42	59.16	31.01	4.76	26.26	10.52	24.22	24.55	9.45	399.16	59.08	2.54	55.91	164.72	19.83	25.52	155.44
Sauromalus_ater	18.37	15.84	4.53	70.28	36.89	1.86	35.03	19.52	21.35	27.61	9.72	192.52	32.99	2.99	55.13	80.57	15.45	60.46	60.28
Sauromalus_hispidus	20.55	16.72	5.62	48.1	35.65	6.28	29.37	14.87	21.32	27.05	14.57	103.67	18.17	0	63.5	42.17	1.67	36.5	41.83
Scaphiodontophis_annulatus	24.4	10.73	6.48	17.57	32.5	16.07	16.44	25.44	23.64	26.27	21.87	1844.16	319.67	37.95	66.96	835.96	133.64	465.7	224.19
Scelarcis_perspicillata	14.54	13.66	4.09	62.87	32.85	0.11	32.75	9.51	22.87	23.02	6.91	463.18	68.17	4.81	54.18	183.66	24.77	28.34	169
Sceloporus_adleri	20.13	12.03	6.86	11.62	29.34	11.93	17.41	19.95	20.64	21.73	18.72	1339.93	302.29	5.36	103.79	826.36	22.79	297.93	45.57
Sceloporus_aeneus	15.32	15.24	6.69	18.66	26.36	3.72	22.64	16.47	14.19	17.47	12.67	969.57	208.68	7.72	94.72	579.81	33.19	263.58	41.02
Sceloporus_angustus	23	14.7	5.6	45.5	35.7	9.7	26	29.1	23.5	29.1	17.5	201	52	0	103	131	3	131	39
Sceloporus_arenicolus	16.2	16.8	4.42	76	34.19	-3.39	37.58	24.41	7.54	25.75	6.18	373.42	65.51	9.3	61.36	169.97	33.56	154.33	34.58
Sceloporus_bicanthalis	13.69	15.57	7.02	17.38	24.35	2.32	22.02	14.87	11.37	15.59	11.2	755.09	144.07	10.09	78.67	385.83	35.56	247.67	43.17
Sceloporus_bulleri	22.29	14.04	6.19	26.68	32.86	10.38	22.48	24.76	21.72	25.22	18.55	1069.63	271.85	5.34	106.94	726.63	25.4	536.28	83.15
Sceloporus_carinatus	23.4	13.79	6.96	14.66	33.04	13.38	19.66	24.24	21.65	25.07	21.34	1186.26	252.69	5.07	97.45	665.48	18.9	349.6	34.98
Sceloporus_cautus	17.6	16.43	6.33	32.55	30.1	4.3	25.8	20.67	14.7	21.18	13.02	431.08	73.01	10.1	59.19	189.83	42.23	171.48	49.06
Sceloporus_chaneyi	16.45	15.55	6.43	28.55	27.93	3.88	24.05	19	13.2	19.5	12.35	549	98.25	13.25	61.75	236.25	53.25	217.25	54.75
Sceloporus_chrysostictus	25.69	11.35	6.5	19.44	34.1	16.77	17.33	27.03	24.99	27.67	22.89	1248.11	212.36	29.97	61.47	550.96	103.26	358.09	149.03
Sceloporus_clarkii	19.13	16.6	5.22	56.84	35.03	3.16	31.87	25.42	20.18	26.26	11.89	535.93	132.42	5.46	87.12	324.76	26.48	272.11	88.41
Sceloporus_cozumelae	25.81	9.76	6.58	17.91	32.77	18.07	14.7	27.2	24.98	27.64	23.21	1021.64	171	26.45	55.73	430.18	100.45	336.82	160.45
Sceloporus_cryptus	15.08	13.2	6.95	13.23	24.6	5.73	18.88	15.48	14.38	16.75	13.25	1375.5	256.25	17.5	83.25	724	61.5	310.5	118
Sceloporus_dugesii	18.84	15.7	6.34	22.73	30.86	6.29	24.56	20.62	18.16	21.4	15.58	913.86	225.55	5.23	106.14	593.8	21.57	336.74	40.49
Sceloporus_edwardtaylori	25.48	11.54	6.9	13.46	33.57	16.98	16.59	26.21	24.24	26.98	23.59	1039.81	243.76	4.19	104.38	612.41	16.27	279.22	21.41
Sceloporus_formosus	16.8	14.84	7.03	14.15	27.12	6.18	20.94	17.44	15.47	18.52	14.82	1081.6	226.1	11.4	89.56	598.49	42.12	317.26	60.31
Sceloporus_gadoviae	23.02	16.37	6.72	19.19	35.02	10.83	24.19	23.74	21.32	25.47	20.45	889.32	194.2	3.04	100.9	523.64	15.32	252.54	28.9
Sceloporus_goldmani	17.9	18.2	6.4	36.07	31.8	3.6	28.2	22	14.1	22	12.9	338	51	6	55	139	36	139	41
Sceloporus_graciosus	8.1	15.75	4.02	79.84	29.74	-9.25	38.99	7.33	10.4	18.6	-1.88	392.73	57.52	12.68	37.7	156.67	47.82	71.25	124.24
Sceloporus_grammicus	18.72	15.33	5.94	34.51	31.08	5.26	25.82	21.66	16.06	22.63	13.9	662.98	142.22	8.99	82.3	364.95	36.72	247.71	52.95
Sceloporus_grandaevus	23.32	14.48	5.52	46.61	35.66	9.7	25.96	29.26	24.26	29.26	17.52	253	66.6	0	108	174.8	1.8	174.8	32.8
Sceloporus_heterolepis	19.89	14.93	6.48	19.43	31.12	8.24	22.88	21.25	19.21	22.1	17.1	1000.67	235.73	5.06	103.42	636.47	20.69	370.82	44.13
Sceloporus_horridus	22.5	15.1	6.38	26.3	33.86	10.16	23.7	24.74	21.79	25.57	18.92	921.82	231.33	4	106.85	609.24	19.16	398.67	58.13
Sceloporus_hunsakeri	22.38	13.82	5.61	41.54	33.67	9.28	24.39	27	22.27	27.62	17.13	338.29	108.41	0.47	120.18	241.47	3.35	238.18	37.06
Sceloporus_insignis	23.18	13.84	6.6	16.04	33.27	12.44	20.83	24.11	22.61	25.04	20.85	1020.33	229.2	3.23	104.97	653.57	12.97	352.9	37.37
Sceloporus_jalapae	16.77	16.07	7.03	16.71	27.79	5.09	22.69	17.81	14.66	18.69	14.37	699	150.96	6.13	88.57	370.59	24.16	249.75	30.77
Sceloporus_licki	21.18	13.82	5.76	39.59	32.42	8.63	23.79	26.16	20.92	26.26	16.23	387.55	120.18	0.64	121.64	280.91	4.27	280.64	42.36
Sceloporus_lineatulus	23.8	14.35	5.4	47.71	36.5	10.2	26.3	30.1	24.3	30.1	17.9	169.5	42	1	85.5	97.5	6	97.5	41
Sceloporus_lundelli	25.74	11.7	6.55	19.73	34.32	16.6	17.72	27.16	24.94	27.74	22.9	1151.11	199.09	27.97	62.55	517.68	96.26	342.81	127.56
Sceloporus_macdougalli	25.64	13.63	7.71	10.13	33.95	16.39	17.56	26.37	24.63	26.7	24.22	1076.68	246.6	2.2	105.36	637.32	12.2	354.64	19.84
Sceloporus_maculosus	20.56	17.47	5.74	44.98	34.77	4.57	30.2	24.61	18.76	25.59	14.35	288.8	66.2	3.2	88.27	175.13	13.87	120.33	24.53
Sceloporus_magister	15.89	16.4	4.53	71.31	34.62	-1.48	36.09	19.74	16.83	25.06	6.88	268.35	50.43	5.8	59.01	127.91	24.92	102.39	57.2
Sceloporus_malachiticus	21.77	11.36	7.25	10.02	29.82	14.2	15.62	21.95	21.13	22.98	20.39	1733.38	309.72	16.36	77.45	802.92	62.56	378.98	167.78
Sceloporus_megalepidurus	14.04	14.49	6.96	16.99	24.13	3.52	20.61	15.13	12.08	15.91	11.6	859.21	168.08	16.21	77.79	429.67	53	255.92	66.62
Sceloporus_melanorhinus	25.08	13.57	7.01	14.65	34.41	15.11	19.3	25.81	24.43	26.84	23.1	1233.97	292.02	4.36	106.63	778.84	19.04	408.02	41.23
Sceloporus_merriami	18.57	15.86	4.7	64.51	34.29	0.8	33.49	24.64	12.08	26.32	9.84	348.88	64.9	8.06	67.69	168.98	30.68	144.39	35.47
Sceloporus_minor	18	16.45	6.41	29.32	30.32	4.84	25.48	20.59	15.47	21.16	13.86	496.74	93.84	9.05	70.14	242.45	37.43	188.84	44.07
Sceloporus_mucronatus	15.39	15.63	6.98	16.63	26.09	3.88	22.21	16.44	13.36	17.28	13.03	895.76	181.64	8.86	87.05	495.57	33.7	271.44	42.88
Sceloporus_nelsoni	22.89	14.98	6	33.91	34.52	9.68	24.84	26.36	22.07	26.75	18.31	910.07	246.38	4.35	111.52	642.8	21.31	509.16	74.38
Sceloporus_occidentalis	9.51	15.31	4.31	69.64	29.73	-5.79	35.52	4.04	15.94	18.73	0.98	509.12	80.5	10.38	46.52	224.02	43.48	52.79	208.99
Sceloporus_ochoterenae	23.38	15.56	6.7	17.94	35.07	12.03	23.04	23.86	21.8	25.74	21.03	965.89	207.29	2.95	104.45	590.61	16.39	233.58	25.89
Sceloporus_olivaceus	19.97	13.61	4.38	62.29	34.79	3.56	31.23	24.38	13.76	27.44	11.47	660.2	106.48	24.65	48.52	250.59	90.99	196.25	97.17
Sceloporus_orcutti	18.17	15.81	5.56	46.47	33.33	5.04	28.29	15.88	20.02	24.65	12.72	224.33	43.4	0.62	75.26	115.22	7.48	52.7	95.6
Sceloporus_ornatus	19.23	16	5.39	49.71	33.48	4	29.48	24.02	15.8	24.91	12.39	326.17	60.33	6	70.33	164.75	25.67	148.17	33.58
Sceloporus_palaciosi	12.15	15.05	7	15.47	22.28	0.88	21.4	13.2	9.95	13.9	9.95	1207	251.5	9.5	95.5	716.25	40	340.25	40
Sceloporus_parvus	19.15	15.54	5.93	36.12	31.77	5.52	26.26	22.29	15.53	23.16	14.1	512.99	101.83	10.15	69.18	246.46	40.27	187.51	45.44
Sceloporus_poinsettii	17.35	16.33	5.05	57.74	32.92	0.61	32.32	22.91	13.16	24.32	9.6	433.76	92	8.67	77.45	235.31	33.63	196.75	49.14
Sceloporus_pyrocephalus	24.41	13.85	6.8	15.31	34.2	13.94	20.26	25.04	23.75	26.26	22.31	1057.24	250.52	2.53	107.99	694.16	11.59	350.39	34.95
Sceloporus_samcolemani	18.12	14.62	5.64	40.16	30.53	4.66	25.87	21.83	13.6	22.75	12.59	446.12	83.78	11.6	60.48	203.61	44.27	173.26	49.83
Sceloporus_scalaris	17.32	15.53	6.4	24.24	29.02	4.92	24.11	19.21	15.96	20.04	13.9	805.16	184.16	7.14	95.08	486.39	29.72	287.34	49.66
Sceloporus_serrifer	22.81	12.39	5.51	36.74	33.71	10.69	23.02	25.77	19.17	26.9	17.64	965.19	178.26	21.54	65.21	433.23	80.29	314.22	104.64
Sceloporus_siniferus	23.85	13.86	7.15	12.63	33.28	13.94	19.34	24.32	23.1	25.39	22.12	1157.43	269.03	3.98	104.35	712.44	16.46	336.88	32.34
Sceloporus_slevini	15.01	17.41	5.45	51.57	30.94	-0.98	31.92	20.55	14.53	21.34	8.28	609.66	152.23	7.58	93.61	381.56	33.19	327.24	82.53
Sceloporus_smaragdinus	16.96	11.29	7.32	9.67	24.27	8.89	15.38	17.53	15.68	17.95	15.52	1660.16	331.11	7.42	87.39	807.92	30.26	518.97	42.47
Sceloporus_smithi	23.54	11.92	7.16	12.04	31.57	15.05	16.52	24.28	22.45	24.89	21.87	1037.33	231.59	5.21	101.56	599.13	20.38	304.74	27.03
Sceloporus_spinosus	17.26	16.05	6.55	24.28	29.04	4.67	24.37	19.15	15.22	19.94	13.82	676.05	143.86	8.18	86.35	377.1	31.78	230.45	39.66
Sceloporus_squamosus	24.87	11.5	7.4	8.7	32.84	17.4	15.45	24.78	24.31	26.02	23.76	1790.35	365.39	5.36	90.66	919.56	22.66	299.35	172.75
Sceloporus_stejnegeri	22.76	12.89	7.18	10.69	31.77	13.95	17.83	22.77	22.95	24.2	21.39	1456.18	331.18	5	106.09	917.73	23.64	334.82	43
Sceloporus_subpictus	17.55	16.9	7.35	13.31	28.43	5.53	22.9	18.2	15.65	19.15	15.63	1304	266.75	9	94.5	748.25	44	391.5	48
Sceloporus_taeniocnemis	18.37	12.07	7.35	10.72	26.38	10.05	16.33	19.1	17.75	19.49	16.78	2092.84	342.52	49.78	64.26	905.48	168.84	570.86	219.4
Sceloporus_teapensis	24.9	9.98	6.31	17.99	32.78	17.07	15.71	25.9	24.75	26.8	22.31	2285.92	384.73	54.19	59.72	1013.08	188.65	527.08	318.88
Sceloporus_torquatus	17.07	16.11	6.48	24.52	29.08	4.33	24.75	19.01	15.56	19.82	13.59	705.55	159.29	6.7	92.92	421.98	27.27	247.49	41.31
Sceloporus_undulatus	14.51	14.47	4.01	76.79	32.38	-3.56	35.94	19.7	10.01	24.16	4.37	805.04	104.5	38.93	40.02	278.27	134.61	239.08	163.21
Sceloporus_utiformis	22.93	14.22	6.59	19.75	33.27	11.76	21.52	24.32	22.25	25.21	20.2	1035.9	259.14	3.42	108.94	695.15	16.52	434.8	45.85
Sceloporus_variabilis	22.63	11.93	5.78	32.72	33.07	11.43	21.64	25.04	19.59	26.36	18.05	1222.62	215.48	24.9	63.64	544.73	91.16	330.22	158.76
Sceloporus_virgatus	14.98	17.92	5.43	53.06	31.38	-1.48	32.86	20.87	14.75	21.57	8.14	629.55	163.99	8.16	93.62	394.41	36.32	353.69	91.25
Sceloporus_woodi	22.26	11.28	4.91	42.02	32.68	9.9	22.78	27.13	17.94	27.2	16.54	1321.86	196.75	49.82	47.57	543.68	174.43	532.6	191.89
Sceloporus_zosteromus	20.24	15.45	5.84	40.85	33.92	7.68	26.23	20.93	20.61	25.96	15.41	164.64	37.63	0.16	82.4	91.9	2.79	72.2	53.16
Scincella_gemmingeri	16.95	14.15	6.64	19.82	27.37	6.17	21.2	18.14	14.95	19.19	14.18	1101.92	221.61	18.69	79.08	565.44	65.19	285.33	88.97
Scincella_lateralis	16.44	12.85	3.8	75.08	32.83	-0.91	33.74	18.91	13.88	25.74	6.36	1186.11	139.25	63.77	23.95	374.29	219.84	317.93	269.22
Scincopus_fasciatus	27.67	15.44	5.62	35.54	40.34	13.04	27.3	29.09	24.13	31.78	22.55	248.09	97.78	0.01	156.02	207.59	0.07	39.73	0.2
Seminatrix_pygaea	19.83	12.32	4.48	56.2	32.74	5.22	27.53	26.36	15.94	26.66	12.3	1310.59	180.21	59.32	36.52	497.26	208.06	488.44	256.62
Senticolis_triaspis	22.08	13.58	6.34	25.92	32.69	11.01	21.68	24.26	21.4	25.08	18.55	1230.01	252.1	17.22	87.26	653.51	63.71	382.22	129.57
Sibynomorphus_ventrimaculatus	19.34	11.53	4.97	39.92	31.61	8.59	23.02	20.42	17.4	24.41	14.32	1394.77	148.59	81.9	17.44	406.51	274.44	358.05	291.55
Sibynophis_bistrigatus	26.59	11.26	4.77	25.6	37.87	14.47	23.4	27.04	24.53	29.56	22.89	1707.86	372.93	1.45	93.97	1034.2	10.18	260.75	14.21
Sibynophis_chinensis	16.53	8.63	3.2	66.39	29.65	2.21	27.43	22.75	8.49	24.57	7.53	1316.1	238.93	25.45	67.78	639.7	93.27	581.81	105.88
Sibynophis_collaris	22.25	10.23	5.23	28.77	31.06	11.04	20.01	24.42	18.79	25.36	18.08	1788.88	371.03	14.48	84.07	982.61	62.54	649.24	104.52
Sibynophis_triangularis	25.43	9	6.13	11.96	32.67	18.1	14.57	25.4	23.97	26.93	23.77	1892	333.33	7	77.33	938.67	45	418	115
Sigaloseps_deplanchei	21.21	7.41	5.28	24.02	28.04	14.12	13.93	24.22	20.12	24.22	18.03	1674.31	224.25	75.81	36.44	637.31	242.25	637.31	284.88
Sigaloseps_ruficauda	20.75	7.47	5.27	24.2	27.68	13.65	14.03	23.8	19.83	23.8	17.55	1723.33	228.17	79.33	35.67	653.5	251.67	653.5	295.83
Simiscincus_aurantiacus	21.35	7	5.15	23.89	27.98	14.48	13.5	24.35	20.43	24.35	18.18	1920.25	251.5	87.25	34	698.25	280	698.25	334.25
Sinomicrurus_japonicus	21.59	5.53	2.91	46.32	30.73	12.03	18.7	25.07	15.6	27.39	15.6	2417.43	327.29	124.71	30.57	822.86	403.86	703.43	403.86
Sinomicrurus_kelloggi	18.69	8.47	3.43	58.47	30.38	5.4	24.98	23.47	11.82	25.51	10.62	1481.08	268.69	29.07	67.77	727.02	106.43	645.88	126.4
Sinonatrix_aequifasciata	18.51	8.15	3.25	61.35	30.73	5.15	25.57	23.36	11.31	25.79	10.11	1530.88	276.21	30.49	65.8	743.64	112.02	628.88	132.82
Sinonatrix_percarinata	19.31	9.37	3.92	50.33	30.53	6.12	24.42	23.36	13.37	25.12	12.31	1539.94	297.6	21.88	74.4	799.83	83.16	639.36	98.21
Siphlophis_compressus	25.34	10.36	7.78	6.33	32.15	18.74	13.41	25.2	25.17	26.05	24.47	2112.93	315.05	56.47	54.97	869.37	203.21	388.98	545.77
Siphlophis_pulcher	20.4	11.4	6.32	20.74	28.55	10.65	17.9	22.44	17.67	22.73	17.49	1344.96	244.1	26.46	68.54	658.44	92.64	542.04	102.26
Sistrurus_catenatus	12.55	13.08	3.37	89.79	31.6	-6.93	38.53	20.92	1.67	23.71	0.51	767.4	100.91	30.69	38.67	269.12	109.35	243.91	113.53
Sistrurus_miliarius	17.73	12.81	4.01	69.26	33.09	1.2	31.89	18.77	17.17	26.28	8.44	1304.09	154.05	69.34	23.53	417.17	242.01	355.59	311.62
Sitana_ponticeriana	23.34	12.38	4.33	51.78	37.45	8.26	29.19	25.33	20.85	29.59	16.22	855.54	243.58	4.22	109.96	588.73	24.24	190.2	80.1
Sonora_semiannulata	17.24	15.37	4.37	70.79	34.77	-0.37	35.14	21.69	12.96	26.14	7.99	450.11	75.87	13.56	56.92	187.98	51.21	150.97	67.47
Spalerosophis_microlepis	16.93	14.51	3.78	82.66	37	-0.91	37.91	7.73	26.73	27.32	6.11	275.31	59.68	0.24	92.64	151.65	2.02	2.87	141.89
Sphaerodactylus_glaucus	25.39	10.38	6.37	18.1	33.38	17.21	16.16	26.47	25.02	27.29	22.78	1753.38	304.05	38.75	64.7	792.7	134.42	434.45	223.54
Sphaerodactylus_goniorhynchus	24.33	7.13	6.9	9.72	29.47	19.19	10.28	24.94	23.13	25.43	22.96	2015.87	299.6	66.07	44.53	767.6	237.4	590.93	246.4
Sphaerodactylus_klauberi	23.39	10.17	7.4	12.23	29.86	16.2	13.66	24.5	21.68	24.73	21.67	1985.36	250.91	75.36	35.18	694.18	261.82	589.82	263.27
Sphaerodactylus_molei	25.57	8.74	7.93	5.71	31.16	20.19	10.97	25.56	25.31	26.19	24.76	1823.93	260.36	64.01	42.92	690.35	229.79	413.22	326.69
Sphaerodactylus_nicholsi	24.4	10.4	7.5	12.02	30.9	17.1	13.8	25.6	22.8	25.7	22.8	1337	216	39	50	577	132	380	132
Sphaerodactylus_notatus	24.97	9.94	6.23	20.02	32.51	16.66	15.85	26.75	22.25	27.28	22.15	1311.81	207.83	31.14	58.56	533.78	113.15	474.79	117.49
Sphaerodactylus_richardi	25.11	11.03	6.55	19.53	32.86	16.14	16.72	27.17	22.39	27.33	22.39	1238.21	206.07	15.93	67	542.5	76.93	532.43	76.93
Sphaerodactylus_thompsoni	22.14	11.8	7.54	11.86	29.52	13.98	15.54	23.28	20.5	23.54	20.46	1276.2	210.6	29.8	57.4	541.8	107.8	418.6	107.8
Sphaerodactylus_torrei	26	9.25	6.65	14.91	32.75	18.9	13.85	27.25	23.95	27.75	23.95	834.5	168.5	28	59.5	361.5	89	198.5	89
Sphaerodactylus_vincenti	24.51	7.34	7.36	9.38	29.24	19.33	9.91	25.09	23.6	25.43	23.13	2353.29	301.29	94.14	36.86	833.14	314.14	757	334.29
Sphenomorphus_acutus	25.12	9.06	8.29	4.96	30.75	19.9	10.85	24.83	25.16	25.65	24.43	2642.2	347.81	122.4	33.1	948.64	404.52	583.92	722.96
Sphenomorphus_concinnatus	25.38	7.02	8.44	4.24	29.62	21.34	8.27	25.6	25.22	25.79	24.73	3331.46	396.99	203.67	22.41	1099.92	671.02	952.67	777.89
Sphenomorphus_cranei	25.34	7.02	8.45	4.23	29.58	21.32	8.26	25.54	25.16	25.75	24.69	3294.98	396.13	200.79	23.11	1096.64	661.1	934.33	759.57
Sphenomorphus_cyanolaemus	24.82	8.19	8.91	2.94	29.58	20.43	9.15	24.62	24.81	25.16	24.41	3112.91	346.52	172.1	20.67	971.31	580.94	743.86	845.1
Sphenomorphus_diwata	22.4	8.3	8.2	5.84	27.5	17.4	10.1	21.5	22.7	22.9	21.5	3564	498	212	32	1339	656	703	1339
Sphenomorphus_fasciatus	25.12	9.07	8.29	4.94	30.75	19.89	10.86	24.83	25.16	25.65	24.44	2636.28	346.72	122.08	33.08	945.73	403.46	583.77	718.33
Spondylurus_sloanii	26.23	6.65	6.63	11.52	31.08	21.13	9.95	26.88	24.65	27.53	24.65	1126	148	45.25	36.25	422.5	159.25	309.5	159.25
Stellagama_stellio	14.96	12.23	3.74	73.01	32.51	0.09	32.42	7.26	23.94	24.13	5.49	435.22	75.73	5.47	69.01	202.27	21.45	28.25	197.45
Stenocercus_angel	11.87	10.03	8.83	3.21	17.51	6.21	11.29	12.04	11.43	12.11	11.34	1046.81	126.25	45.19	30.62	338.06	158.38	321.62	168.69
Stenocercus_boettgeri	25.24	11.38	8.26	4.14	31.84	18.14	13.7	25.36	24.56	25.58	24.56	2578.6	369.8	95.4	43.2	999	302.6	656	302.6
Stenocercus_chrysopygus	7.04	14.43	7.72	8.09	15.16	-3.43	18.59	7.74	5.81	7.84	5.81	779.46	140.33	8.15	67.37	365.72	33.15	336.35	33.15
Stenocercus_crassicaudatus	20.41	14.75	7.92	7.1	29.35	10.83	18.52	20.33	19.52	21.17	19.52	1452.27	214.11	29.54	56.03	625.35	116.89	419.89	116.95
Stenocercus_cupreus	20.44	13.78	8.54	5.18	27.97	11.83	16.15	20.67	19.73	21	19.67	1583.45	203.64	64.18	41.73	574.36	200.73	525.55	208.45
Stenocercus_festae	12.95	9.98	8.62	4.1	18.95	7.44	11.52	13.05	12.52	13.28	12.29	955.11	134.3	36.65	41.7	373.57	130.46	236.02	195.87
Stenocercus_imitator	19.04	12.34	8.42	7.91	26.28	11.69	14.59	19.91	18.02	20.03	18	545.89	160.56	7.22	101.67	331	29.78	312.11	30.33
Stenocercus_latebrosus	12.39	14.75	8.21	8.79	20.41	2.54	17.88	13.39	11.14	13.42	11.14	686.07	138.4	8.13	72.4	328.23	32.07	325.53	32.07
Stenocercus_marmoratus	14.8	15.53	6.5	26.05	25.22	1.39	23.83	17.26	11.2	17.49	11.02	575.35	122.44	2.89	92.85	339.26	15.88	271.33	17.15
Stenocercus_ochoai	12.47	16.17	7.72	9.63	22.51	1.66	20.86	12.71	11.19	13.56	11.06	933.64	164.64	10.55	72.09	471.45	43.64	282	49.45
Stenocercus_orientalis	16.54	11.36	8.26	4.37	23.3	9.64	13.66	16.58	15.86	17.04	15.84	953.6	122.4	42.4	30	313.8	143.2	267.2	144
Stenocercus_ornatissimus	8	13.63	7.63	13.16	15.73	-2	17.73	9.6	6.17	9.6	6.17	487.67	117	2	107	301.33	9.33	301.33	9.33
Stenocercus_percultus	19.41	12.43	8.38	8.26	26.69	11.94	14.75	20.32	18.34	20.44	18.33	541.58	162.5	6.92	104.33	331.25	28.58	312.67	29.42
Stenocercus_puyango	20.84	11.7	8.29	7.95	27.94	13.84	14.1	21.68	19.88	21.79	19.8	654.37	174.98	5.94	111.96	402.69	24.24	311.86	58.33
Stenocercus_scapularis	19.56	13.48	7.84	8.09	27.59	10.46	17.13	19.79	18.44	20.38	18.4	2063.36	302.46	65.5	50.59	855.33	223.7	578.9	227.73
Stenocercus_torquatus	16.12	14.69	8.01	7.41	24.41	6.17	18.24	16.28	15.05	16.96	15.05	952.67	134	22.13	52.73	387.67	76.07	316.73	83.2
Stenorrhina_freminvillei	24.52	11.25	6.98	13.33	32.53	16.51	16.02	25.15	23.93	25.99	22.64	1588.45	289.11	22.87	74.14	749.5	80.99	384.96	173.96
Stoliczkia_borneensis	25.49	8.4	8.7	3.84	30.52	20.89	9.63	25.18	25.54	25.93	24.94	2944.89	371.13	157.3	26.27	987.8	535.81	670.7	839.35
Storeria_dekayi	20.97	13.11	5.73	33.75	31.99	8.82	23.17	23.68	17.52	24.71	16.22	1001.67	189.6	21.92	68.98	463.81	79.34	333.42	98.88
Storeria_occipitomaculata	9.53	12.02	3.14	93.35	28.48	-10.16	38.64	15.97	2.06	21.03	-3.07	1040.51	118.81	56.35	24.97	330.56	189.98	302.26	220.61
Strophurus_ciliaris	23.93	14.52	5	50.88	37.51	8.46	29.06	28.97	18.81	29.77	16.87	405.87	93.73	4.61	73.74	242.56	19.72	168.77	23.98
Strophurus_jeanae	26.31	15.06	5.2	47.82	38.91	10.21	28.7	30.81	21.87	31.35	19.45	374.49	99.38	2.16	103.2	245.55	11.53	186.21	16.38
Strophurus_taenicauda	21.06	13.35	5.14	44.93	32.96	7.02	25.94	26	16.02	26.25	14.8	765.25	139.78	19.59	59.41	376.75	73.37	342.83	82.1
Taeniophallus_affinis	20.59	10.55	6.2	21.04	28.62	11.63	16.99	22.18	18.38	23.02	17.7	1359.23	213.22	45.21	52.16	579.07	155.53	472.3	194.02
Takydromus_kuehnei	19.42	7.97	3.36	56.48	30.6	6.81	23.8	24.48	12.79	25.98	11.62	1567.56	285.07	29.01	68.46	769.01	104.32	701.5	126.25
Takydromus_sexlineatus	24.52	9.36	6.4	19.1	31.98	15.86	16.12	25.65	22.35	26.58	21.75	2166.29	356.03	58.2	62.94	959.88	202.35	628.73	330.71
Takydromus_toyamai	23.5	4.9	3	38.86	31.45	15.35	16.1	27	18.55	28.15	18.4	2135.5	240.5	137	21	641.5	416	617.5	427.5
Tantalophis_discolor	15.84	16.23	7.04	14.85	27.07	4.2	22.87	16.6	14.06	17.63	13.73	743.4	157.7	6.2	88.4	397.2	23.7	266.4	32.1
Tarentola_americana	24.67	9.25	6.09	20.09	31.9	16.86	15.05	26.57	22.04	26.99	21.87	1311.19	208.62	35.83	56.69	531.54	125.82	477.63	130.97
Tarentola_angustimentalis	18.99	7.1	4.86	25.21	26.9	12.41	14.49	16.95	21.76	22.35	15.96	126.62	30.75	0	91.38	74.38	0	4.12	69.12
Tarentola_boehmei	18.39	14.52	4.48	58.57	35.31	2.87	32.44	13.28	25.24	26.07	10.84	183	32.96	0.74	72.79	86.56	5.31	9.47	73.28
Tarentola_boettgeri	18.07	7.36	4.81	26.38	26.7	11.49	15.21	15.89	20.97	21.67	14.94	249.29	52	0.57	85.14	140.57	3.14	9.29	118.29
Tarentola_caboverdiana	19.2	4.5	5.05	16.53	23.65	14.8	8.85	21.35	18.55	21.35	17.15	287	103.5	0	122.5	207.5	0.5	207.5	22
Tarentola_chazaliae	20.31	9.2	5.49	24.65	28.47	11.8	16.67	19.54	21.35	23.42	17.01	60.89	15.34	0.06	87.06	34.45	0.98	7.29	29.66
Tarentola_darwini	22.15	6.95	6.2	14.8	27.45	16.3	11.15	24.05	21.2	24.05	20.25	388	155.5	0	149.5	333.5	0	333.5	4
Tarentola_delalandii	15.27	7.1	4.2	32.42	24.96	8.17	16.79	12.5	19.21	19.86	11.63	452.29	90.14	1	83.43	249.86	7.14	14.43	211.57
Tarentola_deserti	19.23	13.62	3.72	77.7	39.06	2.91	36.14	15.95	28.61	29.53	9.55	127.03	17.29	2.19	44.55	45.15	13.47	14.11	34.68
Tarentola_gigas	23.53	4.57	5.23	15.74	27.87	19.23	8.63	25.6	22.2	25.6	21.57	156.67	78.33	0	160	130.33	0	130.33	3.67
Tarentola_gomerensis	17	6.9	4.3	29.49	26	10.2	15.8	14.5	20.4	21.2	13.6	390	80	1	85	218	6	12	190
Tarentola_mauritanica	15.69	11.05	3.9	58.41	31.06	3.14	27.92	11.59	22.55	23.33	8.45	463.51	67.11	9.42	53.61	181.35	43.27	49.27	160.47
Tarentola_mindiae	21.35	14.82	4.86	57.11	36.03	5.89	30.15	14.52	27.06	28	13.57	27.35	7.21	0	85.09	17.23	0.01	0.01	17.13
Tarentola_neglecta	21.91	14.9	3.81	82.14	42.14	3.57	38.57	14.68	31.94	32.51	11.37	55.14	8.9	0.37	56.22	22	3.47	3.73	17.9
Tarentola_rudis	23.6	7.2	6.6	13.41	28.7	17.9	10.8	25.3	22.8	25.3	21.9	286	121	0	155	248	0	248	4
Teira_dugesii	15.5	5.93	4.43	26.54	22.9	9.6	13.3	13.67	18.37	19.2	12.53	674	107.67	5	67	312.33	28	41	266.33
Teius_teyou	21.67	13.43	5.38	40.05	33.89	8.84	25.04	26.03	16.65	26.48	16.3	795.16	121.62	15.83	60.3	334.36	61.87	318.95	72.62
Telescopus_fallax	15.68	12.3	3.56	77.6	34.01	0.11	33.9	8.61	23.9	25.45	5.65	490.56	82.58	10.06	66.67	219.59	36.86	45.91	196.7
Tenuidactylus_caspius	12.59	12.79	3.08	100.34	34.2	-7.01	41.21	9.04	23.78	25.35	-0.5	206.54	39.18	2.27	64.8	100.54	9.7	11.72	72.23
Teratoscincus_przewalskii	9	14.57	2.95	122.58	32	-16.69	48.68	23.16	-4.62	23.59	-7.89	65.55	14.36	1.1	81.45	35.61	4.39	35.17	4.7
Tetradactylus_africanus	19.78	10.88	5.68	26.69	28.37	9.39	18.98	21.83	16.75	23.02	16.14	785.64	108.24	28.46	39.89	293.85	96.83	284.66	100.26
Thamnodynastes_pallidus	25.69	10.89	7.66	6.85	32.77	18.36	14.41	25.71	25.21	26.38	24.7	2160.04	316.33	58.04	52.86	878.69	206.37	442.1	465.32
Thamnodynastes_strigatus	20.47	12.13	5.72	31.25	30.91	9.62	21.29	22.76	17.45	24.2	16.33	1313.62	185.86	49.43	43.93	502.63	172.11	442.71	188.58
Thamnophis_atratus	11.37	14.33	5.05	49.95	28.02	-0.41	28.43	5.85	17.82	18	5.49	988.56	180.64	5.01	78.76	504.34	31.43	39.27	481.61
Thamnophis_brachystoma	7.7	11.93	3.18	88.78	26.6	-10.29	36.89	17.39	-3.62	18.71	-4.22	1082.59	116.27	63.09	17.05	325.2	210.01	322.61	214.09
Thamnophis_butleri	8.9	11.1	2.87	95.22	28.24	-9.7	37.93	19.06	-3.37	20.71	-3.87	881.05	96.96	45.02	22.1	275.7	157.63	266.2	159.83
Thamnophis_chrysocephalus	18.63	14.21	6.9	15.38	28.62	8.22	20.4	19.39	17.18	20.46	16.47	1300.3	267.89	16.28	90.06	718.03	56.9	358.39	77.04
Thamnophis_couchii	9.18	14.91	4.43	64.4	28.33	-4.9	33.23	2.45	17.39	17.75	1.62	750.14	131.09	7.55	66.98	358.35	34.62	39.34	354.1
Thamnophis_cyrtopsis	19.36	15.59	6.01	35.51	32.09	5.79	26.3	22.72	17.75	23.55	14.57	742.66	174.54	6.64	94.3	451.58	28.21	301.37	57.49
Thamnophis_elegans	6.39	14.79	3.86	79.93	27.2	-10.88	38.09	7.53	6.97	16.77	-3.7	503.87	75.65	17.46	41.57	204.71	63.34	109.39	151.35
Thamnophis_eques	16.76	16.83	5.9	39.82	30.89	2.08	28.81	20.6	15.6	21.53	11.42	628.82	148.77	5.98	95.29	387.53	25.98	265.87	54.75
Thamnophis_exsul	23	13.89	4.88	49.94	36.24	7.93	28.31	27.09	16.74	28.76	16.13	740.96	147.67	16.71	68.96	316.92	58.83	260.12	60.21
Thamnophis_fulvus	18.3	11.74	7.19	10.79	26.36	10.11	16.25	18.87	17.12	19.47	16.73	1604.14	310.21	15	81.93	765.83	55.13	480.83	72.19
Thamnophis_gigas	16.53	15.59	4.6	63.77	35.67	2.2	33.46	9.1	24.54	24.54	8.39	290.02	58.2	0.51	82.75	152.65	4.08	4.16	151.1
Thamnophis_godmani	17.94	14.69	7.1	13.51	28.03	7.49	20.53	18.49	16.7	19.59	16.05	1236.5	259.27	11.45	91.79	697.8	42.31	346.91	64.96
Thamnophis_hammondii	16.49	14.85	5.45	44.87	31.22	4.06	27.16	14.03	19.89	22.7	11.29	344.3	67.8	0.82	83.53	186.02	7.52	40.51	167.43
Thamnophis_marcianus	19.63	15.63	5.15	53.44	34.33	3.83	30.5	24.7	16.15	25.97	12.41	487.94	103.04	9.22	80.64	251.9	37.4	191.2	63.18
Thamnophis_melanogaster	17.51	16.61	6.31	29.04	30.22	4.01	26.21	19.96	16.2	20.79	13.44	647.12	154.12	5.45	97.13	406.51	23.29	254.74	43.05
Thamnophis_mendax	18.68	14.52	5.98	32.05	29.95	5.85	24.1	21.52	14.33	22.05	14.12	677.33	128.33	12	74.33	326.83	49.67	292.5	49.67
Thamnophis_ordinoides	8.21	10.06	4.12	49.66	22.43	-1.7	24.12	2.74	14.66	14.79	2.31	1733.62	276.38	33.07	59.32	791.85	135.43	147.7	731.49
Thamnophis_proximus	23.26	11.7	5.69	33.15	33.47	12.11	21.36	25.86	20.27	26.99	18.63	1164.59	209.89	24.45	65.14	523.69	89.81	330.95	154.2
Thamnophis_radix	6.48	13.52	2.98	108.57	28.83	-16.04	44.87	18.3	-6.71	19.96	-8.05	522.32	84.12	14.4	56.21	226.72	51.23	215.2	51.8
Thamnophis_rufipunctatus	14.78	17.68	5.34	54.68	31.22	-1.79	33.01	20.7	14.03	21.52	7.65	525.68	125	7.38	88.49	318.62	31.17	272.75	71.38
Thamnophis_sauritus	12.97	12.05	3.55	79.64	29.91	-4.28	34.19	17.21	7.68	22.86	2.34	1163.27	130.89	65.53	20.18	363.16	221.16	333.72	267.04
Thamnophis_scaliger	15.48	16.67	6.67	22.27	27.16	2.36	24.8	17.24	13.43	17.92	12.33	718.82	151.09	7.55	90.91	418.73	28.09	251.73	33.64
Thamnophis_sirtalis	6.61	12.35	3.11	97.18	26.71	-13.65	40.37	13.68	-0.4	18.6	-6.41	814.35	106.34	36.36	37.41	293.47	125.21	241.98	174.11
Thamnophis_sumichrasti	17.79	12.27	6.1	23.86	27.47	7.53	19.95	19.46	15.33	20.34	14.41	1687.68	335.34	39.89	73.08	835.76	130.13	494.03	145.76
Thamnophis_valida	24.78	14.45	6.24	32.85	35.41	12.01	23.4	28.37	23.88	28.62	20.42	804.23	216.19	2.19	111.99	564.78	12.43	430.05	53.05
Thamnosophis_epistibes	21.2	10.1	6.27	23.68	28.78	12.81	15.97	23.79	19.03	23.82	17.91	1981.19	345.35	51.89	66.16	960.09	197.07	941.16	258.62
Thamnosophis_infrasignatus	20.42	10.88	6.42	23.85	28.38	11.55	16.82	22.97	17.89	23	17.07	1695.51	322.07	37.85	76.6	887.16	141.53	867.3	173.56
Thamnosophis_lateralis	22	12.17	6.53	22.6	30.56	12.08	18.47	24.24	19.22	24.33	18.73	1460.9	314.31	22.39	91.08	832	84.17	744.4	105.38
Thamnosophis_martae	25	8.6	7	12.36	30.7	18.5	12.2	26.1	23.7	26.1	23.1	1258	331	12	107	827	50	817	57
Thamnosophis_stumpffi	25.57	10.03	6.87	13.28	31.85	17.35	14.5	26.6	23.63	26.72	23.6	1978.83	469.5	20.33	97	1216.67	72.83	849.83	73.67
Thelotornis_capensis	21.86	13.5	6.08	24.08	31.88	9.61	22.27	23.56	18.61	24.26	18.31	940.39	197.94	2.81	95.6	541.61	12.77	299.49	18.48
Thermophis_baileyi	0.26	14.69	4.29	67.49	15.08	-18.76	33.84	8.46	-7.77	8.63	-8.53	291.67	87.42	0.17	127.44	216.72	1.68	216.05	1.74
Thermophis_zhaoermii	2	14.27	4.5	60.69	15.27	-16.1	31.37	9.22	-5.32	9.22	-6.23	698.25	164.1	2	102.45	445.25	9.6	445.25	10
Timon_lepidus	13.41	10.32	3.79	57.29	28.79	1.88	26.91	10.46	19.59	21.04	6.42	650.56	85.59	17.99	38.99	233.44	78.39	85.08	204.38
Timon_pater	15.72	10.92	3.65	64.06	32.43	2.98	29.44	10.1	24.08	24.27	7.92	488.32	72.18	5.82	47.84	198.68	34.76	41.83	187.31
Timon_princeps	15.4	14.18	3.58	88.02	36.65	-2.36	39.01	5.59	26.42	26.59	4.1	497.33	94.74	0.5	87.36	257.66	2.9	3.39	240.91
Timon_tangitanus	14.81	13.29	4.14	60.46	32.4	0.82	31.59	9.62	22.64	22.98	7.47	473.32	70.94	4	56.46	193.46	22.65	26.89	182.3
Toxicocalamus_preussi	25.5	8.8	8.63	4.75	30.85	20.65	10.21	25.43	25.4	25.95	24.8	3786.88	421.19	231.44	18.7	1161.03	757.06	957.64	903.18
Tracheloptychus_madagascariensis	24.22	12.89	6.32	26.72	33.03	12.83	20.2	27.16	20.77	27.17	20.46	560.91	142.15	5.37	98.42	365.78	20.65	353.96	27.38
Tracheloptychus_petersi	24.28	12.94	6.35	26.03	33.01	12.84	20.17	27.21	20.7	27.21	20.65	510.14	140.67	1.95	112.81	360.24	9.67	350.76	9.76
Trachylepis_aurata	12.56	11.71	3.6	72.93	30.19	-1.91	32.1	5.21	21.61	21.82	3.17	572.44	96.58	8.4	59.06	256.13	33.88	44.29	251.87
Trachylepis_aureopunctata	23.04	13.79	6.42	25.99	32.54	11.26	21.28	25.66	19.52	25.71	19.24	850.77	215.14	6.44	102.71	552.34	23.03	494.63	25.89
Trachylepis_boettgeri	18.18	11.76	6.36	25.09	26.74	8.38	18.36	20.73	14.7	20.74	14.52	1276.36	282.96	16.69	93.05	751.76	54.92	737.79	56.44
Trachylepis_dumasi	25.33	12.81	6.38	22.84	33.72	13.81	19.91	27.52	22.05	27.62	21.97	861.25	254.98	2.5	115.57	607.86	10.73	499.02	11.75
Trachylepis_elegans	23.83	13.09	6.61	21.32	32.62	12.92	19.7	25.76	20.85	25.93	20.66	1171.33	304.65	5.67	106.35	766.17	21.57	560.06	23.85
Trachylepis_gravenhorstii	22.85	12.36	6.52	22.14	31.4	12.61	18.79	24.98	20.04	25.11	19.62	1372.59	315.91	16.8	96.93	817.23	63.56	671.69	79.86
Trachylepis_madagascariensis	17.33	11.49	6.41	25	25.63	7.85	17.78	19.93	14.25	19.94	13.76	1549.78	309.77	27.2	83.08	847.65	91.24	837.18	103.73
Trachylepis_margaritifera	23.82	11.65	7.08	13.42	31.73	15.45	16.28	24.64	21.88	25.27	21.84	811.24	189.5	3.1	101.13	454.08	13.08	292.23	13.59
Trachylepis_socotrana	25.48	7.77	5.53	19.27	33.06	19.08	13.98	23.44	27.83	27.83	23.16	95.1	21	2.1	61.4	43.3	9.8	9.8	26.1
Trachylepis_vato	23.32	14.27	6.49	27.16	33.11	11.33	21.79	26.14	19.87	26.16	19.39	728.14	175.41	6.55	95.38	460.23	24.31	428.74	30.6
Trachylepis_vittata	16.55	12.45	3.79	72.23	34.11	1.35	32.76	9.75	25.5	25.63	7.18	351.88	63.41	2.47	69.39	169.8	11.63	16.56	162.86
Trachylepis_wrightii	26.3	4.15	6.65	6.18	29.9	23.7	6.2	26.25	25.75	27.1	25.55	2169.5	367.5	66.5	48.5	927.5	225.5	520	280.5
Trapelus_ruderatus	22.79	14.33	3.99	78.69	40.71	5.23	35.48	15.44	32.06	32.16	12.19	125.53	28.18	0.01	89.44	67.26	0.34	0.46	53.59
Trapelus_savignii	19.88	11.22	4.37	51.24	32.65	7.29	25.36	13.52	25.72	25.98	13.02	76.13	15.89	0	84.99	43.46	0	0	42.89
Tretanorhinus_nigroluteus	25.21	9.05	6.74	13.07	32.02	18.59	13.43	25.74	25.16	26.6	23.32	2363.2	367.83	55.45	53.95	974.02	199.39	531.14	414.72
Tribolonotus_blanchardi	25.06	6.79	8.41	4.17	29.32	21.27	8.04	24.91	25.28	25.47	24.42	3506.44	375.3	241.22	13.07	1017.37	767.59	858.74	954.56
Tribolonotus_brongersmai	26.4	8.18	8.98	1.92	31.15	22.05	9.1	26.15	26.58	26.58	26.1	3671.75	332.5	278.25	5.5	964	860.5	866.25	963
Tribolonotus_ponceleti	25.44	6.8	8.47	4.09	29.63	21.63	8	25.47	25.44	25.83	24.81	3419.62	390.11	221.28	18.3	1069.55	719.81	891.74	857.23
Tribolonotus_pseudoponceleti	25.31	6.72	8.46	4.1	29.5	21.59	7.91	25.28	25.45	25.71	24.68	3471.69	377.5	234.25	14.44	1029.81	752.5	865.75	911.36
Tribolonotus_schmidti	24.15	7.65	8.34	4.78	28.66	19.56	9.11	24.61	23.49	24.64	23.43	2722	379.5	135	35.57	1051.79	458	929.86	473.71
Tricheilostoma_bicolor	27.85	14.49	5.65	32.11	39.87	14.22	25.65	28.48	24.77	31.73	23.44	456.86	142.14	0.2	140.73	328.92	1.58	69.03	70.45
Trimeresurus_flavomaculatus	25.2	8.73	7.45	8.2	31.23	19.49	11.75	25.02	24.75	26.15	24.03	2586.44	409.39	80.02	50.58	1082.77	273.46	586.42	497.03
Trimeresurus_gramineus	26.22	11.28	4.79	32.96	38.43	14.51	23.92	26.38	23.6	30.68	21.94	1177.91	335.63	3.24	110.45	810.6	18.4	191.23	105.08
Trimeresurus_malabaricus	25.45	8.43	5.96	13.72	32.67	18.51	14.16	24.84	25.06	27.48	23.99	2881.06	952.17	6.52	114.96	2069.05	34.11	361.24	780.56
Trimeresurus_schultzei	26.32	7.69	7.66	5.86	31.51	21.53	9.98	25.91	26.22	27.09	25.78	1998.11	322.16	20.23	62.82	904.55	86.93	290.68	792.93
Trimetopon_gracile	19.05	9.35	8.2	5.7	24.9	13.55	11.35	19.1	19.25	19.7	18.25	2784	328	84	37.5	933	305.5	567.5	680.5
Trioceros_affinis	18.86	14.19	7.45	11.4	28.43	9.42	19	18.37	18.18	20.37	17.51	1178.04	246.42	11.36	80.72	628.43	51.84	224.63	409.6
Trioceros_balebicornutus	13.77	13.27	7.73	6.51	22.3	5.23	17.07	13.3	13.4	14.67	13.07	1141.67	160.67	30.67	46.67	452	111.67	310.33	194.33
Trioceros_bitaeniatus	22.42	13.38	7.95	8.99	31.36	14.63	16.73	22.48	22.11	23.57	21.23	848.64	154.72	16.36	68.17	356.3	70.33	184.43	193.78
Trioceros_cristatus	24.62	9.63	7.5	8.85	31.27	18.44	12.83	24.28	24.12	25.65	23.39	1779.28	290.38	20.6	59.47	737.84	95.81	449.67	406.73
Trioceros_deremensis	22.33	9.9	6.33	16.93	30.03	14.7	15.33	23.37	21.53	24.27	19.97	1312.67	255.67	26	69	649	102.67	349.67	108.67
Trioceros_ellioti	19.63	11.99	8.49	4.5	26.86	12.8	14.07	19.56	19.5	20.16	19.04	1320.69	186.32	35.24	43.45	478.8	148.18	303.44	267.37
Trioceros_feae	18.65	7.95	7.9	7.02	24.1	14.1	10	17.85	19.25	19.45	17.65	2566.5	419	45	54.5	1079.5	179.5	431.5	998
Trioceros_fuelleborni	17.25	10.9	6.3	14.97	25.54	8.4	17.14	17.81	15.99	18.96	15	1732.2	355.9	7.1	89.4	905.8	33.5	443.2	50.2
Trioceros_goetzei	18.34	10.89	6.35	16.48	26.63	9.58	17.05	19.24	16.38	20.1	15.89	1273.38	267.66	3.58	96.36	712.41	16.25	372.32	20.49
Trioceros_harennae	14.6	13.74	7.76	6.69	23.2	5.63	17.58	14.21	14.16	15.49	13.8	1114.25	157.88	26.38	48.38	434.94	102	321.56	220.44
Trioceros_hoehnelii	16.94	14.93	8.29	7.71	26.39	8.51	17.89	17.22	16.8	17.87	15.88	1106.67	184.23	33.19	51.28	429.53	129.66	307.9	275.82
Trioceros_jacksonii	17.51	13.77	7.76	10.35	26.77	9.19	17.57	18.29	16.33	18.62	15.97	1017.38	215.37	22.06	75.08	461.52	83.41	356.7	97.91
Trioceros_johnstoni	19.49	10.93	8.51	3.18	25.89	13.1	12.79	19.42	19.2	19.82	19.08	1449.5	185.49	35.45	40.36	503.47	154.75	325.53	240.43
Trioceros_melleri	24.16	10.46	6.3	18.13	32.06	15.53	16.53	25.32	21.97	26.07	21.5	1153.12	252.47	7.05	96.2	683.82	27.98	352.22	33.48
Trioceros_montium	23.69	8.63	7.66	8.07	29.96	18.76	11.2	22.53	24.02	24.66	22.53	2849	441.33	31.81	60.44	1260.22	148.85	474.78	1260.22
Trioceros_narraioca	22.85	14.4	8.35	8.6	31.95	14.85	17.1	23.55	21.65	23.85	21.55	410.5	105.5	5.5	79	196	31	129	32.5
Trioceros_oweni	24.47	10.04	8.12	6.18	30.84	18.52	12.33	24.25	24.07	25.18	23.61	1815.51	254.86	46.64	43.34	670.65	185.35	479.08	359.63
Trioceros_pfefferi	19.87	10.24	7.53	9.6	27.63	14.08	13.55	18.55	20.54	21.05	18.55	2127.81	379.31	11.69	70.25	1033.56	62.44	343.44	1033.56
Trioceros_quadricornis	19.24	9.74	7.58	9.46	26.48	13.7	12.78	17.88	19.94	20.34	17.88	2305	404	16	68.2	1106.6	81.6	379.2	1106.6
Trioceros_rudis	20.14	11.09	8.31	4	26.82	13.51	13.31	20.03	19.91	20.57	19.62	1328.48	178.98	30.25	43.93	476.44	130.47	287.17	241.13
Trioceros_schubotzi	10.18	12.28	7.83	7.9	18.58	2.98	15.6	10.95	9.45	11.08	9	1662.75	292.25	53	60	678.25	218.5	513.75	227
Trioceros_sternfeldi	15.38	10.31	6.75	14.23	23.33	8.18	15.15	16.07	13.53	16.85	13.27	1159.13	257.6	14.73	79.33	547.13	49.8	365.47	59
Trioceros_tempeli	17.06	10.73	6.39	15.72	25.24	8.58	16.67	17.98	15.26	18.68	14.69	1326.78	279.39	4.39	92.67	722.39	21.44	331.56	26.39
Trioceros_werneri	19.18	10.36	6.44	15.31	27	11.05	15.94	20.08	17.37	20.77	16.89	1184.54	252.21	4.92	91.54	649.67	22.71	330.21	26.5
Trioceros_wiedersheimi	22.04	11.73	6.94	8.84	30.89	14.08	16.81	21.01	22.2	23.24	21.01	1711.38	290.88	3.38	75.62	841	21.75	232.38	841
Trogonophis_wiegmanni	15.78	11.82	3.92	61.36	32.45	2.64	29.81	11.21	23.8	24.01	8.3	417.38	62.23	4.19	51.46	168.66	25.88	29.94	157.82
Tropidoclonion_lineatum	14.01	13.84	3.53	88.04	33.21	-5.76	38.97	21.54	3.43	25.05	2.28	762.39	109.09	26.46	44.34	283.19	95.72	242.17	97.59
Tropidodipsas_sartorii	25.01	10.62	6.47	17.84	33.11	16.78	16.33	26.05	24.38	26.9	22.45	1762.75	307.83	37.11	65.17	799.43	129.99	430.31	233.06
Tropidodryas_serra	21.16	10.3	6.13	20.58	29.09	12.37	16.72	23.22	18.57	23.62	18.36	1325.03	206.82	42.22	51.2	569.27	147.92	483.79	156.12
Tropidophis_pardalis	24.66	9.85	6.23	20.29	32.09	16.43	15.66	26.67	21.92	26.94	21.8	1423.96	223.53	35.18	58.01	581.61	131.23	551.08	132.64
Tropidophorus_grayi	26.26	7.74	7.56	7.67	31.62	21.44	10.18	25.92	26.15	27.12	25.18	2643.04	384.02	86.75	45.19	1057.57	302.31	547.73	620.43
Tropidophorus_latiscutatus	25.5	10.1	5.1	25.6	33.5	14	19.5	27.6	21.9	28	21.7	2730	585	4	97	1625	28	1089	39
Tropidophorus_misaminius	25.29	9.13	8.42	4.64	30.93	20.16	10.77	24.92	25.4	25.8	24.66	2915.25	397.94	126.12	37.26	1080.19	409.76	609.31	819.31
Tropidophorus_partelloi	24.85	9.37	8.39	4.38	30.63	19.55	11.09	24.62	24.85	25.35	24.26	2605.01	338.11	121.07	32.71	922.71	394.68	591.39	684.8
Tropidoscincus_aubrianus	22.03	7.07	5.35	21.6	28.27	15.2	13.07	24.72	20.08	24.72	19.15	1973	298	78.17	46.83	855.67	251.5	855.67	284
Tropidoscincus_boreus	21.88	7.25	5.41	21.93	28.25	14.98	13.27	24.62	19.7	24.62	18.97	1580.24	245.76	62.89	48.35	701.54	201.89	701.54	226.86
Tropidoscincus_variabilis	21.28	7.21	5.2	24.02	28.01	14.29	13.72	24.29	20.36	24.29	18.09	1742.8	229.5	79.4	34.7	643.6	253.5	643.6	302
Tropidurus_bogerti	21.86	10.02	8.56	4.05	27.82	16.16	11.66	21.58	21.6	22.28	21.3	2500	417.8	37.2	66.4	1213	133.6	399.6	196.6
Tropidurus_erythrocephalus	22.33	11.55	7.27	12.79	29.97	14.19	15.79	23.28	21.01	23.57	20.4	686.24	115.53	8.76	70.97	318.46	35.68	219	54.28
Tropidurus_psammonastes	25.67	13.99	7.78	8.38	34.22	16.35	17.87	26.15	24.32	26.4	24.32	693.6	124.93	0.8	88.27	352	3.8	223.73	3.8
Tropidurus_spinulosus	22.9	13.34	5.65	35.48	34.14	10.38	23.77	26.6	18.55	26.97	18.02	767.72	126.86	11.26	65.6	347.87	47.98	320.3	63.69
Tropidurus_torquatus	24.91	11.25	7.33	10.03	32.46	16.94	15.53	25.24	24.12	25.97	23.48	1771.99	286.18	35.08	64.34	785.15	129.46	363.52	371.72
Tropiocolotes_tripolitanus	23.9	15.85	4.41	70.28	41.83	6.07	35.76	21.92	26.8	32.53	14.5	24.39	5.73	0.02	70.75	13.05	0.6	4.09	8.11
Tympanocryptis_uniformis	26.8	14.33	5.52	36.26	38	12.2	25.8	29.4	21.47	30.63	21.46	788.96	194.26	1.38	106.56	514.37	9.11	288.75	9.12
Typhlops_biminiensis	25.07	7.09	4.97	24.94	32.08	17.89	14.19	27.4	21.89	28.06	21.73	1028.6	164.85	28.15	58.1	439.55	97.3	379.1	103.65
Typhlops_capitulatus	24.44	11.03	7.33	11.73	31.38	16.45	14.94	25.53	22.77	25.76	22.77	1484.91	227	34.55	52.09	563.91	119.36	480.91	119.36
Typhlops_hectus	24.06	9.6	6.96	11.85	30.38	16.71	13.67	24.84	22.46	25.42	22.38	1868.14	287.64	65.5	45.5	688.64	228.79	508	240.29
Typhlops_hypomethes	25.4	8.83	7.17	12.55	31.23	18.97	12.27	26.77	23.8	26.77	23.63	1837.67	199	78.33	26.33	567	282	567	286.33
Typhlops_jamaicensis	24.61	7.16	6.91	9.79	29.74	19.42	10.32	25.29	23.39	25.7	23.24	1782.08	281.77	57.58	48.08	699.38	206.42	520.19	213.88
Typhlops_sulcatus	23.62	11.26	7.46	11.42	30.64	15.64	15	24.68	22.02	24.93	21.99	1313.79	204.98	30.67	55.51	527.33	106.05	436.7	106.51
Typhlops_syntherus	25.14	10.62	7.5	11.19	31.88	17.8	14.08	26.26	23.68	26.5	23.56	1044.8	164.8	29.4	55.6	439.6	98.2	360.8	99.6
Typhlosaurus_caecus	17.14	12.52	6.04	28.78	27.68	7.05	20.62	13.81	20.4	20.63	13.35	162.5	29.31	2.71	62.25	78.29	11.7	13.56	76.86
Uma_exsul	19.86	15.11	5.32	48.01	33.1	4.87	28.22	24.37	15.94	25.3	13.27	311.62	59.88	5.02	70.5	162.26	24.02	146.69	34.26
Uma_inornata	18.54	16.32	4.49	70.68	38.1	2.18	35.92	10.91	21.54	27.87	10.02	194.33	28.22	1	51.67	77.33	16	35.44	76.33
Uma_notata	22.18	16.65	4.56	72.16	41.01	4.89	36.13	24.41	25.47	31.52	13.23	93.48	16.27	0.17	57.72	39.62	3.8	23.05	34.75
Uma_paraphygas	19.04	15.56	5.24	50.27	33.28	3.9	29.38	23.96	16.84	24.82	12.04	305.8	68.6	5.6	86.8	182.8	19.6	151.2	31.4
Uma_scoparia	19.7	15.24	4.06	78.37	39.6	2.52	37.07	20.02	23.62	29.97	10.05	124.66	19.68	1.21	48.83	48.4	9.88	27.43	45.48
Urocotyledon_inexpectata	25.94	4.18	6.64	6.07	29.54	23.31	6.23	25.92	25.39	26.74	25.19	2198.78	371.56	67.11	48.33	938.56	228.56	528.78	284.44
Uromastyx_benti	22.71	10.6	5.3	30.42	32.29	12.48	19.82	21.27	23.43	26.31	18.66	79	17.13	0.48	73.14	36.65	6.07	12.26	23.58
Uromastyx_ocellata	24.97	12.52	5.62	35.12	35.93	13.59	22.35	26.22	22.24	29.04	20.29	124.2	30.89	1.19	89.4	64.77	7.58	34.81	16.96
Uromastyx_thomasi	26.1	10.57	5	33.2	36.33	15.36	20.97	24.97	25.4	29.93	21.34	45.37	11.16	0.69	81	25.16	3.05	8.69	9.15
Uropeltis_ceylanicus	24.45	9.84	5.75	16.64	33.29	16.23	17.06	23.82	24.01	26.94	22.71	2078.11	710.9	3.76	111.84	1482.58	19.17	184.19	330.89
Uropeltis_liura	24.6	7.95	6.45	12.17	30.8	18.5	12.3	24.1	24	26.1	22.9	1299.5	219	26	52.5	505.5	105.5	295	294.5
Uroplatus_alluaudi	23.03	10	7.07	16.39	29.57	15.5	14.07	24.7	21.13	24.7	20.67	1524	281.67	35.67	71.67	784.33	139.67	784.33	148
Uroplatus_ebenaui	25.45	9.71	7	12.53	31.69	17.91	13.78	26.43	23.85	26.56	23.58	1588	386.83	16.13	101.65	1003.74	59.61	731.43	64.35
Uroplatus_fimbriatus	21.48	9.69	6.2	23.61	28.87	13.38	15.49	24.09	19.51	24.12	18.25	2140.42	368.69	57.58	63.58	1028.85	219.6	1006.4	292.69
Uroplatus_giganteus	23.45	9.09	6.66	17.83	29.96	16.4	13.56	25.35	22.09	25.41	20.94	1863.98	287.12	56.32	53.77	809.32	213.54	799.05	281.41
Uroplatus_guentheri	25.97	12.98	6.53	18.97	34.43	14.64	19.79	27.46	23.14	27.74	23.08	1188.07	351.36	1.5	119.29	833.29	6.57	495.93	6.57
Uroplatus_henkeli	26.37	11.58	6.93	13.45	33.96	17.33	16.63	27.2	24.38	27.66	24.31	1669.86	451.22	7.19	111.72	1112.83	26.5	568.25	27.17
Uroplatus_lineatus	21.13	10.25	6.54	22.42	28.76	13.22	15.54	23.57	18.98	23.59	18	1868.77	326.06	46.51	67.69	912.96	178.13	910.54	223.44
Uroplatus_malahelo	20.15	11.4	6.48	24.52	28.33	10.78	17.55	22.93	17.3	22.93	16.7	1091.5	192.5	32.5	64.75	537.25	110	537.25	133.5
Uroplatus_malama	20.38	11.66	6.33	25.56	28.78	10.5	18.28	23.13	17.44	23.15	16.7	1211.98	239.24	27.88	78.83	650.51	97.2	646.12	110.1
Uroplatus_phantasticus	19.32	10.79	6.33	25.17	27.37	10.45	16.92	22	16.74	22.03	15.79	1745.14	331.09	38.74	76.46	915.49	142.94	896.42	176.97
Uroplatus_pietschmanni	19.28	11.25	6.43	26.24	27.55	10.2	17.35	22.05	16.93	22.05	15.58	1646.75	315.25	38	76.75	879.5	138.5	879.5	158
Uroplatus_sikorae	20.29	11.19	6.56	23.2	28.3	11.38	16.92	22.71	17.74	22.75	17.02	1647.06	328.58	32.51	81.64	897.12	121.52	870.77	143.48
Urosaurus_auriculatus	23.9	6.05	4.33	26.74	30.25	16.38	13.88	27.6	22.45	27.6	20.65	302.75	77	0	103.25	199.5	1.25	199.5	16.25
Urosaurus_bicarinatus	23.07	14.41	6.59	22.28	33.61	11.65	21.97	24.83	22.34	25.65	20.02	1080.2	262.91	4.21	105.65	694.59	19.96	421.1	59.32
Urosaurus_clarionensis	24.7	3.2	2.4	31.8	30.1	16.8	13.3	28.9	24	28.9	20.6	108	25	0	84	61	2	61	26
Urosaurus_gadovi	27.19	14.49	6.86	14.73	37.58	16.53	21.06	27.77	26.87	29.04	25.1	810.91	197.14	2.2	107.11	520.57	8.86	204.11	29.97
Urosaurus_graciosus	20.18	15.64	4.36	73.52	38.99	3.32	35.66	21.8	23.32	29.78	11.11	165.39	26.98	1.93	52.41	64.82	11.75	47.2	53.27
Urosaurus_lahtelai	17.63	16.93	5.8	44.1	33.47	4.6	28.87	12.53	18.6	23.93	12.53	131.33	23.33	0	66.33	59.33	3.67	27.67	59.33
Urosaurus_nigricaudus	19.69	15.39	5.7	43.16	33.71	6.9	26.81	19.68	20.61	25.7	14.59	190.14	42.27	0.31	82.66	105.69	4.01	71.48	65.87
Urosaurus_ornatus	15.56	16.2	4.48	71.87	33.88	-2.2	36.08	21.78	14.1	24.7	6.32	362.48	66.21	10.2	58.28	164.01	39.69	136.59	65.74
Uta_palmeri	23.3	15.7	5.4	51.64	37.65	8.7	28.95	30.05	24.6	30.05	16.8	104	22	0	78	51	0	51	33
Uta_squamata	23.8	14.35	5.4	47.71	36.5	10.2	26.3	30.1	24.3	30.1	17.9	169.5	42	1	85.5	97.5	6	97.5	41
Uta_stansburiana	14.12	16.12	4.49	70.93	33.2	-2.89	36.09	15.89	15.29	23.31	5.16	301.88	51.33	7.94	53.93	133.06	31.36	93.51	72.11
Varanus_beccarii	26.64	7.07	7.46	7.72	31.41	22.01	9.41	27.05	26.04	27.32	25.45	2191.56	288.39	72.5	39.56	814.67	263.39	686.06	377.22
Varanus_bengalensis	23.73	11.25	5	38.7	35.05	10.95	24.1	25.41	21.24	28.24	18.31	1377.58	305.24	16.04	95.08	782.79	64.77	403.15	136.41
Varanus_boehmei	26.18	6.38	8.5	3.59	30.08	22.6	7.48	25.88	26.48	26.48	25.6	2766.17	340.5	170	25.83	966.83	525.17	525.17	777.5
Varanus_doreanus	26.01	8.3	8.26	5.73	31.21	21.19	10.02	26.22	25.55	26.53	25.14	3021.78	353.11	162.89	27.6	986.56	536.1	814.47	608.11
Varanus_exanthematicus	26.05	12.22	6.78	13.59	35.32	17.11	18.21	25.13	25.73	27.92	24.46	1351.15	266.2	8.39	82.85	691.7	41.87	208.43	430.92
Varanus_finschi	24.66	7.51	8.23	5.44	29.42	20.23	9.19	24.56	24.61	25.16	23.84	3248.13	422.14	172.2	33	1158.45	569.99	836.3	884.6
Varanus_glauerti	27.12	11.77	5.62	28.24	36.26	15.44	20.83	28.94	23.26	30	22.86	989.22	262.87	1.01	114	691.73	11.71	306.87	13.35
Varanus_indicus	25.73	8.98	7.42	11.73	31.91	19.23	12.69	26.4	24.45	26.93	23.97	2426.29	338.07	109.88	54.51	940.43	362.87	705.38	435.75
Varanus_jobiensis	25.3	8.49	8.4	5.36	30.53	20.47	10.06	25.49	24.93	25.79	24.49	3098.67	353.24	173.35	23.71	987.36	566.72	829.96	640.78
Varanus_marmoratus	25.41	8.24	6.82	10.6	31.57	19.45	12.12	25.26	24.63	26.68	23.92	2487.69	451.99	43.81	65.44	1177.09	163.48	555.18	368.85
Varanus_olivaceus	24.88	8.28	6.74	12.22	31.09	18.82	12.26	24.42	24.24	26.23	23.08	2943.16	489.12	91.12	51.16	1281	324.04	601.16	631.62
Varanus_prasinus	25.77	8.33	8.26	5.8	30.99	20.93	10.07	25.99	25.31	26.3	24.89	3000.47	349.09	162.47	27.11	976.25	534.54	811.61	606.03
Varanus_primordius	27.3	12.44	5.87	22.06	36.69	15.65	21.04	28.32	23.94	29.71	23.94	1343.42	311.01	1.7	104.31	855.52	7.22	386.63	7.22
Varanus_rosenbergi	16.25	12.43	5.08	41.9	29.58	5.3	24.28	12.52	19.54	21.59	10.93	498.62	73.8	19.08	40.68	201.3	65.34	78.65	186.58
Varanus_salvadorii	26.06	8.17	8.18	6.13	31.26	21.29	9.97	26.29	25.6	26.62	25.13	3059.01	356.23	169.06	27.03	992.62	556.69	817.01	637.07
Varanus_salvator	25.39	8.95	6.94	14.03	32.21	18.01	14.19	25.84	23.9	26.92	23.36	2326.08	363.79	73.21	57.52	986.5	252.63	583.38	426.3
Varanus_scalaris	26.47	11.21	5.88	24.19	35.06	15.94	19.12	28.12	23.24	29.04	22.85	1206.08	287.27	5.46	107.03	786.72	22.81	433.77	27.5
Varanus_yemenensis	26.46	11.53	5.85	28.37	36.02	16.57	19.45	28.56	25.24	29.86	22.66	182.74	41.88	2.46	70.13	92.41	14.58	66.91	18.64
Varzea_bistriata	26.14	9.9	8.03	4.23	32.56	20.2	12.36	25.8	26.28	26.66	25.61	2368.1	338.78	70.66	49.06	946.94	244.84	384.35	744.17
Vipera_ammodytes	10.66	9.53	3.21	69.72	26.41	-2.85	29.26	10.68	11.74	19.47	1.62	811	102.9	40.61	28.85	280.29	134.29	176.77	218.35
Vipera_aspis	10.88	8.74	3.43	58.65	24.73	-0.42	25.15	10.3	12.43	18.41	3.43	861.47	97.07	48.24	20.86	265.6	165.7	194.47	217.92
Vipera_barani	8.82	10.26	3.39	68.43	24.66	-5.21	29.87	8.96	15.08	17.31	-0.08	697.37	88	31.45	30.55	239.01	108.32	114.53	183.32
Vipera_dinniki	1.62	10.52	3.5	66.76	17.37	-12.27	29.63	7.92	-6.84	9.91	-7.01	957.59	137.79	37.23	41.47	375.44	126.1	341.07	133.22
Vipera_eriwanensis	4.18	11.68	3.22	82.69	22.78	-13.18	35.95	7.69	-3.26	14.27	-6.77	555.92	91.08	23	43.08	230.54	81.54	143.23	82.54
Vipera_kaznakovi	11.57	9.04	3.26	65.88	25.91	-1.38	27.28	9.88	9.36	19.92	3.2	1313.67	144.22	79.63	17.29	403.9	264.27	326.51	356.82
Vipera_latastei	13.99	10.74	3.81	58.83	29.96	2.09	27.87	10.56	20.4	21.86	6.85	587.52	80.99	11.73	44.35	222.28	55.96	62.74	198.24
Vipera_lotievi	4.28	10.01	3.17	74.24	20.66	-10.53	31.2	11.62	-5.27	13.56	-5.38	776.22	120.92	23.99	49.74	329.33	82.57	298.54	83.08
Vipera_seoanei	11.22	8.93	3.92	47.14	23.99	1.51	22.49	7.18	17.34	17.49	5.48	998.61	128.88	37.97	31.54	351.68	143.78	152.54	320.79
Vipera_ursinii	8.44	8.64	3.13	65.12	23.26	-3.9	27.16	6.69	12.26	16.73	0.11	972.59	113.92	54.71	22.12	315.16	185.92	203.71	255.68
Virginia_striatula	17.28	12.96	3.86	73.19	33.43	0.08	33.35	19.64	14.64	26.35	7.46	1184.13	139.17	63.08	23.58	371.57	220.79	310.14	272.66
Voeltzkowia_fierinensis	24.1	12.92	6.32	26.41	33.12	12.87	20.25	27.11	20.66	27.11	20.44	473.66	120.97	3.34	101.59	315.41	15.22	309.84	16.66
Voeltzkowia_lineata	23.93	13.64	6.4	28.41	33.36	12.26	21.1	27.07	20.6	27.08	19.93	539.39	117.59	8.04	87.3	320.39	29.96	317.4	40.56
Voeltzkowia_rubrocaudata	24.12	14.12	6.45	26.17	33.57	11.88	21.69	26.82	20.55	26.86	20.32	666.46	180.1	3.02	108.56	454.97	13.03	425.89	13.97
Xantusia_arizonae	15.83	18.2	4.8	72.02	35.93	-1.6	37.53	25.1	18.43	25.4	7.2	376.33	58.67	6	46	134	30.33	105.67	112.33
Xantusia_bezyi	18.52	15.46	4.36	73.62	36.94	1.83	35.12	20.99	21.7	28.1	9.45	444.37	65.37	7.05	47.53	154.68	31.84	122.68	141.53
Xantusia_bolsonae	20.8	17.55	5.7	45.3	34.85	4.5	30.35	24.85	19.05	25.9	14.55	288	66	3	91.5	177.5	13.5	112	23
Xantusia_gracilis	21.9	17.4	4.7	70.1	41.2	4.5	36.7	14.6	24.4	30.9	13.2	115	19	0	58	52	7	16	49
Xantusia_henshawi	15.83	15.48	5	55.48	32.86	2.12	30.74	9.87	19.88	23.43	9.41	342.59	60.38	1.51	68.82	169.29	17.7	44.03	156.3
Xantusia_riversiana	15.41	6.87	5.33	21.95	21.99	9.2	12.79	13.23	17.49	18.37	13.01	221.43	48.71	0	95.57	125	0.71	4	122.71
Xantusia_sanchezi	18.92	16.76	6.28	25.25	32.04	5.58	26.46	21.06	18.12	21.82	15.36	854	231.8	4.8	112	583.4	18.8	407.2	37.6
Xantusia_vigilis	16.44	15.51	4.46	69.79	35.41	0.44	34.97	11.62	20.49	25.73	7.95	210.09	34.3	2.8	54.04	91.86	15.97	36.85	84.59
Xenochrophis_flavipunctatus	22.48	9.12	4.52	38.57	32.52	11.14	21.38	25.03	18.2	26.97	17.13	1716.25	332.46	21.06	74.46	880.96	83.84	558.41	124.3
Xenochrophis_punctulatus	26.61	8.87	5.22	15.29	34.74	17.81	16.93	26.51	25.3	28.49	24.54	3582.69	851.78	2.08	107.33	2375.01	14.5	586.14	19.84
Xenodermus_javanicus	25.48	8.58	8.72	3.34	30.55	20.72	9.82	25.27	25.43	25.84	25.02	2797.82	338.83	137.77	28.82	931.47	458.83	671.96	752.27
Xenodon_neuwiedii	21.01	11.8	6.37	21.79	29.8	11.26	18.55	22.45	18.89	23.45	17.99	1249.1	197.57	38.97	56.29	531.62	136.45	433.43	154.09
Xenopeltis_unicolor	23.9	9.43	6.42	19.8	31.44	15.18	16.26	25.19	21.65	26.06	21.05	2096.41	341.69	58.97	62.12	923.04	204.7	609.6	333.55
Xenophidion_schaeferi	27	9.1	8.55	3.53	32.5	21.9	10.6	26.7	27.1	27.5	26.55	2322.5	272	119	26	763.5	392.5	659.5	679
Xenopholis_scalaris	25.18	11.09	7.48	8.65	32.49	17.52	14.97	25.37	24.52	26.08	23.94	1884.9	292.2	43.06	60.31	804.8	156.02	388.32	390.53
Xenosaurus_grandis	20.4	12.27	6.78	16.08	29.22	11.27	17.96	21.42	18.94	22.17	18.11	1845.26	348.3	33.04	82.22	959.7	109.26	488.96	133.35
Xenosaurus_platyceps	19.09	14.42	5.94	32.66	30.28	6.2	24.08	21.9	14.81	22.51	14.46	671.73	127.82	11.82	74.73	326.36	48.36	288.91	48.55
Xenotyphlops_grandidieri	26.55	7.6	6.6	12	32.1	20.7	11.4	27.55	25.2	27.7	24.8	1128	304.5	12.5	106.5	742.5	52	731	60
Zamenis_hohenackeri	10.24	11.13	3.28	79.05	28.2	-5.43	33.63	8.82	14.81	20.1	-0.08	570.29	94.87	14.5	52.2	249.82	52.08	80.99	182.73
Zamenis_longissimus	10.11	9.37	3.23	69.04	25.46	-3.31	28.77	12.31	8.51	18.77	1.08	773.06	96.08	41.5	27.05	260.27	138.25	199.17	184.77
Zamenis_persica	11.93	12.67	3.46	81.98	31.09	-4.94	36.02	8.38	21.45	22.24	1.39	399.5	64.12	9.14	58.08	167.43	33.7	37.99	120.71
Zamenis_situla	13.1	9.98	3.45	65.71	28.82	0.36	28.45	7	21.06	21.58	4.87	766.94	120.54	21.98	49.2	321.46	79.86	85.28	296
Zonosaurus_aeneus	19.69	11.21	6.36	24.76	27.82	10.34	17.48	22.29	16.94	22.32	16.16	1552.95	307.59	33.1	79.94	838.79	117.48	809.03	135.99
Zonosaurus_anelanelany	21.6	10.69	6.22	24.47	29.39	12.34	17.05	24.3	19.27	24.35	18.13	1759.55	288.05	56.36	55.59	797.68	215.41	767.55	260.77
Zonosaurus_bemaraha	24.82	12.58	6.53	18.44	33.15	14	19.15	26.2	22.05	26.42	21.9	1311.17	348.33	2	109.17	873.5	12	397.33	12
Zonosaurus_boettgeri	24.32	9.05	6.84	15.11	30.46	17.32	13.14	25.79	22.9	25.86	22.15	1732.27	322.69	37.92	74.04	871.92	146.38	801.88	190.85
Zonosaurus_brygooi	22.24	9.29	6.37	21.6	29.41	14.98	14.43	24.67	20.65	24.68	19.3	2207.81	363.45	60.62	59.6	1013.97	233.27	1012.41	309.19
Zonosaurus_haraldmeieri	25.34	8.74	7.04	12.09	30.98	18.66	12.32	26.34	23.82	26.44	23.56	1424.2	370.2	13.4	106.8	935.6	52.8	811	59
Zonosaurus_karsteni	25.22	12.36	6.5	21.36	33.46	14.52	18.94	27.28	22.48	27.43	22.1	994.52	269.3	8.3	104.08	649	31.8	427.43	40.15
Zonosaurus_laticaudatus	25.1	12.67	6.61	20.1	33.39	14.32	19.08	26.89	22.28	27.08	22.1	1103.01	307.58	3.9	112.28	751.72	16.54	507.46	18.08
Zonosaurus_madagascariensis	22.88	12.26	6.55	21.82	31.34	12.75	18.59	24.97	20.1	25.1	19.69	1380.29	316.23	17.2	96.4	819.85	65.17	676.65	81.03
Zonosaurus_ornatus	19.15	11.25	6.29	25.38	27.39	9.65	17.74	21.8	16.12	21.82	15.51	1474.69	297.53	28.97	83.72	810.78	100.65	800.23	114.38
Zonosaurus_quadrilineatus	24.03	13.09	6.34	26.4	33.31	12.89	20.42	27.11	20.66	27.11	20.4	418.11	100.89	3.89	94.78	268.44	17	268.44	17.89
Zonosaurus_rufipes	24.66	9.34	6.88	14.89	30.91	17.43	13.49	26.1	23.14	26.16	22.51	1620.96	323.44	35.2	77.51	864.3	132.46	747.23	156.61
Zonosaurus_subunicolor	23.12	10.72	6.98	15.41	29.96	14.76	15.2	24.52	21.04	24.58	20.9	1830.6	414.2	23.4	91.4	1080.4	86.4	850.2	91.2
Zonosaurus_trilineatus	23.66	13.02	6.31	28.14	32.86	12.42	20.44	26.83	20.29	26.83	19.74	500.36	103.62	8.94	80.45	286.45	32.53	282.3	45.72
Zonosaurus_tsingy	25.76	8.99	6.94	12.12	31.68	18.83	12.85	26.73	24.19	26.85	23.96	1467.31	376.69	13.94	106.38	956.81	52.56	729.69	58.31
Zootoca_vivipara	0.06	9.98	2.31	119.45	22.28	-21.61	43.89	14	-12.13	15.03	-15.7	578.95	87.97	22.75	47.42	235.26	76.69	227.02	93.2
